# 1 Low bias DNA for sustainable and efficient data storage

2 Yanmin Gao<sup>1,2</sup>, Xin Chen<sup>3</sup>, Jianye Hao<sup>4</sup>, Chengwei Zhang<sup>5</sup>, Hongyan Qiao<sup>1,2</sup> and Hao Qi<sup>1,2\*</sup>

3 <sup>1</sup> School of Chemical Engineering and Technology, Tianjin University, Tianjin, China.

4 <sup>2</sup> Key Laboratory of Systems Bioengineering (Ministry of Education), Tianjin University,  
5 Tianjin, China.

6 <sup>3</sup> Center for Applied Mathematics, Tianjin University, Tianjin, China.

7 <sup>4</sup> College of intelligence and computing, Tianjin University, Tianjin, China.

8 <sup>5</sup> College of Information Science and Technology, Dalian Maritime University, Dalian, China.

9 \* Correspondence should be addressed to H.Q. (haoq@tju.edu.cn)

10

## 11 **Abstract:**

12 In DNA data storage, the huge sequence complexity is challenging for repeatable and efficient  
13 information reading from massive DNA oligo pool. Here, we demonstrated that synthetic oligo  
14 pool comprising over ten thousand strands was largely skewed by PCR process due to its inherent  
15 mechanism of inefficient priming, product-as-template, error-spreading prone, which caused  
16 serious oligos dropout, over 50% oligos lost in repeated PCR amplification, much more fatal than  
17 base mutant for correct information retrieve. Therefore, we developed a new biochemical  
18 framework isothermal DNA reading (iDR) from large-scale oligo pool normalization (OPN) and  
19 isothermal amplification. Due to its priming-free and error-spreading proof, it achieved low-biased  
20 and stable amplification even for successive 10 times deep-reading without performance lost, the

21 first repeatable DNA storage. Furthermore, the skewed oligo pool with uneven molecule copy  
22 number of each oligos was rectified by a total 1280 chemically synthesized OPN-probes, the  
23 largest scale oligo normalization so far, and the necessary amount of sequencing reads for perfect  
24 oligos retrieve was further largely decreased. These advanced features enable the iDR chemical  
25 framework being ideal for manipulating the huge sequence complexity and building the  
26 sustainable and efficient DNA storage “hardware”.

27

## 28 **Introduction:**

29 In DNA data storage, technology originally developed for bioengineering approach including array  
30 oligo synthesis, PCR and DNA sequencing were integrated to construct the “hardware” for DNA  
31 storage<sup>1-5</sup>. Array synthesized DNA oligo pool comprising of from thousands up to millions of oligo  
32 strands with several hundred bases in length has been utilized in many advanced bioengineering  
33 applications, e.g., probe blend, DNA origami assembly, and genome synthesis<sup>1</sup>. Due to both the  
34 location on microchip and DNA sequence difference<sup>5</sup>, the copy number for each oligo strand from  
35 array synthesis is distinct. Furthermore, the sheer number of synthesized oligos from array on  
36 microchip is very small, roughly from  $10^5$  to  $10^{12}$  at the concentration of femtomolar depending  
37 on the synthesis platform<sup>6, 7</sup>. Generally, amount of a few hundred nanograms DNA at the  
38 concentration of micromolar is necessary for high quality DNA sequencing covering all oligos in  
39 the pool on commercial high throughput DNA sequencing platform, e.g., Illumina<sup>8</sup>. Therefore,  
40 amplification is crucial to boost the signal for the subsequent DNA sequencing for reading data.

41 The oligo pool size for DNA data storage is much larger at least several orders of magnitude than  
42 that in other bioengineering applications<sup>9-11</sup>. Furthermore, the unevenness of copy number  
43 generated a huge complexity that caused serious problem for DNA molecule retrieval and data  
44 decoding<sup>4, 5, 12, 13</sup>. In current reported systems, the information reading was achieved by PCR  
45 amplification and NGS, but the copy number unevenness originally stemmed from microchip  
46 synthesis was further skewed by highly biased amplification process<sup>5, 12</sup>. Therefore, more  
47 amplified DNA materials was necessary to fetch the minor oligo strands from the skewed oligo  
48 pool. The length and sequence context, GC content and secondary structure of DNA molecule are  
49 well known to introduce large amplification bias in PCR for amplification of multiple templates  
50 in parallel<sup>14</sup>. Minor oligos could be excluded easily in a few amplification cycles because of its

51 replication disadvantage. However, DNA storage requires amplification of from tens of thousands  
52 up to million distinct DNA strands at the same time. Thus far, this problem was dealt with by high  
53 encoding, physical and sequencing redundancy<sup>13, 15</sup>, but paid price of losing storage density and  
54 increasing cost in all the respects of synthesis, sequencing and decoding calculation. In previous  
55 studies, it has been demonstrated that deep PCR amplification (over 60 thermal amplification  
56 cycles) increased the unevenness of copy number largely and required several orders of magnitude  
57 more sequencing reads for decoding<sup>12</sup>. For extreme case, only a few oligos (less than 10 % of the  
58 total oligos) wiped out almost all others after PCR amplification<sup>16</sup>. Moreover, successive repeated  
59 PCR amplification significantly skewed the copy number distribution, caused large positive shift<sup>12</sup>.  
60 Even the sequences were carefully designed to minimize the sequence context difference, PCR  
61 still caused significant chaos from the huge sequence complexity of oligo pool for DNA storage  
62 and then imperiled the information decoding.

63 For practical data storage, crucial issues have to be addressed. First, information reading method  
64 should be redesigned to handle amplification of oligo pool with high complexity of DNA sequence  
65 at low bias and also support the repeated reading for long-term storage. Second, it is required to  
66 flatten the unevenness of oligo copy number following microchip synthesis for decoding with less  
67 sequencing resource. Last, the thermal cycling process in PCR not only consumes energy but also  
68 will trouble the operation of storage device. It has been reported that long thermal treatment at  
69 around 65°C resulted to oligo decay and higher temperature caused more damage to longer DNA  
70 molecule<sup>16, 17</sup>. All these issues come down to developing biosystem which could stably and  
71 repeatedly handle oligo pool with high sequence complexity and uneven copy number.

72 Here, we adapted a BASIC code system<sup>18, 19</sup> recently developed for digital distributed file system  
73 for DNA storage, in which a high information density was achieved with a low encoding

74 redundancy of 1.56%, the lowest one ever reported so far. Above all, especially for amplification  
75 of oligo pool with high sequence complexity, advanced isothermal DNA reading, termed as iDR,  
76 was designed from a novel strand displacement isothermal reaction that drives amplification with  
77 distinct mechanism to PCR. Deep statistics analysis demonstrated that oligo pool was more prone  
78 to dropout than base error during biased amplification. Oligo pool comprising over ten thousand  
79 strands was skewed even in a very light 10 cycles PCR amplification resulting to almost 4 times  
80 of oligo dropout than iDR. Moreover, dropout enlarged with the amplification depth and repeated  
81 times increased, 13.90% and 53.19% of oligo were wiped out in a 60-cycle deep and 10-times  
82 repeated PCR amplification respectively. In contrast, the letter error, either base substitution or  
83 indel mutation, remained relatively stable, but the depth of same error increased, namely error-  
84 spreading prone. These observations demonstrated that the biased amplification skewed the  
85 evenness of oligo pool largely, but base error majorly depended on the total amount of molecular  
86 replication. However, due to its molecular nature, iDR addressed these crucial issues, inefficient-  
87 priming, product-as-template that caused the bias and error-spreading in PCR amplification. For  
88 iDR, oligo dropout remained very stable at low level of around 1.33%, even after successive 10  
89 times repeated amplification. Over 70% of uniformity of oligo pool has been lost, decreased to  
90 0.15 from 0.50 in multiple PCR, but iDR remained almost same at 0.58. To the best of our  
91 knowledge, this is the first DNA storage system successfully achieved the deep repeated  
92 information reading.

93 Furthermore, we developed large-scale oligos pool normalization (OPN) to stoichiometrically  
94 rectify the oligo copy number unevenness for further improvement of information decoding. Total  
95 1280 OPN probes were designed from 5 distinct anchors and one set of 256 barcode. The large  
96 OPN probe mixture was demonstrated being able to improve the Gini index of oligo pool

97 comprising over thousands oligo stands, the most large-scale oligo normalization reported so far.  
98 Oligos was 100% retrieved from sequencing reads much less than original oligo pool read by PCR.  
99 The new biochemical framework was demonstrated being able to handle high sequence complexity,  
100 by which stable multiple reading was achieved based on error-spreading proof and low bias  
101 isothermal amplification, large scale oligo normalization and information could be decoded from  
102 at least two orders of magnitude less necessary DNA material and sequencing resource and also  
103 highly compatible with any other encoding software system for sustainable and efficient DNA data  
104 storage.

105

106 **Results:**

107 **BASIC code for DNA mediated distributed storage.**

108 In current DNA storage, the digital file was divided and written into a large group of small piece  
109 DNA oligos. Every single oligo function as individual information carrying unit. And then, the  
110 entire file can be read out from sequencing all the oligos (Fig. 1a and Supplementary Note 1).  
111 Therefore, DNA storage can be considered as a biomolecular distributed storage system, the  
112 “Software-Defined Storage” in semiconductor hard drive. Due to this nature, we adapted a BASIC  
113 coding system that is one well optimized regenerating code with reducing computational  
114 complexity for distributed storage. It is flexible for various DNA oligo length from different  
115 commercial synthesis platform. Generally, the encoding process started by dividing the target file  
116 into non-overlapping groups. And then, the split information was encoded into DNA sequence  
117 following an optimized encoding process (Supplementary Figs. 1-3) with two adjustable parameter  
118 K (corresponding to oligo number in one non-overlapping group) and L (corresponding to the  
119 length of oligo). Besides the normal file types, for the first time we tested the storage of genome  
120 sequence including human mitochondrion and one artificial bacteria cell with a different encoding  
121 strategy (Supplementary Fig. 4 and Supplementary Note 2). In genome sequence, there are many  
122 complicate structures hard for correct sequencing. Through the encoding process, the genome  
123 sequence was rewritten into nucleotide sequence again but with complicated sequence avoided and  
124 accurate sequencing guaranteed by error correcting code. Furthermore, oligo pools with different  
125 payload length have been designed to store 2.85 MB files in totally 109,568 oligo strands (Fig. 1a  
126 and Supplementary Figs. 6 and 8). Reed-Solomon code was used for error correction and coding  
127 redundancy for tolerance of missing entire oligo. In comparing with previous reported systems,  
128 relative high information density 1.65 bits/nt was achieved with a 1.56% of coding redundancy,

129 which allowing success decoding as long as oligo dropout less than 1.56%, randomly losing 4  
130 strands from 256 (Supplementary Fig. 5 and Supplementary Note 6). Technically, higher encoding  
131 redundancy tolerates losing more oligos and success decoding can be achieved from lower  
132 sequencing coverage. However, higher redundancy requires more DNA synthesis. Considering the  
133 synthesis cost is higher than sequencing, represented over 90% of the total cost of DNA storage,  
134 it is more practical to trade-off encoding redundancy for synthesis cost.

135 Chip-based synthesis only produces very small amount of oligo, roughly from  $10^5$  to  $10^{12}$  at the  
136 concentration of femtomolar depending on the synthesis platform<sup>7</sup>. In the current workflow of  
137 DNA data storage, the quality of oligo pool majorly impacted the storage performance<sup>4</sup>.  
138 Particularly, both the heterogenous oligo sequences and the unevenness of oligo copy number  
139 generated a huge sequence complexity and then caused the PCR amplification bias. Minor oligo  
140 molecules are prone to drop-out and more sequencing coverage was required for decoding oligo  
141 pool with largely skewed copy number distribution (Fig. 1b). The material of skewed oligo pool  
142 made stable and repeatable information decoding a huge challenge.

### 143 **Low-bias and error-spreading proof isothermal amplification**

144 It well known that PCR generated biased amplification from its inherent mechanism, i.e., product-  
145 as-template, priming and thermal cycling dependent amplification<sup>20</sup>. In order to address these  
146 problems that easily skewed the oligo copy number distribution, we designed a method from novel  
147 isothermal DNA replication. In comparing with PCR depending on thermal cycling to drive DNA  
148 replication, sequence specific nickase and DNA polymerase with processive strand displacement  
149 activity were recruited for DNA amplification under consistent low temperature<sup>21</sup>. After  
150 systematical optimization (Supplementary Figs. 12-24 and Supplementary Note 4), Nt.BbvCI and  
151 exonuclease deficient DNAP I Klenow fragment ( $3' \rightarrow 5'$  exo<sup>-</sup>) were used to amplify oligos



152 immobilized on magnetic microbeads. The immobilized isothermal DNA replication system was  
153 designated as iDR, isothermal DNA reading (Fig. 2a).

154 The intrinsic features of iDR specifically facilitate DNA storage application. In theory, for one 50  
155  $\mu$ l reaction, 10 PCR thermal cycles required about 177.8J energy only for thermal regulation at  
156 least two orders of magnitude more than 30 mins iDR of 2.52J (Fig. 2b and Supplementary Note  
157 7) and it may be a huge issue at large scale of operation. Real time monitoring indicated that  
158 amplification rate of iDR is very close to PCR, even generally it was considered as a linear  
159 replication (Supplementary Figs. 25 and 26). Single-stranded or double-stranded DNA can be  
160 produced in a controlled manner (Fig. 2c). Specially, ssDNA was amplified in a primer-free  
161 manner and allows iDR to be a universal method for reading information with no sequence  
162 information needed in advance. The nickase mediated site-specific phosphodiester bond cleavage  
163 initiated the iDR amplification and generated a 5' terminal phosphate group, its function was  
164 verified by direct ligation to a FAM labeled probe (Fig. 2d and Supplementary Figs. 27 and 28).  
165 This inborn phosphate group is very convenient for subsequent functional adapter linking.

166 Amplified oligos were sequenced on commercial Illumina Hiseq 4000 platform with 150 paired-  
167 end cycles and then deeply analyzed by a set of statistics methods developed from bioinformatic  
168 BLAST program (Supplementary Fig. 30). Sequenced reads with various number of letter error  
169 including substitution and indel were counted with significant different amount. Among them,  
170 single letter error accounted for the vast majority in mutant sequenced reads for both PCR (80.1%)  
171 and iDR (81.7%) (Fig. 2e, Supplementary Figs. 31-35 and Supplementary Note 11). The total indel  
172 (0.03%) and substitution (0.2%) base rate were consistent with previous studies<sup>13</sup>. Although, RS  
173 code is able to correct multiple errors in same DNA strand but will increase the computation  
174 complexity largely<sup>17,22</sup>. Therefore, both sequenced reads with no or single substitution/indel error

175 were collected as valid reads for further analysis. The distribution of the number of reads per each  
176 given sequence were different between iDR and light PCR of just 10 thermal cycles. The  
177 distribution normality was quantified by a modified function (Supplementary Note 9). In theory,  
178 oligo pool of higher value distribution normality require less sequencing reads to recover all  
179 synthesized oligos<sup>12</sup>. The coverage distribution of both 10 cycles PCR and iDR were positively  
180 skewed with a long tail, which comprising of high copy number oligos, but the normality of 10  
181 cycles PCR decreased about 16% than iDR (Fig. 2f). The proportion of oligos with high copy  
182 number in the tail, the top 30% of high coverage, enlarged with the PCR cycles increased  
183 (Supplementary Fig. 38 and Supplementary Note 9). No obvious difference was observed between  
184 the coverage distribution of iDR amplification from free oligo pool and oligo pool immobilized on  
185 magnetic beads (Supplementary Figs. 39 and 40). These results demonstrated that even just 10  
186 thermal cycles largely skewed the oligo pool due to the PCR amplification bias and the  
187 amplification of iDR was much low-biased.

188 Deep errors, reads with mutant in high copy number, impeded information decoding. Sequenced  
189 reads were further sorted out as group of M0G0 (with no letter error) and M1G1 (with single letter  
190 substitution or indel error) by developed BLAST programs. The distribution of the number of reads  
191 in M0G0 and M1G1 overlapped for both PCR and iDR (Fig. 2g). The extent of overlap between  
192 coverage distribution of M0G0 and M1G1 correlated with the potential of mutant reads affecting  
193 retrieval of correct reads for decoding. The max coverage for M1G1 of 10 cycles PCR was counted  
194 as 63 and 6956 oligos in PCR M0G0 was identified with copy number lower than it, accounting  
195 for 60.38% of total oligos. However, the corresponding number for iDR were counted respectively  
196 as 28 and 2011, accounting for 17.46% of total oligos, 71% less deep error than PCR. It indicted  
197 that in PCR 60.38% of oligos will be infected if retrieved by principle of law of large number-

198 makers, but only 17.46% for iDR. Because same master pool used as template, it demonstrated  
199 that error accumulated much more in PCR than iDR. And even only 10 thermal cycles of PCR  
200 caused deep error-spreading that would cause huge calculation in identifying the majority (over  
201 60%) of correct oligos and the proportion enlarged with PCR cycle number increased  
202 (Supplementary Fig. 45). Moreover, both the total rate for substitution or indel error and proportion  
203 of valid reads (combined M0G0 and M1G1 group) in all noisy sequenced reads remained stable  
204 for both iDR and PCR of thermal cycles from 10 to 60 (Fig. 2h and Supplementary Figs. 47 and  
205 48). In comparison, the dropout rate increased significantly from 4.18% to 13.80% with PCR  
206 amplification becoming deeper, much higher than iDR of 1.33%. Low replication fidelity of DNA  
207 polymerases and around 1% miss reading coming along with NGS sequencing process<sup>23</sup> largely  
208 contributed to the massive error reads with low copy number, e.g. 1-2 copy number, but it is  
209 relatively easy to identify them from correct reads in high copy number. Considering the  
210 mechanism, product-as-template and inefficient priming process caused the high amplification  
211 bias and made PCR amplification prone to error-spreading and oligo dropout. In contrast, iDR was  
212 designed to synthesize new oligo only from the original templates without priming process for  
213 replication initiation and therefore iDR achieved a low biased and error-spreading proof  
214 amplification and will require much less calculation resource in decoding process. Additionally,  
215 high temperature treatment resulted to DNA oligo decay especially for long strands<sup>17,24</sup>. The decay  
216 lost rate in a 10 cycles PCR was calculated as 21.8% and 0.035% for iDR (Fig. 2b and  
217 Supplementary Note 8) from a plotted DNA half-life graph (Supplementary Fig. 29).

### 218 **Multiple-repeated information reading.**

219 The amplification capability for successive deep reading oligo pool containing from 11,520 to  
220 89,088 DNA strands was examined. PCR amplification was successively performed 10 times from

221 aliquot of previous reaction and iDR amplification was repeated 10 times from immobilized oligos  
222 pool (Fig. 3a, Supplementary Figs. 49-51). In #1, #5 and #10 of successive PCR, the proportion of  
223 amplified oligos with up to total 10 substitution or indel letter error decreased from 89.09% ( $\pm 10$   
224 of PCR #1) to 49.97% ( $\pm 10$  of PCR #10) and from 86.77% ( $\pm 1$  of PCR #1) to 48.58% ( $\pm 1$  of PCR  
225 #10). In comparison, the repeated iDR remained very consistent over 90% (Fig. 3b). These  
226 statistics results indicated that large noise was introduced during PCR procedure and amplified  
227 oligo with imperfect length increased from inefficient replication or miss priming. However, no  
228 obvious difference was observed in proportion of M1G1 in total sequenced reads between PCR  
229 and iDR, but the mean copy number in M1G1 reads increased from 1.10 of #1 PCR to 1.95 of #10  
230 PCR, but only slightly changed for iDR, 1.08 of #1, 1.08 of #5 and 1.05 of #10 (Fig. 3c). This  
231 result was in agreement with previous experiment in figure 2g and indicated that error accumulated  
232 to high copy number during PCR and iDR achieved error-spreading proof amplification.

233 Interestingly, it was observed that the distribution of the number of reads per each given sequence  
234 changed differently. Normality of #1, #5 and #10 PCR decreased significantly from 0.50 to 0.15.  
235 In contrast, #1, #5 and #10 iDR gave a consistent normality of 0.58 (Fig. 3d, Supplementary Figs.  
236 52-55). For successive PCR, the coverage distribution was largely positively skewed and the  
237 proportion of both low copy number and high copy number oligos significantly increased. It  
238 indicated that large enrichment driven by amplification bias for part of oligos efficiently occurred  
239 with the successive PCR, but not in repeated iDR. Furthermore, it was observed that only top 1%  
240 oligo of high coverage increased its proportion significantly and both 1% oligos of middle and low  
241 coverage decreased while the oligo pool was successively read by PCR. In contrast, all the 1%  
242 oligos remained steady in repeated iDR (Supplementary Fig. 56 and Supplementary Note 9). The  
243 dropout rate in random valid reads set with 10x coverage was quantified to further assess the

244 amplification bias. For PCR, the dropout rate increased sharply from 4.18% (#1 PCR) to 53.19%  
245 (#10 PCR) (Fig.3e), but iDR remained steady at about 2%. Due to the tolerance for 1.56% dropout  
246 in BASIC encoding algorithms, we also calculated the coverage depth for random valid reads set  
247 with 1.56% dropout (Supplementary Note 6), the crucial parameter for the theoretical minimum  
248 decoding coverage. For PCR, the minimum coverage depth was quantified as 17.2 (#1 PCR) and  
249 167 (#5 PCR). Because #10 PCR lost too many oligos, the minimum coverage depth was  
250 calculated as 426 from calculation (Supplementary Fig. 61). For iDR, the minimum coverage  
251 depth was quantified as 11 for #1, 12 for #5 and 12.5 for #10. Thus far, for PCR based sustainable  
252 DNA media reading, one strategy is deep amplification from trace DNA material with large  
253 number of thermal cycles and another is successive amplification from aliquot of previous reaction.  
254 However, we demonstrated that both strategies are not practical. The nature of PCR including  
255 especially inefficient priming and product-as-template generated large amplification bias that  
256 significantly skewed the copy number distribution and resulted huge dropout in both 60 cycles  
257 deep amplification and 10 times successive amplification, especially for oligo pool with huge  
258 sequence complexity. Based on these deep statistical analyses, we pointed out that iDR  
259 amplification was more stable, robust and suitable for repetitive read than PCR in DNA data  
260 storage.

### 261 **Large-scale oligo pool normalization improved information reading.**

262 Besides the amplification procedure, the unevenness of oligo copy number originally stem from  
263 microchip-based synthesis. However, there is still short of handy technology to normalize oligo  
264 pool with high sequence complexity. To address this problem, we developed a simple oligo pool  
265 method based on a previous reported study<sup>25</sup> but with more simple and flexible procedure and  
266 without expensive DNA chemical modification. Two-parts probe was designed, in which constant

267 anchor part provide basic efficient binding and short variable 9nts barcode part generating 256  
268 specific targets recognition with no expensive modification. In particular, oligo pool normalizing  
269 (OPN) sequence was synthesized at the 3' terminal end, which comprising of barcode (9 nts) and  
270 universal fragment (17 nts) (Fig. 4b and Supplementary Fig. 8). The barcode guided the OPN probe  
271 to identify its target while universal fragment binding as an anchor (Fig. 4b). The unique barcode  
272 sequence "GWSWSWS", alternating strong (G or C) and weak (A or T) bases (e.g. CACTGT or  
273 GTCTGA), has been proven being able to generate 256 high specific binding (Supplementary Note  
274 5). After perfect binding, OPN probe was extended by DNA polymerase, turning oligo into double-  
275 stranded form and then the remaining ssDNA oligos were removed by exonuclease I degradation  
276 (Fig. 4a). Due to the precisely selected degradation of normalization and the low productivity of  
277 microchip oligo synthesis, it is necessary to amplify the oligo pool to a large quantity but keeping  
278 its single-stranded form. Therefore, we developed a simple single-stranded oligo pool  
279 amplification protocol (SOA), by which ssDNA oligo pool was amplified by PCR with normal  
280 forward primer and 5'-phosphated reverse primer and then only strand extended from forward  
281 primer was removed by lambda exonuclease and the intact complementary strand was left  
282 (Supplementary Figs. 62 and 63).

283 First, we tested the normalization of three oligos of different length with 3' terminal FAM label,  
284 which was mixed at input molar ratio of 1:5:25. After OPN normalization, the output oligos were  
285 quantified as molar ratio of 0.95:1:1.25 (Fig. 4d and Supplementary Fig. 64). Next, we proceeded  
286 to test normalization improved information decoding. As proof-of-concept, OPN 1.0 with 256  
287 probes, which were synthesized separately and mixed at equal molar ratio, were used to normalize  
288 256 oligos synthesized from microchip with other 10752 oligos together (Fig. 4c). Following the  
289 SOA protocol, 256 single-stranded oligos pool was prepared and normalized, each OPN probe was

290 equal to the average molar concentration of the oligo pool. The coverage depth of each oligo in  
291 OPN 1.0-iDR was significantly improved in comparing with iDR amplified oligo pool without  
292 OPN normalization (Fig. 4e). The PCR-amplified oligo pool showed skewed normality than OPN-  
293 iDR (Supplementary Figs. 65 and 67) and high copy number oligo in PCR was obviously  
294 normalized in OPN-iDR (Supplementary Fig. 66) with decreased standard deviation in  
295 quantification of molecule number of each oligo strands. And then, dropout rate for random valid  
296 reads set with various coverage depth was plotted (Supplementary Fig. 68). All of the dropout rate  
297 decreased as coverage increased. At the coverage of about 25, the dropout rate of PCR became  
298 lower than 1.56%, the limit for decoding. However, all of dropout rate of OPN-iDR was lower  
299 than 1.56% and became 0 at around coverage of 20. The dropout rate of iDR was always higher  
300 than OPN-iDR but much lower than PCR. At coverage of 10, the dropout rate of OPN-iDR was  
301 almost one order of magnitude lower than PCR. The recognition capability of OPN1.0 was  
302 extended simply by recruiting more anchor design. In OPN2.0 (Fig. 4f), 1024 specific target oligo  
303 recognition was generated from 4 distinct anchor sequences and the one set 256 barcode. All of  
304 these 1024 oligos was perfect retrieved from 87x sequencing reads less than that 223x of PCR  
305 amplified oligos (Fig. 4g and Supplementary Figs.69 and 71). Technically, this method can be  
306 expanded by using a combination of a group of specific universal probes<sup>13</sup> and the 256 barcodes  
307 to manipulate oligo pool comprising of up to 3 Million oligos (Supplementary note 5). Although  
308 minimum decoding coverage depth previously reported (Supplementary Fig. 72) is lower than the  
309 result presented here, we have to point out that the minimum decoding coverage is highly  
310 dependent on both the encoding system with different encoding redundancy and the quality of  
311 oligo pool from different synthesis platform (Supplementary Figs. 73-76) and it is hard to compare  
312 the results cross different systems.

313 **Discussion:**

314 DNA data storage is one very artificial application and actually the concept has been proposed for  
315 a long time<sup>26</sup>. But till lately, the significantly increasing capability of DNA synthesis and  
316 sequencing start making it possible. In many respects, practical DNA data storage requires more  
317 powerful capability for all related biotechnologies, including synthesis, sequencing and  
318 manipulation of oligo pool with high sequence complexity. The size of oligo pool used in DNA  
319 storage is already several orders of magnitude larger than that in other applications. However, there  
320 is still short of hardware technology which is designed for DNA storage, especially manipulation  
321 of DNA oligo pool with huge sequence complexity and unevenness of molecule copy number. In  
322 studies to date, PCR is still the only method for amplification of oligo pool for reading information.  
323 However, with deep bioinformatic and statistics analysis, we demonstrated that PCR amplification  
324 skewed the oligo pool even after a very few thermal cycles (10 cycles) and the skewness largely  
325 increased, deep error spreading and massive dropout, as the function of amplification cycle  
326 numbers. Deep error, mutant sequenced reads in high coverage, interfered decoding and caused  
327 significant increased calculation, but decoding fatally crashed due to massive dropout. We contend  
328 that the features of low temperature, priming-free, and enzyme-mediated double helix unzipping  
329 in iDR amplification presented here, overcame the major amplification bias related issues of PCR  
330 including the inefficient priming, product-as-template, sequence context dependent, and high  
331 temperature heating. iDR achieved very stable amplification performance, which efficiently  
332 prevented the mutant error from spreading, decreased over 70% deep error, and achieved  
333 successive repeated deep reading with consistent outcome quality. Actually, the physical storage  
334 density, the most significant advantage of DNA storage with a calculation of a few kilograms DNA  
335 material for storage of data from the whole human society<sup>27</sup>, highly depend on the quality of DNA



336 reading. Therefore, higher physical storage density could be achieved by iDR system, which could  
337 store information with at least two orders of magnitude less DNA material and sequencing resource  
338 than the current PCR method (Fig. 5 and Supplementary Note 12).

339 Although, there is many variants of PCR, such as emulsion PCR, digital PCR, and multiplex PCR,  
340 but none of them can avoid the crucial issues of product-as-template, inefficient priming, and  
341 complex thermal regulation. Furthermore, Replication fidelity of DNAP I Klenow fragment used  
342 in iDR system is much lower than Q5 DNA polymerase in PCR. There is still much room for  
343 improvement. Additionally, practical DNA storage system must move out of biochemical test tube  
344 to build device by highly integrating all related biochemical processes. Prototypes of DNA storage  
345 hardware have already been proposed with high density DNA material in microfluidic device<sup>28,29</sup>.  
346 We contend that besides some crucial features of iDR make it more fit for hardware construction.  
347 In iDR, only low temperature, slightly higher than room temperature, was required. Considering  
348 the operation of DNA storage up to large scale, there will be a huge difference in energy  
349 consumption. Furthermore, iDR is able to work in a primer-free fashion, only defined protein  
350 enzyme mix is required no matter what information was encoded, which makes it possible for  
351 universal information reading without any sequence information required in advance. To the best  
352 of our knowledge, iDR is the first system for stable repeated DNA information reading which is  
353 crucial and necessary feature for practical and sustainable storage hardware.

354 The large-scale oligo normalization is another advanced feature for DNA storage. Comparing with  
355 the previous reported system, OPN was developed as a simple and very economical process  
356 without any expensive modification directly on oligo pool or OPN probe, such as dexoyuracl (dU)  
357 and biotin, none of them has been reported to be synthesized directly on chip-array. Then OPN  
358 could be applied to any chip-array oligo synthesis platform and the OPN probe synthesis cost is

359 also acceptable (Supplementary Fig.77). Additionally, SOA protocol was developed enabling  
360 OPN to manipulate oligo pool with very small amount DNA molecule, generally chip-array  
361 synthesized oligo pool is very small amount. Moreover, the capability of OPN could be easily  
362 extended. OPN 2.0 achieved specifically targeting 1024 oligos, 4 times of OPN 1.0, simply by  
363 combining 4 distinct anchor sequences, which is the most large-scale oligo pool normalization  
364 reported so far. 1024 array synthesized oligos was revised with improved Gini index  
365 (Supplementary Fig.70), and was perfect identified from sequencing reads (87x) less than that  
366 (223x) for PCR amplified oligos. Therefore, the necessary DNA material and sequencing resource  
367 for information decoding could be decreased at least two orders of magnitude (Fig. 5), which is a  
368 huge advantage in considering application of DNA storage in large scale comparing to current big  
369 data center. Following the parallel extension strategy, target recognition could be leveraged to  
370 million in an economical way (Supplementary note 5 and Supplementary Fig.63). Therefore, we  
371 believed that this new biochemical framework with stable repeated reading and large-scale  
372 normalization lays a foundation for development of practical and sustainable DNA storage.

373

374 **ACKNOWLEDGMENTS**

375 We would like to thank Professor Hanxu Hou from Dongguan University of Technology for advice  
376 and assistance with designing algorithm for BASIC code. We also thank Yixi Wang from College  
377 of intelligence and computing at Tianjin University for her help in test of encoding system. This  
378 work was supported by the National Science Foundation of China (Grant No.21476167,  
379 No.21778039 and No.21621004).

380

381 **AUTHOR CONTRIBUTIONS**

382 Y.G. and H.Q. designed and performed all experiments. X.C., J.H. and C.Z. designed and  
383 developed the encoding and decoding program. X.C. developed program for the bioinformatics  
384 statistics analysis. Y.G., H.Qiao and H.Q. collected and analyzed all experiment data. G.Y. T.H.  
385 and H.Q. wrote the manuscript. H.Q. designed experiments, analyzed data and supervised this  
386 work.

387

388 **COMPETING FINANCIAL INTERESTS**

389 H.Q. is the inventor of two patents application for the biochemical method described in this article.  
390 The initial filings were assigned Chinese patent application (201911086860.0 and  
391 201911087247.0) and international patent application (PCT/CN2019/123916). The remaining  
392 authors declare no competing financial interests.

393 **References:**

- 394 1. Kosuri, S. & Church, G.M. Large-scale de novo DNA synthesis: technologies and  
395 applications. *Nat Methods* **11**, 499-507 (2014).
- 396 2. Goodwin, S., McPherson, J.D. & McCombie, W.R. Coming of age: ten years of next-  
397 generation sequencing technologies. *Nat Rev Genet* **17**, 333-351 (2016).
- 398 3. Kozarewa, I. et al. Amplification-free Illumina sequencing-library preparation facilitates  
399 improved mapping and assembly of (G+C)-biased genomes. *Nat Methods* **6**, 291-295  
400 (2009).
- 401 4. Organick, L. et al. Experimental Assessment of PCR Specificity and Copy Number for  
402 Reliable Data Retrieval in DNA Storage. (2019).
- 403 5. Chen, Y.-J. et al. Quantifying Molecular Bias in DNA Data Storage. (2019).
- 404 6. Klein, J.C. et al. Multiplex pairwise assembly of array-derived DNA oligonucleotides.  
405 *Nucleic Acids Res* **44**, e43 (2016).
- 406 7. Jingdong Tian, H.G., Nijing Sheng, Xiaochuan Zhou, Erdogan Gulari, Xiaolian Gao &  
407 George Church Accurate multiplex gene synthesis from programmable DNA microchips.  
408 *Nature* **432**, 1050-1054 (2004).
- 409 8. Linnarsson, S. Recent advances in DNA sequencing methods - general principles of sample  
410 preparation. *Exp Cell Res* **316**, 1339-1343 (2010).
- 411 9. Kosuri, S. et al. Scalable gene synthesis by selective amplification of DNA pools from  
412 high-fidelity microchips. *Nat Biotechnol* **28**, 1295-1299 (2010).
- 413 10. Lipshutz, R.J., Fodor, S.P., Gingeras, T.R. & Lockhart, D.J. High density synthetic  
414 oligonucleotide arrays. *Nat Genet* **21**, 20-24 (1999).
- 415 11. Bonde, M.T. et al. Direct mutagenesis of thousands of genomic targets using microarray-  
416 derived oligonucleotides. *ACS Synth Biol* **4**, 17-22 (2015).
- 417 12. Erlich, Y. & Zielinski, D. DNA Fountain enables a robust and efficient storage architecture.  
418 *Science* **355**, 950-954 (2017).
- 419 13. Organick, L. et al. Random access in large-scale DNA data storage. *Nat Biotechnol* **36**,  
420 242-248 (2018).
- 421 14. Aird, D. et al. Analyzing and minimizing PCR amplification bias in Illumina sequencing  
422 libraries. *Genome Biol* **12**, R18 (2011).
- 423 15. Goldman, N. et al. Towards practical, high-capacity, low-maintenance information storage  
424 in synthesized DNA. *Nature* **494**, 77-80 (2013).
- 425 16. Heckel, R., Mikutis, G. & Grass, R.N. A Characterization of the DNA Data Storage  
426 Channel. *Sci Rep* **9**, 9663 (2019).
- 427 17. Grass, R.N., Heckel, R., Puddu, M., Paunescu, D. & Stark, W.J. Robust chemical  
428 preservation of digital information on DNA in silica with error-correcting codes.  
429 *Angewandte Chemie* **54**, 2552-2555 (2015).
- 430 18. Hou, H., Shum, K.W., Chen, M. & Li, H. BASIC Codes: Low-Complexity Regenerating  
431 Codes for Distributed Storage Systems. *IEEE Transactions on Information Theory* **62**,  
432 3053-3069 (2016).
- 433 19. Hou, H., Han, Y.S., Shum, K.W. & Li, H. A Unified Form of EVENODD and RDP Codes  
434 and Their Efficient Decoding. *IEEE Transactions on Communications* **66**, 5053-5066  
435 (2018).
- 436 20. Mullis, K.B. & Faloona, F.A. Specific synthesis of DNA in vitro via a polymerase-  
437 catalyzed chain reaction. *Methods Enzymol* **155**, 335-350 (1987).

- 438 21. Joneja, A. & Huang, X. Linear nicking endonuclease-mediated strand-displacement DNA  
439 amplification. *Anal Biochem* **414**, 58-69 (2011).
- 440 22. Anavy, L., Vaknin, I., Atar, O., Amit, R. & Yakhini, Z. Data storage in DNA with fewer  
441 synthesis cycles using composite DNA letters. *Nat Biotechnol* (2019).
- 442 23. Yazdi, S.M., Yuan, Y., Ma, J., Zhao, H. & Milenkovic, O. A Rewritable, Random-Access  
443 DNA-Based Storage System. *Sci Rep* **5**, 14138 (2015).
- 444 24. A Characterization of the DNA Data Storage Channel. (2018).
- 445 25. Pinto, A., Chen, S.X. & Zhang, D.Y. Simultaneous and stoichiometric purification of  
446 hundreds of oligonucleotides. *Nat Commun* **9**, 2467 (2018).
- 447 26. Wallace, M.R. Molecular Cybernetics: The Next Step? *Kybernetes* **7**, 265-268 (1978).
- 448 27. Extance, A. How DNA could store all the world's data. *Nature* **537**, 22-24 (2016).
- 449 28. Newman, S. et al. High density DNA data storage library via dehydration with digital  
450 microfluidic retrieval. *Nat Commun* **10**, 1706 (2019).
- 451 29. Takahashi, C.N., Nguyen, B.H., Strauss, K. & Ceze, L. Demonstration of End-to-End  
452 Automation of DNA Data Storage. *Sci Rep* **9**, 4998 (2019).

453

454

455

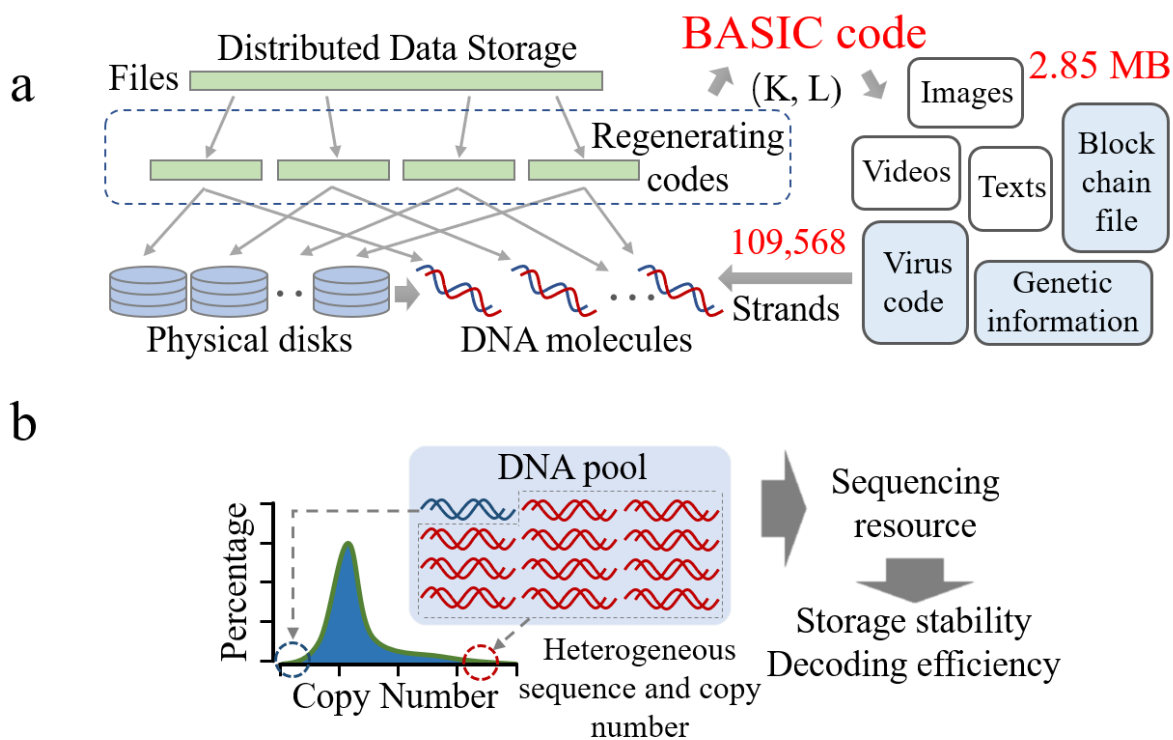

456

457

458 **Figure 1:** Overview of the DNA data storage.

459 **(a)** Schematic of the DNA mediated distributed data storage and totally 2.85 MB data, including  
460 text,s, images, videos, and block chain file, computer virus code, genetic information, were  
461 encoded into total 109,568 synthesis oligos using a adapted BASIC code system.

462 **(b)** Illustration of data storage in synthesis oligo pool. The huge sequence complexity and  
463 unevenness of oligo copy number is challenging the stable storage and precise decoding.

464

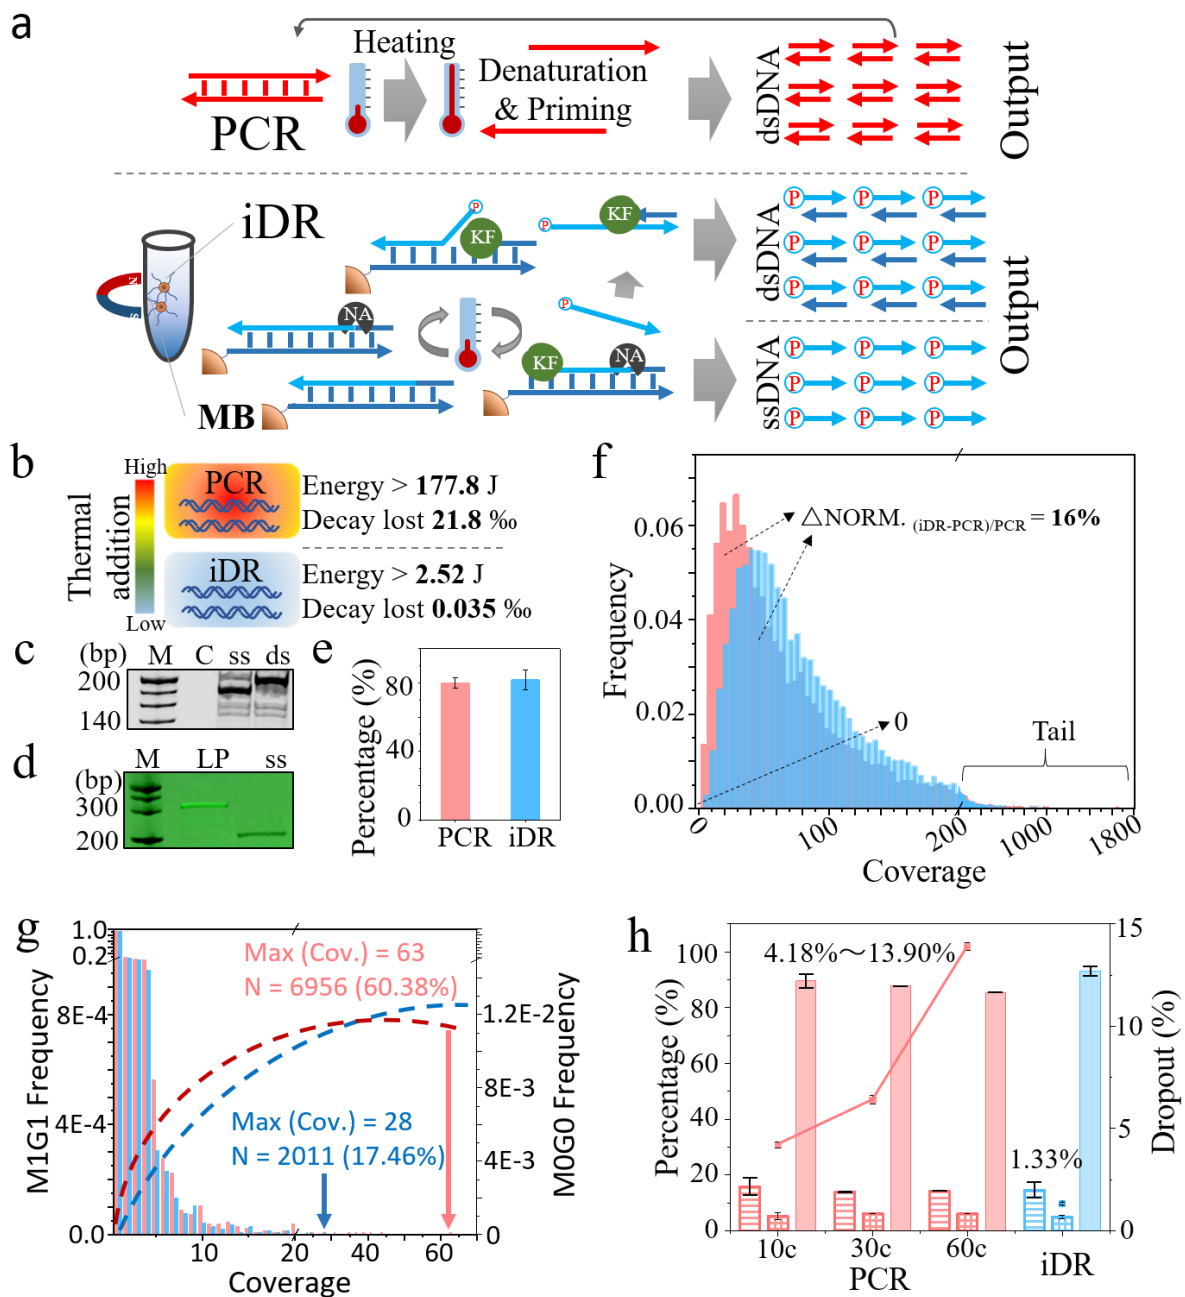

465

466

467 **Figure 2:** Designed isothermal DNA reading (iDR) for DNA data storage.

468 (a) Illustration of the DNA amplification of PCR (upper) and iDR (lower). PCR depend on thermal

469 cycling to drive replication. By contrast, isothermal DNA reading was developed from

470 systematically optimized strand displacement mediated replication, in which nickase and specific  
471 DNA polymerase collaborate to drive amplification under consistent low temperature.

472 **(b)** Calculation of energy consumption and the oligo degradation decay for one 50ul liquid reaction  
473 amplified by 10 thermal cycles PCR or iDR. PCR and iDR required 177.8 J and 2.52 J respectively  
474 only for thermal regulation theoretically. Thermal treatment caused oligo decay rate was calculated  
475 as 21.8‰ for 10 cycles PCR and 0.035‰ for iDR respectively.

476 **(c)** Single-stranded and double-stranded oligo amplified by iDR from a 218nt dsDNA template  
477 were analyzed on 10% native PAGE gel. M: 20 bp DNA Ladder; C: negative control of  
478 amplification without input template; ss: single-stranded DNA product; ds: double-stranded DNA  
479 product.

480 **(d)** A 5' terminal FAM labeled 30nt single-stranded probe ligated to 198nt single-stranded DNA  
481 with an inborn 5' terminal phosphate group directly from iDR amplification was analyzed and  
482 imaged on a 12% UREA denature PAGE. M: 20 bp DNA Ladder; LP: ligation product; ss: ssDNA  
483 product of iDR.

484 **(e)** Sequenced reads with single letter error, substitution or indel, accounted for the vast majority  
485 in total mutant sequenced reads for both PCR (80.1%) and iDR (81.7%). Error bars represent the  
486 mean  $\pm$ s.d., where  $n = 3$ .

487 **(f)** Coverage depth distribution of sequenced reads for 10 cycles PCR and iDR amplification were  
488 positively skewed but with 0 oligo dropout, but the distribution normality of PCR decreased about  
489 16% than iDR.

490 **(g)** Sequenced reads were grouped as M0G0 (with no letter error) and M1G1 (with single letter  
491 substitution or indel error) by developed BLAST programs. In M1G1 of 10 cycles PCR the max



492 coverage was counted as 63 and 6956 oligos overlapped with M0G0 group, accounting for 60.38%  
493 of total oligos. For iDR it was 28 and 2011 respectively, accounting for 17.46% of total oligos  
494 with 71% of deep error decreased.

495 **(h)** The proportion of error reads and valid reads (total reads with no or single substitution/indel  
496 error) per million noise sequenced reads were plotted, striped column for base substitution; grid  
497 column for indel, and solid bar for valid reads. For 10, 30 and 60 cycles PCR, the substitution were  
498 15.92%, 13.90% and 14.27%, and indel were 5.28%, 6.16% and 6.15%, and valid reads were  
499 89.58%, 87.73% and 85.53% respectively. For iDR, 14.69% for substitution error, 4.99 for indel  
500 and 93.15% for valid reads. Error bars represent the mean  $\pm$ s.d., where  $n = 3$ . Oligo dropout rate  
501 calculated from random reads set with a mean 10x coverage depth was plotted. For 10, 30 and 60  
502 thermal cycles PCR (red line), it was counted as 4.18%, 6.41% and 13.90% respectively, and 1.33%  
503 for iDR (blue dot). Error bars represent the mean  $\pm$ s.d., where  $n = 10$ .

504

505

506

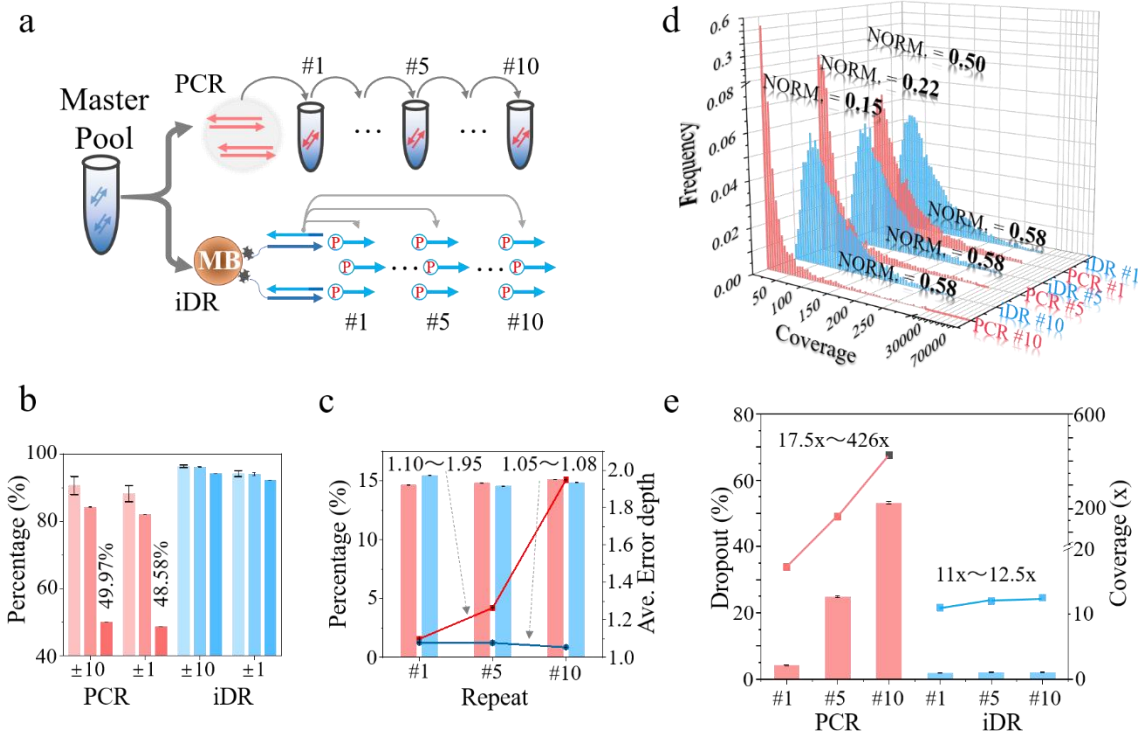

507

508

509 **Figure 3: Multiple information reading from DNA storage.**

510 **(a)** Illustration of successive DNA reading. Repeated PCR amplification was successively  
 511 performed 10 times with aliquot of previous reaction as template and the oligos pool immobilized  
 512 on magnetic beads was successive amplified 10 times by iDR. The same master oligo pool was  
 513 used as the initial template and #1, #5 and #10 amplified oligos were analyzed.

514 **(b)** The proportion of reads with up to 10 substitution or indel letter error per million sequenced  
 515 reads were counted as 90.65% (#1 PCR, light red), 84.26% (#5 PCR, red), 49.97% (#10 PCR, dark  
 516 red), 96.35% (#1 iDR, light blue), 96.14% (#5 iDR, blue), and 94.12% (#10 iDR, dark blue), and

517 error reads with up to 1 error were counted as 88.18% (#1 PCR), 82.05% (#5 PCR), 48.58% (#1  
518 PCR), 94.18% (#1 iDR), 94.04% (#5 iDR), and 92.21% (#10 iDR). Error bars represent the mean  
519  $\pm$ s.d., where  $n = 3$ .

520 (c) The proportion of M1G1 reads per million valid reads were, PCR (red column), 14.65% (#1  
521 PCR), 14.82% (#5 PCR), 15.10% (#10 PCR), and iDR (blue column) 15.46% (#1 iDR), 14.55%  
522 (#5 iDR), and 14.86% (#10 iDR). The average error reads depth of PCR (red line, 0.5 for #1, 0.22  
523 for #5, 0.15 for #10) increased and iDR (blue), but iDR (blue line, 1.08 for #1), 1.08 for #5), 1.05  
524 for #10) remained stable. Error bars represent the mean  $\pm$ s.d., where  $n = 3$ .

525 (d) The distribution of reads number per each given sequence per million sequenced reads of #1,  
526 #5, and #10 of PCR and iDR. The distribution normality was 0.5 (#1 PCR), 0.22 (#5 PCR), 0.15  
527 (#10 PCR), 0.58 (#1, #5, #10 iDR) respectively.

528 (e) The dropout rate for random sequenced reads set with 10x coverage depth was plotted, PCR  
529 (red column, 4.18% for #1, 22.89% for #5 and 53.19% for #10) and iDR (blue column, 1.86% for  
530 #1, 2.08% for #5 and 2.09% for #10). Error bars represent the mean  $\pm$ s.d., where  $n = 3$ . The  
531 coverage depth for random sequenced reads with 1.56% dropout was calculated as 17.2 (#1 PCR),  
532 167 (#5 PCR), 426 (#10 PCR) and 11 (#1 iDR), 12 (#5 iDR), and 12.5 (#10 iDR) respectively.  
533 Error bars represent the mean  $\pm$ s.d., where  $n = 10$ .

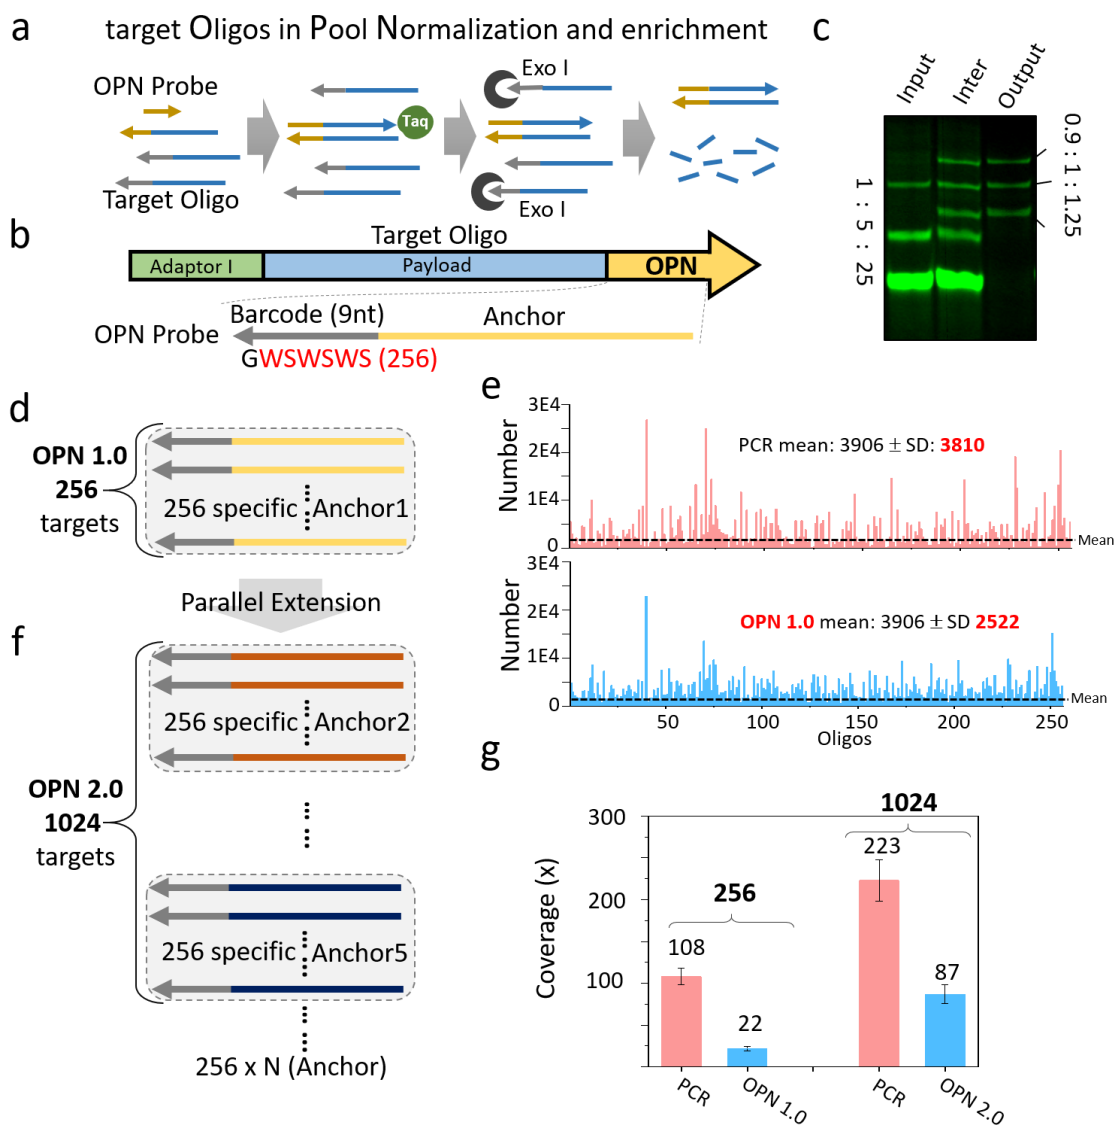

534

535

536 **Figure 4** Large scale normalized oligo pool improved information read-out.

537 **(a)** Brief workflow for OPN probe mediated oligo pool normalization. Oligos are captured by the  
 538 corresponding OPN probe and extended to dsDNA by Taq DNA polymerase. Then the remaining  
 539 ssDNA oligos and probes are digested by exonuclease I.

540 **(b)** Structure of oligo for oligo pool normalizing (OPN). The adaptor I region, R (nickase  
541 recognition sequence) region, payload, and OPN region. In OPN region, barcode sequence with 9  
542 nts in length and a unique “GWSWSWS” pattern with alternating strong (G or C) and weak (A or  
543 T) bases (e.g. CACTGT or GTCTGA), by which 256 high specific binding could be generated and  
544 universal fragment (17 nts).

545 **(c)** Normalization of 3’ terminal FAM labeled three oligos, 60 nts, 73 nts and 90 nts in length, with  
546 input molar ratio of 1:5:25 and the output oligos were quantified as molar ratio of 0.95:1:1.25 on  
547 15% native PAGE after OPN.

548 **(d)** OPN 1.0 constructed on one anchor sequence with 256 specific target oligo recognition.

549 **(e)** The copy number of each oligo of 256 oligo pool per million valid sequenced reads. 256 oligo  
550 pool amplified by PCR (red) was counted with mean copy number  $3906 \pm 3810$  and (blue)  $3906$   
551  $\pm 2522$  for oligo pool revised by OPN 1.0 and then read by iDR.

552 **(f)** OPN 2.0 constructed from 4 distinct anchor sequences and one set of 256 barcode with 1024  
553 specific target oligo recognition.

554 **(g)** The minimal necessary sequencing reads for complete oligos retrieve without dropout for 254  
555 oligos pool read by PCR and OPN 1.0-iDR respectively, and 1024 oligo pool read by PCR and  
556 OPN 2.0-iDR respectively.

557

558

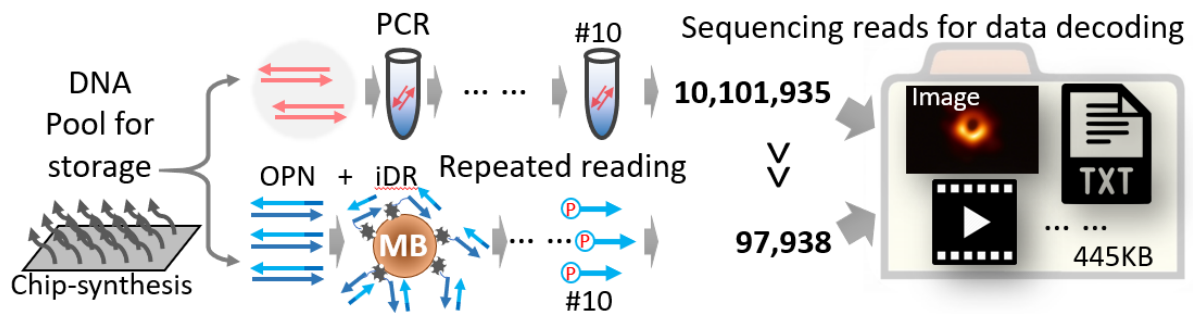

559

560 **Figure 5.** Sustainable and repeated DNA storage.

561 Chip-synthesized DNA oligo pool, in which digital information including image, video and text,  
562 were stored, was repeated read by PCR and OPN-iDR respectively. For current used PCR,  
563 10,101,935 NGS noise reads was necessary for perfect decoding 445KB digital files, but two  
564 orders of magnitude less only 97,938 NGS noise reads were necessary for OPN-iDR.

565

566 **ONLINE METHODS:**

567 **DNA Master Oligo Pool.** The pool (Pool 1/2--Twist Bioscience; Pool 3/4--CustomArray) was  
568 resuspended in 1x TE buffer for a final concentration of 2 ng/uL. PCR was performed using Q5  
569 High-Fidelity DNA Polymerase (NEB). Mix 10 ng of ssDNA pool (5 uL) with 2 µL of 100 µM of  
570 the forward primer and 2 µL of 100 µM of the Adaptor 2 (Adaptor 2-1), 10 µL 5x Q5 Reaction  
571 Buffer, 4 µL of 2.5 mM dNTPs, 0.5 µL Q5 High-Fidelity DNA Polymerase. Thermocycling  
572 conditions were as follows: 5 min at 98°C; 10 cycles of: 30 s at 98°C, 30 s at 56°C, 15 s at 72°C;  
573 followed by a 5 min extension at 72°C. The reaction was then purified according to the instructions  
574 in the Eastep Gel and PCR Cleanup Kit and eluted in 50 µL DNase/RNase-free water. This library  
575 was considered the master pool. All primers we used are in Supplementary Table 2.

576

577 **iDR reaction.** 10 ng of DNA oligo out of the master pool was attached to 1 µL of Streptavidin  
578 Magnetic Beads (NEB). The iDR reaction mixtures contained 1 µL of the DNA template attached  
579 to the beads (10 ng/µL), 0.25 mM dNTPs, 2.5 µL 10x NEBuffer 2, 0.08 U/µL Nt.BbvCI (NEB),  
580 0.16 U/µL KF polymerase (exo<sup>-</sup>) (Vazyme), 4 µM T4 Gene 32 Protein, 0.2 mg/mL BSA, 0.5 µM  
581 Adaptor 2 (For production of ssDNA, adaptor 2 was not added.). The mixtures were incubated at  
582 37°C for 30 min. After amplification, the specific amplicon and the template was isolated through  
583 magnetic pull-down. In the process of repeated iDR, the template attached to magnetic beads was  
584 washed by Wash/Binding buffer (0.5 M NaCl, 20 mM Tris-HCl (pH 7.5), 1 mM EDTA) twice and  
585 mixed with the above mentioned iDR reaction mixtures except for the DNA template. The process  
586 was proceeded for 10 times. To retrieve the information, the amplified products were purified and  
587 then sequenced on one Illumina Hiseq 4000 platform with 150 paired-end cycles in Novogene  
588 (Supplementary Note 3). The process of optimization in detail are given in Supplementary Note 4.

589

590 **PCR reaction.** PCR was performed using Q5 High-Fidelity DNA Polymerase and forward  
591 primer/adaptor 2 (10ng DNA master pool, 2  $\mu$ L of forward primer (100  $\mu$ M); 2  $\mu$ L of adaptor 2  
592 (100  $\mu$ M)), 10  $\mu$ L 5x Q5 reaction buffer in a 50  $\mu$ L reaction. Thermocycling conditions were as  
593 follows: 5 min at 98°C; 10 cycles of: 30 s at 98, 30 s at 58°C, 10 s at 72°C, followed by extension  
594 at 72°C for 5 min. In the repeated PCR, each subsequent PCR reaction consumed 1  $\mu$ L of the prior  
595 PCR reaction and employed 10 cycles in each 50- $\mu$ L reaction. The PCR product was purified by  
596 Eastep Gel and PCR Cleanup Kit and eluted in 50  $\mu$ L DNase/RNase-free water. Then we  
597 sequenced the PCR product on Illumina Hiseq 4000 platform.

598

599 **OPN probe.** Each probe contains two parts, from 5' to 3': a universal sequence (adaptor 2) and a  
600 oligo-specific barcode sequence. Each barcode sequence is comprised of a number of commutative  
601 strong (C or G) and weak (T or A) nucleotides according to earlier report<sup>25</sup>. Here, the length of  
602 barcode is 8 nucleotides, corresponding to a total of  $2^8 = 256$  barcode instances (Supplementary  
603 Note 5).

604 **Single-stranded oligo pool amplification (SOA).** The schematic of SOA is illustrated  
605 (Supplementary Fig. 61). We used PCR with reverse primer (adaptor 2) modified with 5'  
606 phosphate to amplify an oligonucleotide library with specific barcodes sequences. Then PCR  
607 product was degraded from 5' phosphate groups to 3' direction by lambda exonuclease, thus  
608 conversion of linear double-stranded DNA to single-stranded DNA (ssDNA). The mixture was  
609 purified by Eastep Gel and PCR Cleanup Kit. Then 10% denaturing (7 mol/L urea) PAGE was  
610 used to analyze the degraded products. Gel band quantitation was used to assess the yield of



611 ssDNA. Azurespot software was subsequently used to perform band detection, background  
612 subtraction and band quantitation. More detailed steps are in Supplementary Note 10.

613 **Oligo pool normalizing (OPN).** The schematic of OPN is illustrated (Supplementary Fig. 61 and  
614 62). The OPN probes were synthesized respectively (Supplementary Table 4 and Table 5). An  
615 equimolar mixture of OPN probes (256 or 1024), which the number of each OPN probe was  
616 equivalent to the average molar concentration of the oligo pool, was applied to capture the  
617 corresponding oligo separately. The 256/1024 oligos were mixed with 256/1024 OPN probes and  
618 hybridization buffer (10 mM Tris-EDTA, 0.5 M NaCl, and 0.05% Tween-20 (volume / volume))  
619 in 20  $\mu$ L reaction. The mixture was denatured at 95°C for 3 min and slowly cooled to 60°C at a  
620 ramp of 0.1°C/s, following kept for 2 h at 60°C using an Eppendorf Mastercycler instrument. Then,  
621 extension reaction was carried out when the target was captured by corresponding OPN probe. To  
622 ensure temperature uniformity, the pre-reaction mixture containing Taq DNA polymerase and  
623 dNTPs was also pre-heated to 60°C before adding to the ssDNA/OPN probe mixture. The resulting  
624 mixture was incubated for another 15 min at 60°C to obtain dsDNA product. Further, Exo I was  
625 added to the resulting mixture to digest the remaining ssDNA and OPN probes. After Exo I was  
626 inactivated, Streptavidin Magnetic Beads were added and incubated for another 30 min at 37°C in  
627 shaker to isolate dsDNA product. The dsDNA product attached to magnetic beads was the template  
628 for OPN-iDR. More detailed steps are in Supplementary Note 10.

629 **Data availability.** The BASIC code for encoding and decoding for both Linux and Windows and  
630 bioinformatic analysis programs may be obtained via ([https://github.com/xiaomingao/DNA-](https://github.com/xiaomingao/DNA-information-storage)  
631 [information-storage](https://github.com/xiaomingao/DNA-information-storage)). Furthermore, the original sequencing FASTQ file and the designed sequence  
632 file may be obtained via  
633 (<http://pan.tju.edu.cn:80/#/link/627DB5C9EB819984F1183D8D4A0B72E3>, Code: oZ3D).
