# Supplementary material for: Low-Bias Amplification for Robust DNA Data Readout
Source: bioRxiv or medRxiv preprint supplement (doi:10.1101/2020.02.09.940411), 2020-04-25
Supplement: Supplementary file [file media-1.pdf]

13 **SUPPLEMENTARY INFORMATION**

14

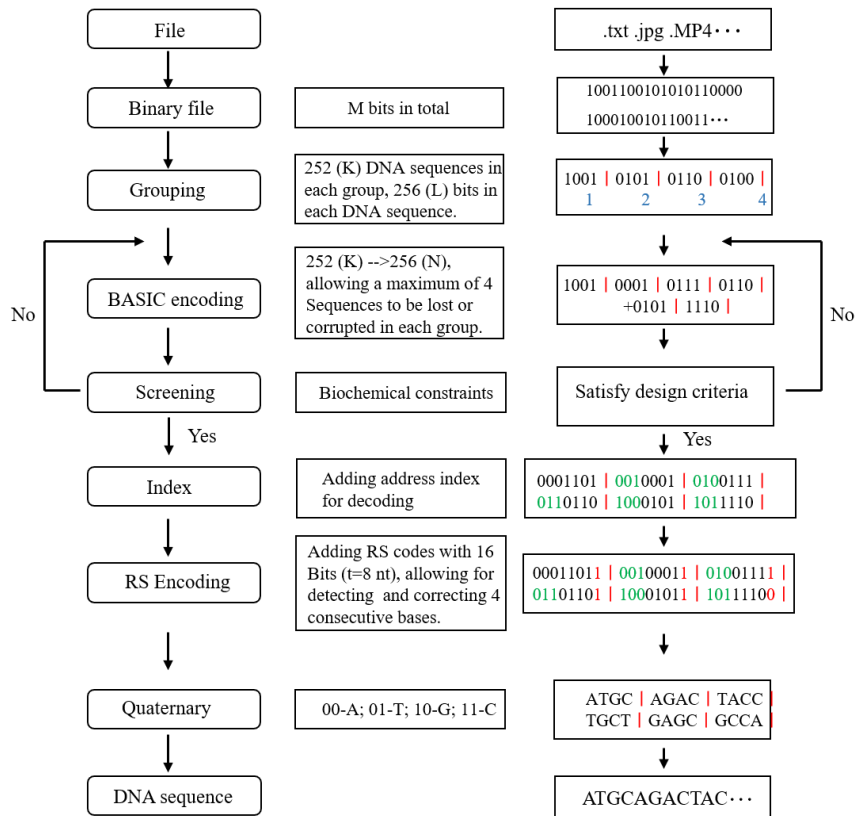

15  
16

17 **Supplementary Figure 1**

18 DNA BASIC encoding.

19 **(Left)** The process of encoding in detail.  $K$  and  $L$  are arbitrarily defined. Here,  $K$  is the number  
 20 of DNA sequence in each group;  $L$  is the length of binary data in each DNA sequence;  $K$   
 21 codewords of length  $L$  are encoded into  $N$  codewords by polynomial matrix operations on the  
 22 polynomial cycle domain  $\mathcal{C}_p$ , where  $N > K$ ,  $N - K$  is the maximum number of corrupted or lost  
 23 sequences per group. Otherwise, we would not be perfect decoding. RS codes can detect and  
 24 correct error within  $t/2$  bases in each DNA sequence (Here,  $N=256$ ,  $K=252$ ,  $L=256$ , and  $t=8$  in  
 25 the design of pool 1 and pool 2;  $N=256$ ,  $K=252$ ,  $L=192$ , and  $t=8$  in the design of pool 3). **(Right)**  
 26 Example file.

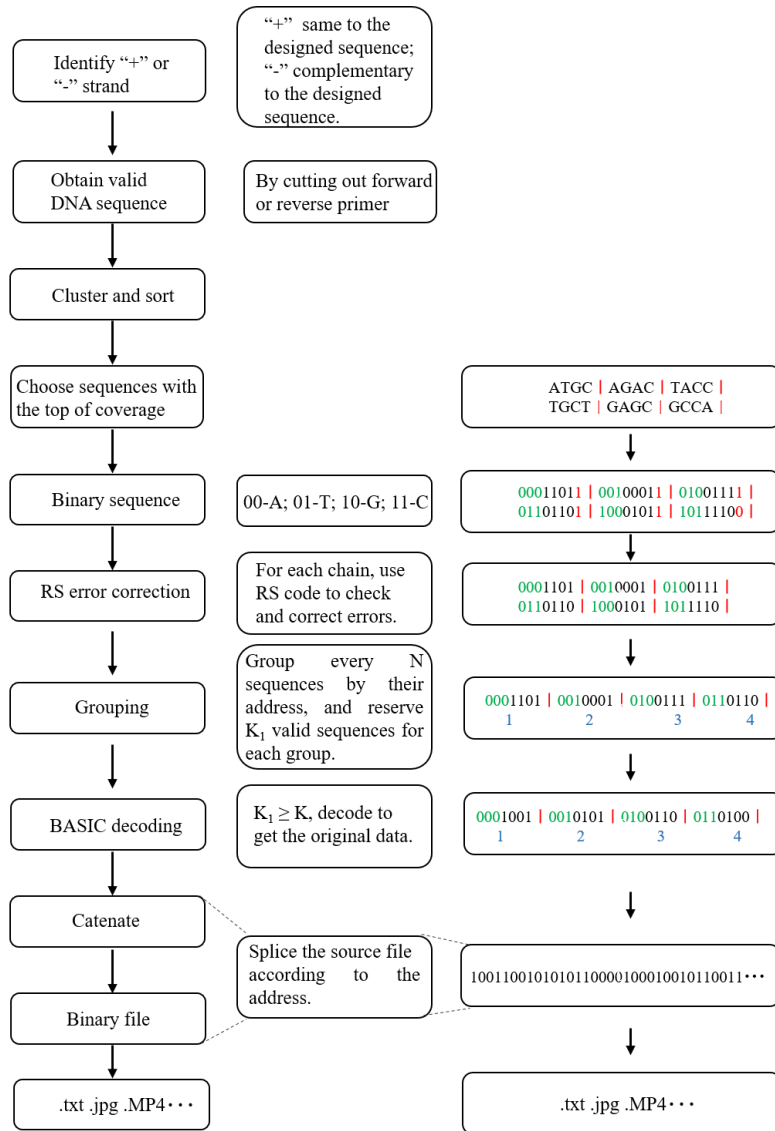

28

29

30 **Supplementary Figure 2.**

31 DNA BASIC decoding.

32

33

34

35

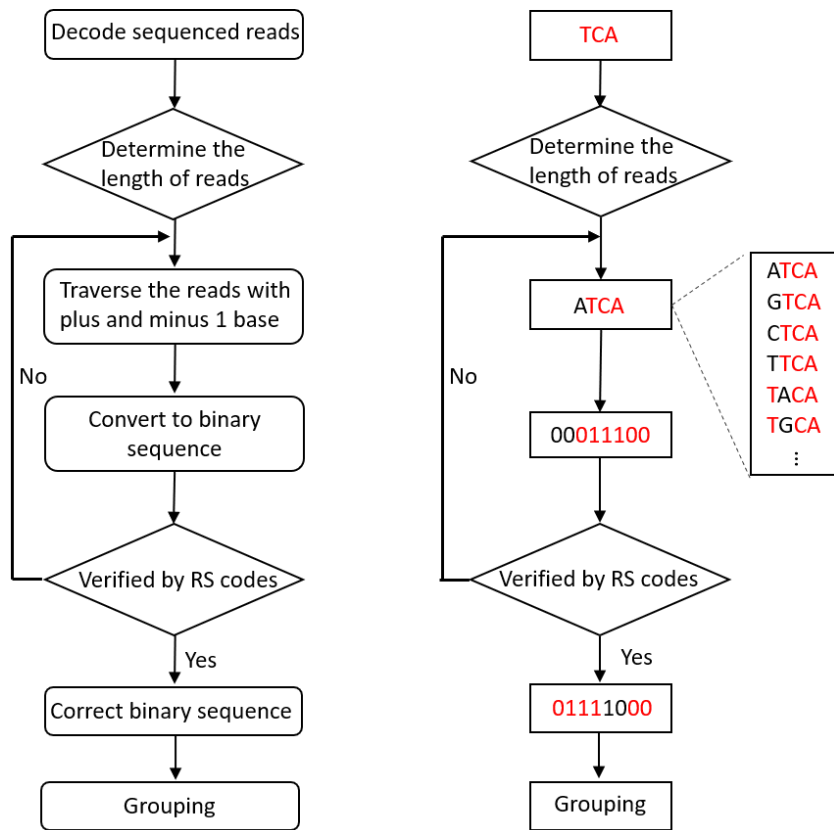

36  
37

38 **Supplementary Figure 3**

39 RS error correction.

40 **(Left)** The detail process of decoding. **(Right)** Example of repairing the DNA sequence with  
 41 one missing base. Each sequence contains  $L/2$  nt ( $L$  bits). Repair the DNA sequence with plus  
 42 and minus one base via verification of RS codes, which proceed  $4^{L/2}$  times at most.

43  
44

45

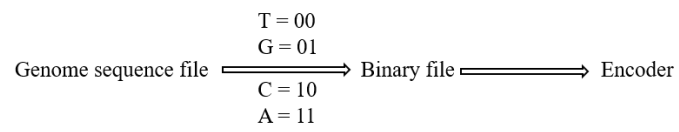

46

47

#### 48 **Supplementary Figure 4**

49 The rule that genome sequences were converted to binary information.

50 Human mitochondrial genome sequences (Chinese, Italy, Native American, and South African)

51 and genome sequences of one artificial bacteria cell (JCVI-syn.1.0) were converted to binary

52 data by the simple rule.

53

54

55

|                  | <b>Number</b> | <b>E/N logical density<br/>(bits/nt)</b> | <b>Redundancy</b> | <b>Error correction</b> |
|------------------|---------------|------------------------------------------|-------------------|-------------------------|
| Church et al.    | 0.055 million | 0.83/0.6                                 | 0                 | -                       |
| Goldman et al.   | 0.153 million | 0.29/0.19                                | 300%              | +                       |
| Grass et al.     | 0.005 million | 1.16/0.86                                | 0                 | Reed-Solomon            |
| Erlich et al.    | 0.072 million | 1.55/1.18                                | 7%                | Reed-Solomon            |
| Microsoft        | 13.4 million  | 1.1/0.8                                  | 15%               | Reed-Solomon            |
| <b>This work</b> | 0.110 million | 1.65/1.25                                | 1.56%             | Reed-Solomon            |

56

57

### 58 **Supplementary Figure 5**

59 A comparison of encoding system features to prior reported systems.

60 By BASIC code, relative high information density 1.65 bits/nt was achieved with a 1.56% of

61 coding redundancy.

62

63

64

| <b>Data</b>                       | <b>File Size</b> | <b>Number of DNA strands</b> | <b>Pool</b>        |
|-----------------------------------|------------------|------------------------------|--------------------|
| Central dogma (.jpg)              | 35 KB            | 990                          | Pool 1/2           |
| DNA helix (.gif)                  | 81 KB            | 2292                         | Pool 1/2           |
| China Classical literature (.txt) | 164 KB           | 4641                         | Pool 1/2           |
| A Brief History of Element (.txt) | 34 KB            | 962                          | Pool 1/2           |
| Panda burn incense (.rar)         | 66 KB            | 1867                         | Pool 1/2           |
| Human Mitochondrial               | 65 KB            | 768                          | Pool 1/2           |
| Bitcoin (.txt)                    | 165 KB           | 7019                         | Pool 3             |
| Dictionary of idioms (.txt)       | 70 KB            | 2978                         | Pool 3             |
| Black hole (.jpg)                 | 86 KB            | 3659                         | Pool 3             |
| Chaplin (.MP4)                    | 659 KB           | 28034                        | Pool 3             |
| JCVI-syn.0.1                      | 1054 KB          | 44838                        | Pool 3             |
| <b>Total</b>                      | <b>2924 KB</b>   | <b>109,568</b>               |                    |
| -*                                | -                | 256                          | Pool 1/2 – OPN 1.0 |
| **                                | -                | 1024                         | Pool 4 – OPN 2.0   |

65

66

### 67 **Supplementary Figure 6**

68 Files encoded within these 2.85 MB of data.

69 Both pool 1 and pool 2 contain 11,520 DNA sequences. Pool 3 contains 86,528 DNA sequences.

70

71

| Pool                 | Sample   | Perfect Decoding (Noisy reads) | Coverage (Dropout=0) | Coverage (Dropout=1.56 %) |
|----------------------|----------|--------------------------------|----------------------|---------------------------|
| Pool 1               | Free-iDR | Yes                            | 50x                  | 9x                        |
|                      | PCR      | Yes                            | 80x                  | 12.5x                     |
|                      | ss       | Yes                            | 350x                 | 18x                       |
|                      | #1 PCR   | Yes                            | -**                  | 17x                       |
|                      | #5 PCR   | Yes                            | -                    | 160x                      |
|                      | #10 PCR  | No*                            | -                    | -***                      |
|                      | #1 iDR   | Yes                            | 70x                  | 11x                       |
|                      | #5 iDR   | Yes                            | 285x                 | 12x                       |
|                      | #10 iDR  | Yes                            | 400x                 | 12x                       |
| Pool 2               | PCR      | Yes                            | 70x                  | 6x                        |
|                      | iDR      | Yes                            | 40x                  | 5x                        |
| Pool 3               | PCR      | Yes                            | -                    | 65x                       |
|                      | iDR      | Yes                            | -                    | 49x                       |
| Pool 1/2-<br>OPN 1.0 | PCR      | Yes                            | 65x                  | 27x                       |
|                      | iDR      | Yes                            | 40x                  | 13x                       |
|                      | OPN-iDR  | Yes                            | 20x                  | 8x                        |
| Pool 4-OPN<br>2.0    | PCR      | Yes                            | 223x                 | --                        |
|                      | OPN-iDR  | Yes                            | 87x                  | --                        |

73

74

75 **Supplementary Figure 7**

76 Samples with PCR or iDR amplified were whether could be successfully decoded under the  
77 condition of total sequenced reads (noisy reads) used. And the coverage was showed when the  
78 dropout rate was 0% and 1.56%.

79 Note: '\*' Total noisy reads with missing 14.1% of given sequences (11,520) could not  
80 successfully retrieve original file. '\*\*' The dropout rate was beyond 0% even when total noisy  
81 reads were used. '\*\*\*' The dropout rate was beyond 1.56% even when total noisy reads were  
82 used.



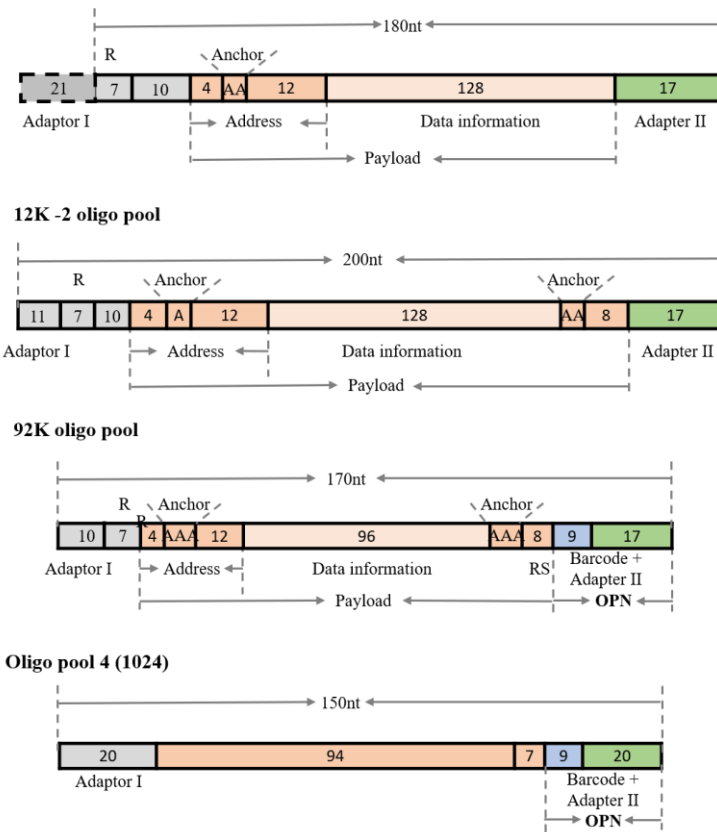

84

85

86 **Supplementary Figure 8**

87 The structure of oligos.

88 11,520 oligos (Pool 1, Twist Bioscience) without RS code were encoded and synthesized

89 (Adaptor I was added by PCR). And 11,520 oligos (Pool 2, Twist Bioscience) with RS code

90 were encoded and synthesized. 86,528 oligos (Pool 3, CustomArray) were encoded and

91 synthesized. (R: recognition sequence of nickase).

92

93

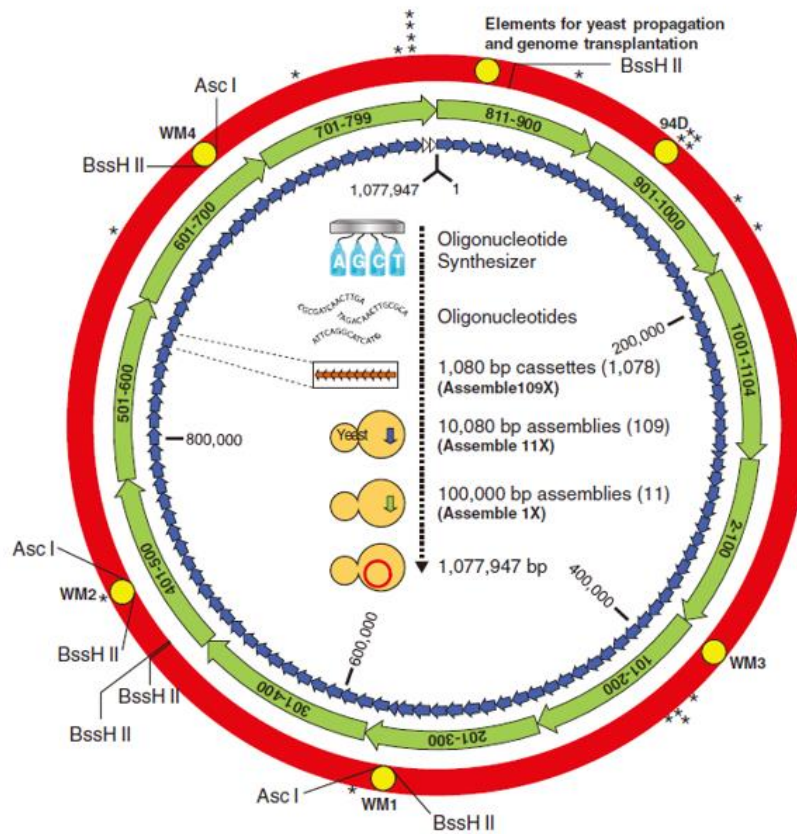

95  
96

97 **Supplementary Figure 9**

98 The genetic map of JCVI-syn1.0 reported by Gibson, D.G. et al. (Gibson, D.G. et al. Creation  
99 of a bacterial cell controlled by a chemically synthesized genome. *Science* **329**, 52-56 (2010).)

100  
101

102

| Nickase   | Recognition site                     |
|-----------|--------------------------------------|
| Nt.BstNBI | 5' GAGTCNNNNN 3'<br>3' CTCAGNNNNN 5' |
| Nt.BspQI  | 5' GCTCTTCN 3'<br>3' CGAGAAGN 5'     |
| Nt.BbvCI  | 5' CCTCAGC 3'<br>3' GGAGTCG 5'       |

103

104

105 **Supplementary Figure 10**

106 Recognition site of nickase including Nt.BstNBI, Nt.BspQI and Nt.BbvCI we used. Nickase

107 cleaves only one strand of DNA on a double-stranded DNA substrate.

108

109

| Polymerase                         | Fidelity                   |
|------------------------------------|----------------------------|
| Q5® High-Fidelity DNA Polymerase   | 1.02 x 10 <sup>-6</sup>    |
| Bst 2.0 WarmStart® DNA Polymerase  | 62 (±5) x 10 <sup>-6</sup> |
| Vent® DNA Polymerase               | 57 x 10 <sup>-6</sup>      |
| Bsu DNA Polymerase, Large Fragment | -                          |
| Klenow Fragment (3'→5' exo-)       | 100 x 10 <sup>-6</sup>     |

110

111

## 112 **Supplementary Figure 11**

113 The fidelity of polymerases we used.

114 The fidelity of Q5 High-Fidelity DNA polymerase is two orders of magnitude higher than

115 Klenow fragment (3'→5' exo-).

116

117

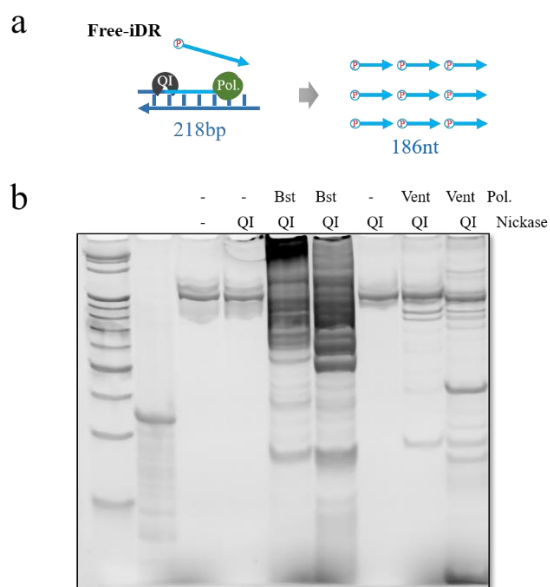

119

120

121 **Supplementary Figure 12**

122 iDR reaction under 55°C.

123 **(a)** Workflow of iDR reaction. **(b)** 10% Native PAGE results. The higher yield of by-product  
124 was occurred using Nt.BspQI and Bst for iDR. Meanwhile, the yield of iDR product using  
125 Nt.BspQI and Vent was little and the by-product was also occurred. QI: Nt.BspQI; Bst: Bst2.0  
126 DNA polymerase, large fragement (3'→5 exo<sup>-</sup>); Vent: Vent DNA polymerase.

127

128

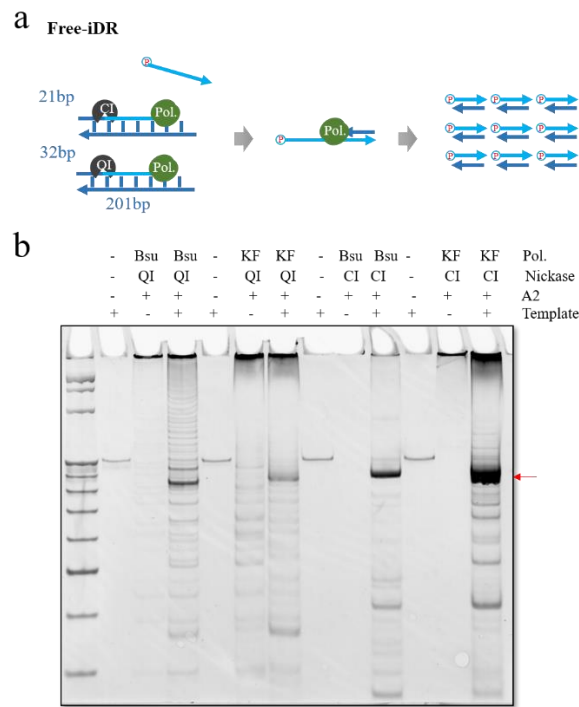

130

131

132 **Supplementary Figure 13**

133 iDR reaction under 37°C.

134 **(a)** Workflow of iDR reaction. **(b)** 10% Native PAGE results. Red arrow indicates the product  
 135 of iDR. The combination of nickases and polymerases were Nt.BspQI/Nt.BbvCI and Bsu DNA  
 136 polymerase/Klenow fragment (3'→5' exo<sup>-</sup>). QI: Nt.BspQI; CI: Nt.BbvCI; Bsu: Bsu DNA  
 137 polymerase, large fragment (3'→5' exo<sup>-</sup>); Klenow fragment (3'→5' exo<sup>-</sup>). A2: Adaptor 2.

138

139

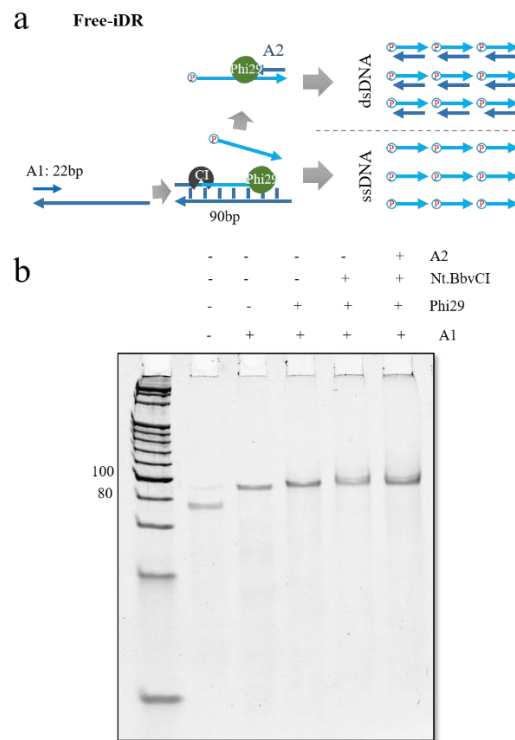

141

142

143 **Supplementary Figure 14**

144 iDR reaction under 30°C.

145 **(a)** Workflow of iDR reaction. **(b)** 12% Native PAGE results. No amplification was observed

146 on the gel. Phi29: Phi29 DNA polymerase; A1: Adaptor 1; A2: Adaptor 2.

147

148

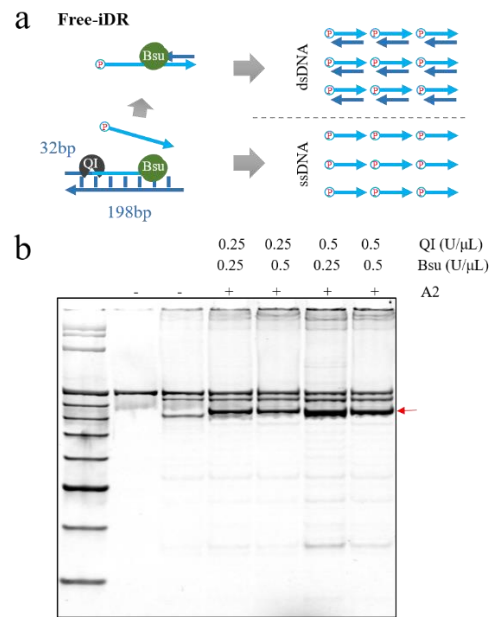

150

151

152 **Supplementary Figure 15**

153 Effect of the concentration ratio of Nt.BspQI and Bsu on iDR.

154 **(a)** Workflow of iDR reaction. **(b)** 10% Native PAGE results. Red arrow indicates the product

155 of iDR. The yield of iDR product was increased with increasing amount of QI while the by-

156 product was also increased. But the iDR product was slightly decreased as Bsu DNA

157 polymerase was increased. We considered that the optimal concentration of Nt.BspQI and Bsu

158 DNA Polymerase were 0.5 U/ $\mu$ L and 0.25 U/ $\mu$ L separately. Red arrow represents the product

159 of iDR. QI: Nt.BspQI; Bsu: Bsu DNA polymerase, large fragment (3'→5' exo-); A2: Adaptor

160 2.

161

162



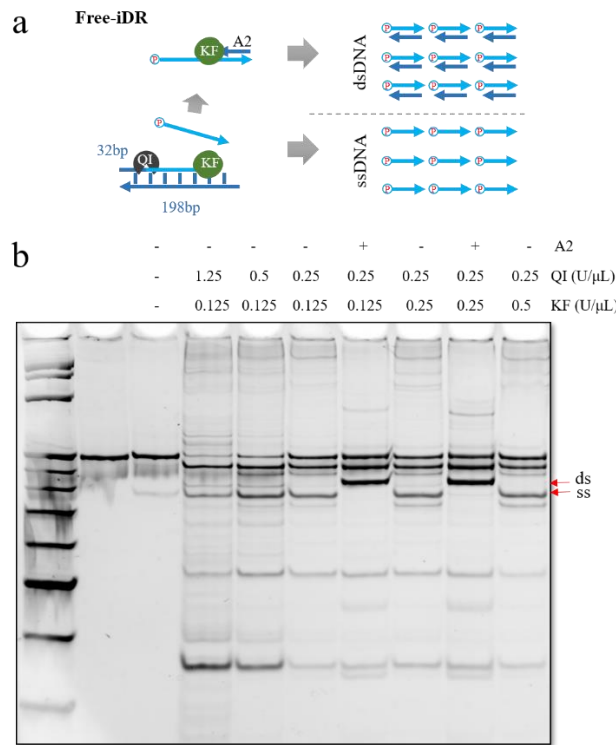

164

165

166 **Supplementary Figure 16**

167 Effect of the concentration ratio of Nt.BspQI and KF(exo<sup>-</sup>) on iDR.

168 **(a)** Workflow of iDR reaction. **(b)** 10% Native PAGE results. ss: single-strand DNA product of  
 169 iDR; ds: double-strand DNA product of iDR. The yield of iDR product was increased with  
 170 increasing amount of QI rather than KF. Here, the highest yield product of iDR was observed  
 171 at 0.25 U/μL Nt.BspQI and 0.25 U/μL Klenow fragment (3'→5' exo<sup>-</sup>). Red arrow represents  
 172 the product of iDR. QI: Nt.BspQI; KF: klenow fragment (3'→5' exo<sup>-</sup>); A2: Adaptor 2.

173

174

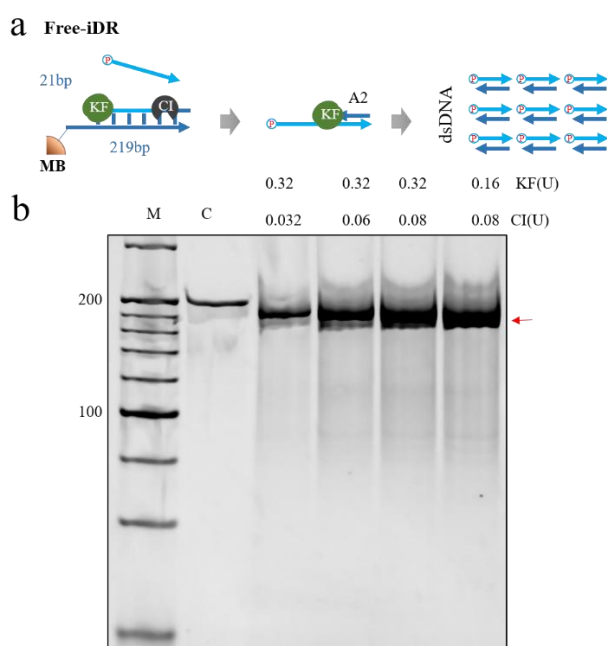176  
177178 **Supplementary Figure 17**179 Effect of the concentration ratio of Nt.BbvCI and KF ( $3' \rightarrow 5'$  exo<sup>-</sup>) on iDR.

180 **(a)** Workflow of iDR reaction. **(b)** 10% Native PAGE results. M: 20 bp DNA Ladder; C: the  
 181 template of iDR. The yield of iDR product was increased with increasing amount of CI. But  
 182 the iDR product was kept constant as Klenow fragment DNA polymerase was decreased. Here,  
 183 the highest yield product of iDR was observed at 0.08 U/ $\mu$ L Nt.BbvCI and 0.16 U/ $\mu$ L Klenow  
 184 fragment ( $3' \rightarrow 5'$  exo<sup>-</sup>). The concentration of Nt.BbvCI and KF was applied in subsequent  
 185 assays. Red arrow represents the product of iDR. CI: Nt.BbvCI; KF: Klenow fragemen( $3' \rightarrow 5'$   
 186 exo<sup>-</sup>).

187  
188

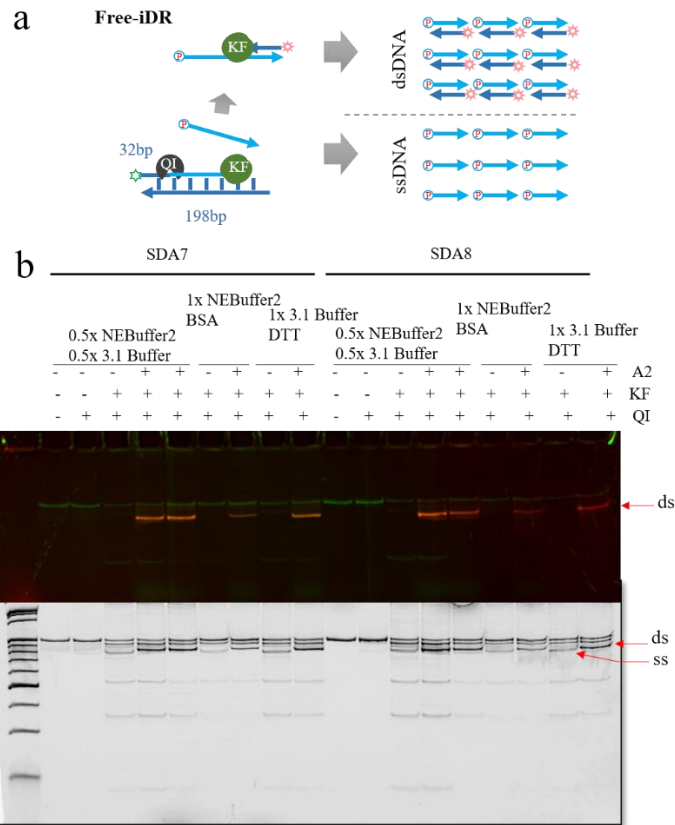

190

191

192 **Supplementary Figure 18**

193 Effect of reaction buffer on iDR.

194 **(a)** Workflow of iDR reaction. **(b)** 10% Native PAGE results. The DNA with 5'-FAM was used

195 as a template in the iDR reaction. The adaptor 2 with Cy5 was used to generate dsDNA product

196 with red fluorescence of iDR. Red arrow indicates the product of iDR. QI: Nt.BspQI; KF:

197 Klenow fragment (3'→5' exo-); A2: Adaptor 2.

198

199

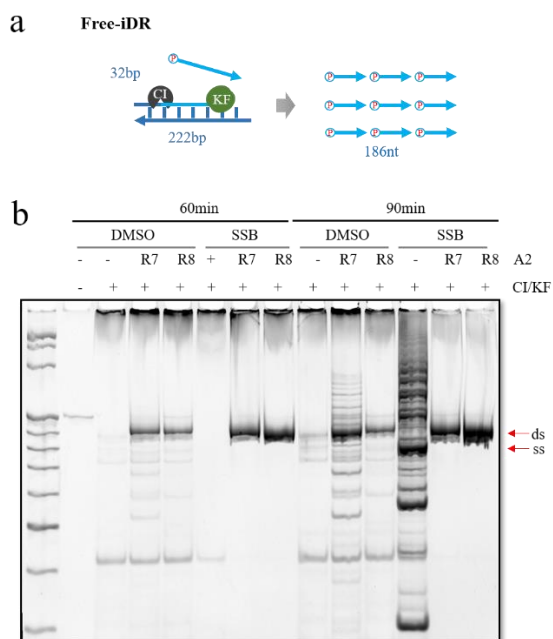

201  
202

203 **Supplementary Figure 19**

204 Effects of DMSO and SSB on iDR.

205 **(a)** Workflow of iDR reaction. **(b)** 10% Native PAGE results. The yield of iDR product was  
 206 increased while the by-product was decreased with addition of T4 Gene 32 protein. Red arrow  
 207 represents the product of iDR. ss: single-strand DNA product of iDR; ds: double-strand DNA  
 208 product of iDR. CI: Nt.BbvCI; KF: Klenow fragment(3'→5' exo<sup>-</sup>); A2: Adaptor 2.

209  
210

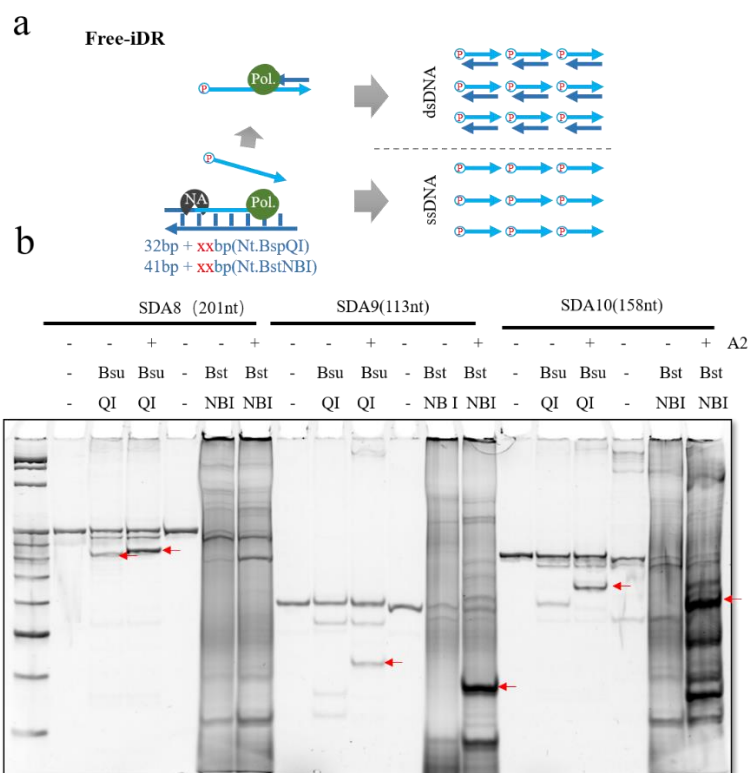

212

213

214 **Supplementary Figure 20**

215 Effects of fragment length on iDR.

216 **(a)** Workflow of iDR reaction. **(b)** 10% Native PAGE results. The iDR reaction using Nt.BspQI

217 and Bsu DNA polymerase is not related to the length of DNA fragment. However, the iDR

218 reaction using Nt.BstNBI and Bst DNA polymerase, large fragment has a preference for the

219 DNA with less than 200bp. Red arrow represents the product of iDR. QI: Nt.BspQI; NBI:

220 Nt.BstNBI; KF: Klenow fragment (3'→5' exo<sup>-</sup>); Bsu: Bsu DNA polymerase, large fragment

221 (3'→5' exo<sup>-</sup>); A2: Adaptor 2.

222

223

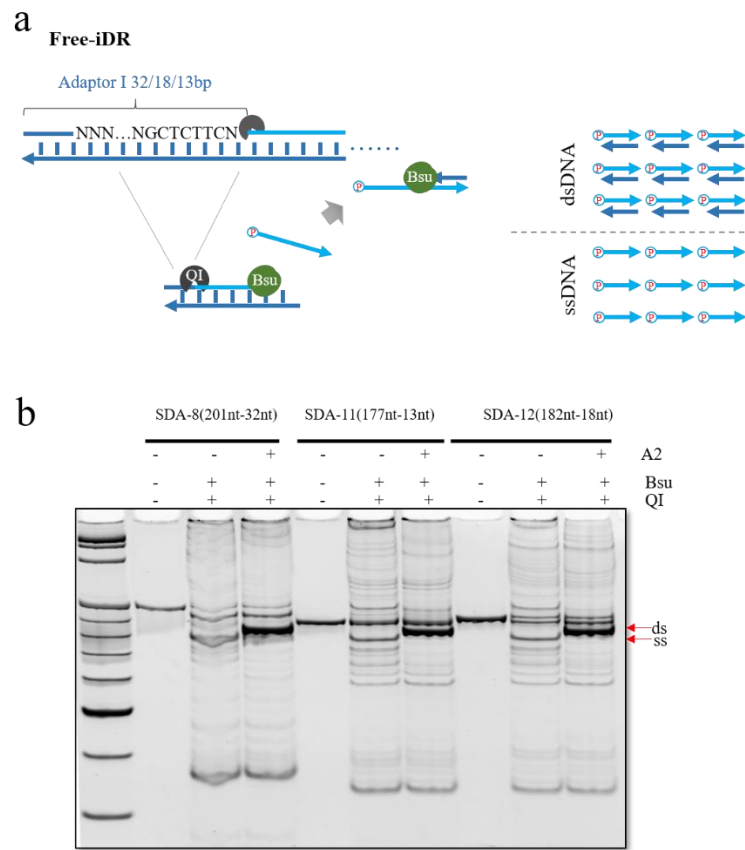

225

226

227 **Supplementary Figure 21**

228 Effects the length of adaptor I on iDR.

229 **(a)** Workflow of iDR reaction. **(b)** 10% Native PAGE results. The minimum length of Adaptor

230 I was 13 nt which was enough stable for avoiding the adaptor I dissociating. Red arrow

231 represents the product of iDR; ss: single-strand DNA product of iDR; ds: double-strand DNA

232 product of iDR. QI: Nt.BspQI; Bsu: Bsu DNA polymerase, large fragment (3'→5' exo<sup>-</sup>); A2:

233 Adaptor 2.

234

235

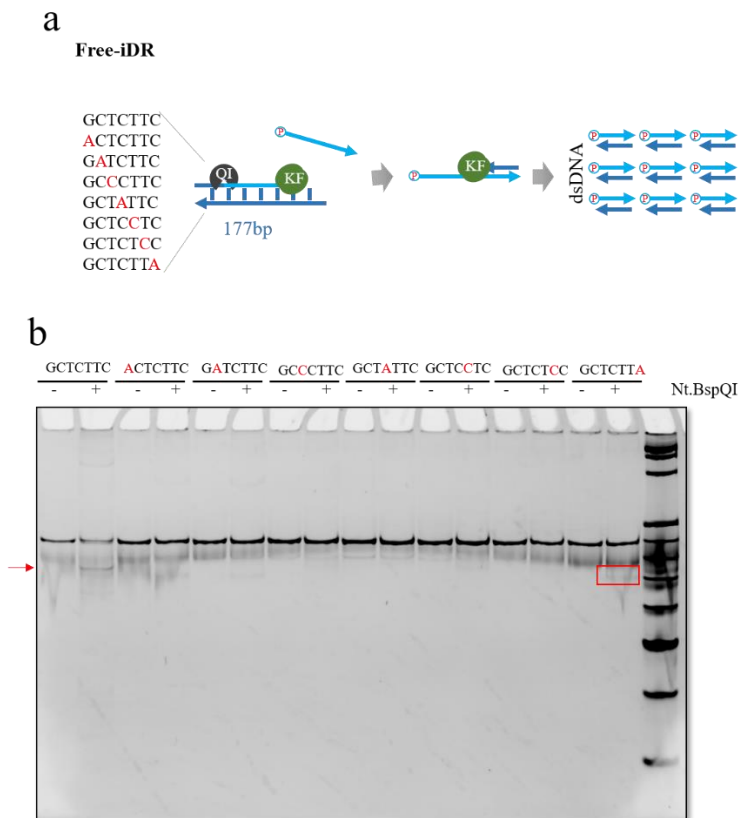

237

238

239 **Supplementary Figure 22**

240 Effect of variations in recognition region on the nicking efficiency of Nt.BspQI.

241 **(a)** Workflow of iDR reaction. **(b)** 10% Native PAGE results. The iDR product was observed

242 when GCTCTTC, recognition sequence of Nt.BspQI, was converted into GCTCTTA. It

243 demonstrated that Nt.BspQI was unspecific to recognize GCTCTTC. Thus, GCTCTTN was

244 evaded in the sequence we encoded. Red arrow represents the product of iDR.

245

246

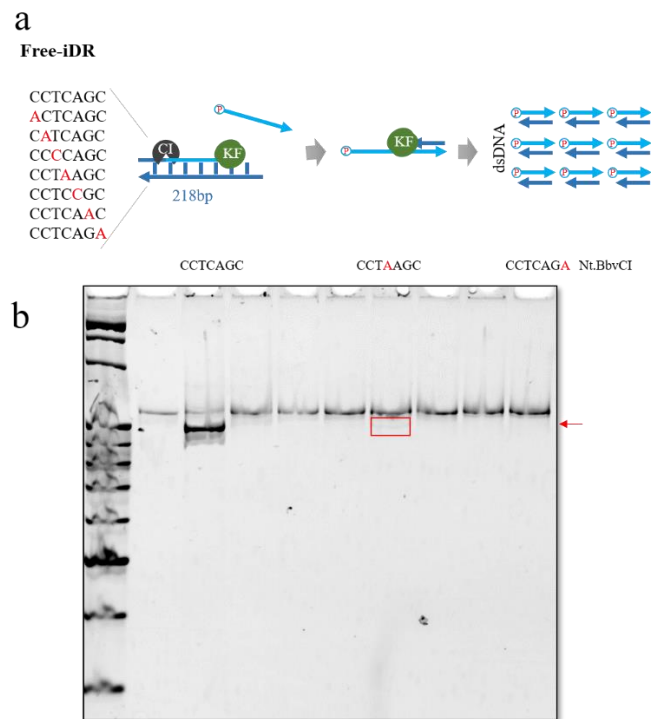248  
249250 **Supplementary Figure 23**

251 Effect of variations in recognition region on the nicking efficiency of Nt.BbvCI.

252 **(a)** Workflow of iDR reaction. **(b)** 10% Native PAGE results. The iDR product was observed  
 253 when CCTCAGC, recognition sequence of Nt.BspQI, was converted into CCTAAGC. It  
 254 demonstrated that Nt.BspQI was unspecific to recognize CCTCAGC. Thus, CCTNAGC was  
 255 evaded in the sequence we encoded. Red arrow represents the product of iDR.

256



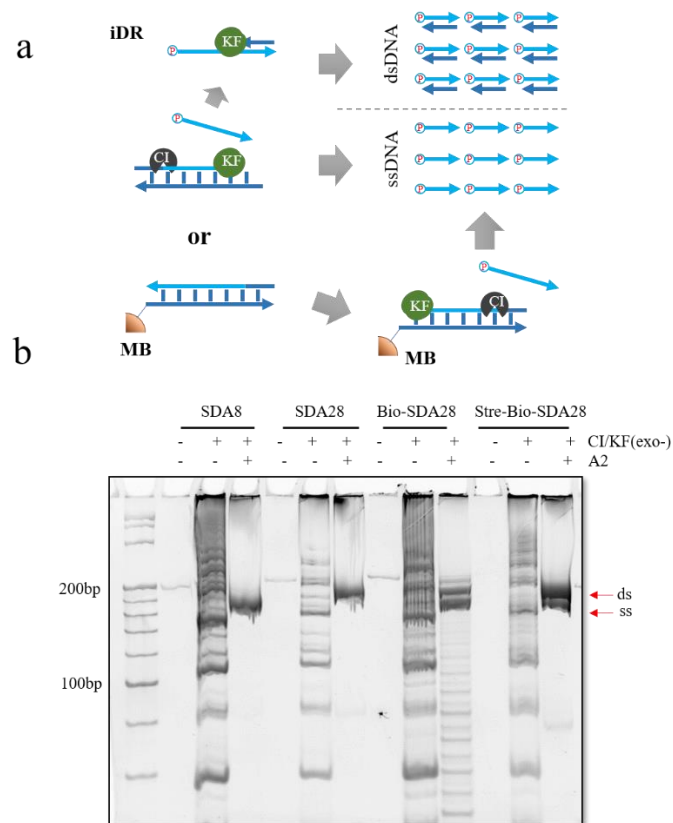

258

259

260 **Supplementary Figure 24**

261 Effect of templates attached to the magnetic beads on iDR.

262 **(a)** Workflow of iDR reaction. **(b)** 10% Native PAGE results. DNA templates modified with

263 biotin and attached to the magnetic beads had no influence on iDR reaction. Red arrow

264 represents the product of iDR. ss: single-strand DNA product of iDR; ds: double-strand DNA

265 product of iDR. CI: Nt.BbvCI; KF: Klenow fragment(3'→5' exo-); Bio-SDA28: the DNA

266 (SDA28) modified with biotin; Stre-Bio-SDA28: the DNA template (SDA28) was attached to

267 the streptavidin magnetic beads by the interaction of streptavidin and biotin; A2: Adaptor 2.

268

269

270

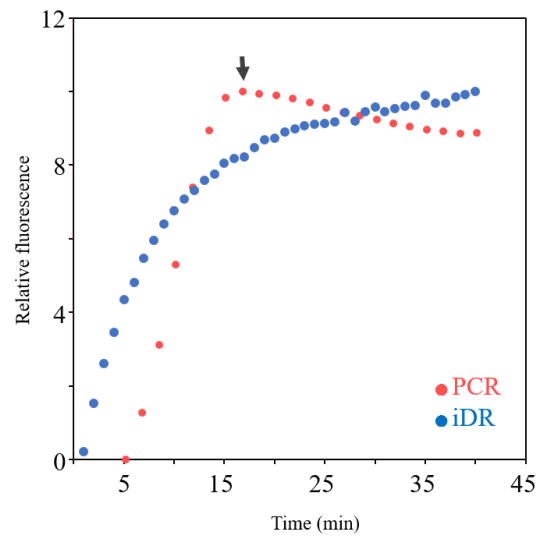

271

272

### 273 **Supplementary Figure 25**

274 Real-time PCR and iDR. Black arrow represents the tenth cycle of PCR.

275 The iDR reaction mixtures contained 1  $\mu\text{L}$  of the template (10  $\text{ng}/\mu\text{L}$ ), 0.25  $\text{mM}$  dNTPs, 2.5

276  $\mu\text{L}$  10x NEBuffer 2, 0.08  $\text{U}/\mu\text{L}$  Nt.BbvCI, 0.16  $\text{U}/\mu\text{L}$  KF polymerase (exo<sup>-</sup>), 4  $\mu\text{M}$  SSB, 0.2

277  $\text{mg}/\text{mL}$  BSA, 0.5  $\mu\text{M}$  adaptor 2 (For production of ssDNA, adaptor was not added.) and 0.5  $\mu\text{L}$

278 3.75xSYBR Green I. The mixtures were incubated at 37°C for 30 min and detected every 30s.

279 PCR was performed using Q5 High-Fidelity DNA Polymerase and forward primer/adaptor 2

280 (10ng DNA master pool, 2  $\mu\text{L}$  of forward primer (100  $\mu\text{M}$ ); 2  $\mu\text{L}$  of adaptor 2 (100  $\mu\text{M}$ )), 1  $\mu\text{L}$

281 3.75x SYBR Green I, and 10  $\mu\text{L}$  5x Q5 reaction buffer in a 50  $\mu\text{L}$  reaction. Thermocycling

282 conditions were as follows: 5 min at 98°C; 10 cycles of: 30 s at 98, 30 s at 58°C, 10 s at 72°C

283 (detection), followed by extension at 72°C for 5 min.

284

285

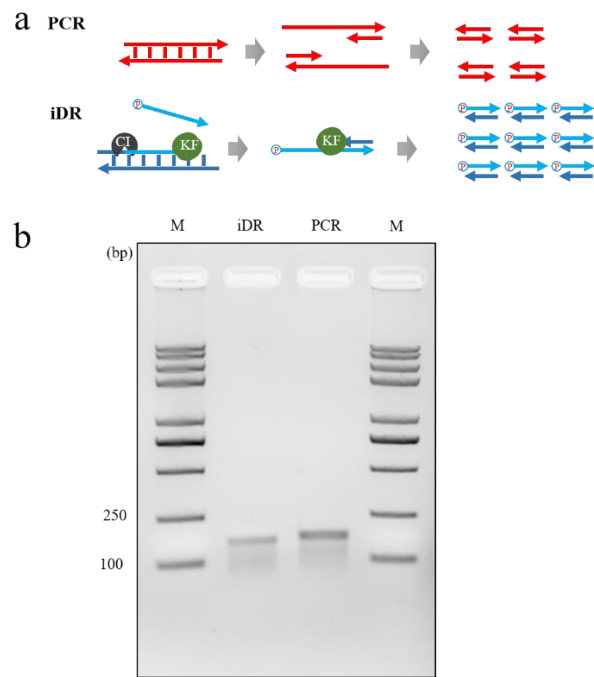

286  
287

288 **Supplementary Figure 26**

289 iDR product and PCR product.

290 **(a)** PCR and iDR reaction. **(b)** 2% agarose gel results. Lane M: Trans2K Plus II DNA Maker;  
291 lane iDR: double-strand DNA product of iDR; lane PCR: PCR product.

292

293

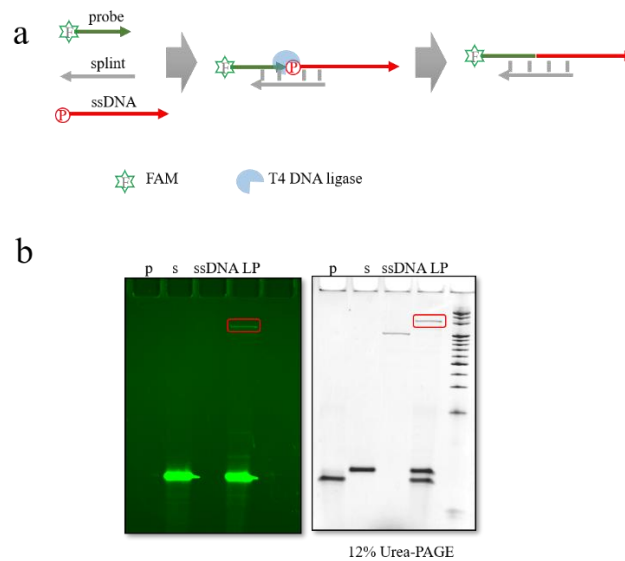

295

296

297 **Supplementary Figure 27**

298 5'-phosphate group of iDR ssDNA product confirmed through ligation assay.

299 **(a)** Workflow of ligation. **(b)** Verification of 5'-phosphate group of iDR product, as shown on  
 300 12% TBE-urea gel. Lane p: probe; lane s: splint; Lane ssDNA: single-strand product of iDR;  
 301 lane LP: Ligation product (LP) was generated in the red box. The ligation reaction was carried  
 302 out in 20  $\mu$ L reaction mixtures containing 0.5  $\mu$ M of the probe with FAM at 5' terminal, 0.5  
 303  $\mu$ M of the splint, 4  $\mu$ L of the ssDNA (9 ng/ $\mu$ L), 2  $\mu$ L of 10xT4 DNA ligase reaction buffer, 25  
 304 U T4 DNA ligase. Before adding T4 DNA ligase, the mixture was annealed from 95°C to 25°C  
 305 at a ramp of 0.1°C/s. After annealing, T4 DNA ligase was added to the mixture and incubated  
 306 at 37°C for 3 h. The reaction was terminated by incubation at 65°C for 10 min. Image of the  
 307 gel was recorded using a Cy3 channel of the C300 Imaging System. Then the gel was stained  
 308 with SYBR Gold for 20 min at room temperature, followed by recorded using UV channel of  
 309 the C300 Imaging System.

310

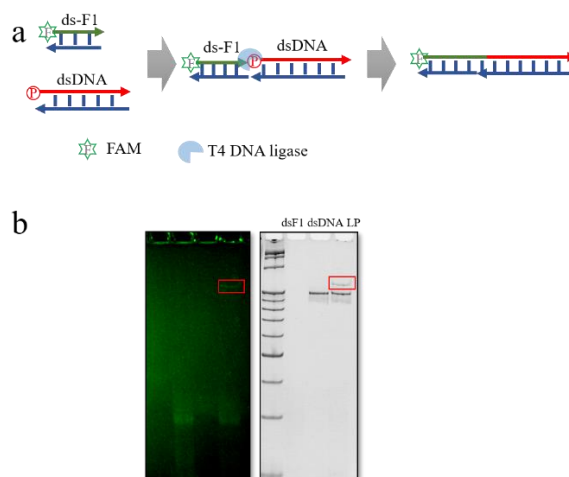

311

312

### 313 **Supplementary Figure 28**

314 5'-phosphate group of iDR dsDNA product confirmed through ligation assay.

315 **(a)** Workflow of ligation. **(b)** Verification of 5'-phosphate group of iDR product, as shown on

316 12% native PAGE. Ligation product (LP) was generated in the red box. The ligation reaction

317 was carried out in 20  $\mu$ L reaction mixtures containing 0.5  $\mu$ M of the probe (ds-probe) with

318 FAM at 5' terminal, 4  $\mu$ L of the dsDNA (20 ng/ $\mu$ L), 2  $\mu$ L of 10xT4 DNA ligase reaction buffer,

319 25 U T4 DNA ligase. Before adding T4 DNA ligase, the mixture was annealed from 95°C to

320 25°C at a ramp of 0.1°C/s. After annealing, T4 DNA ligase was added to the mixture and

321 incubated at 16°C for overnight. The reaction was terminated by incubation at 65°C for 10 min.

322 Image of the gel was recorded using a Cy3 channel of the C300 Imaging System. Then the gel

323 was stained with SYBR Gold for 20 min at room temperature, followed by recorded using UV

324 channel of the C300 Imaging System.

325

326

327

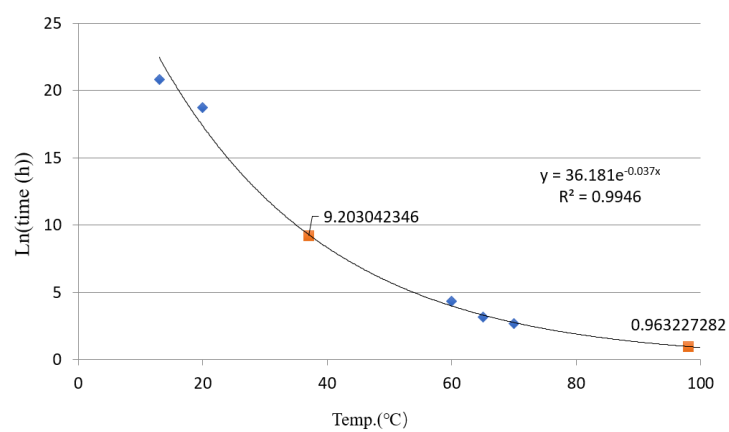

328

329

### 330 **Supplementary Figure 29**

331 The temperature – logarithm of time curve of DNA decay (Supplementary Note 8).

332

333

334

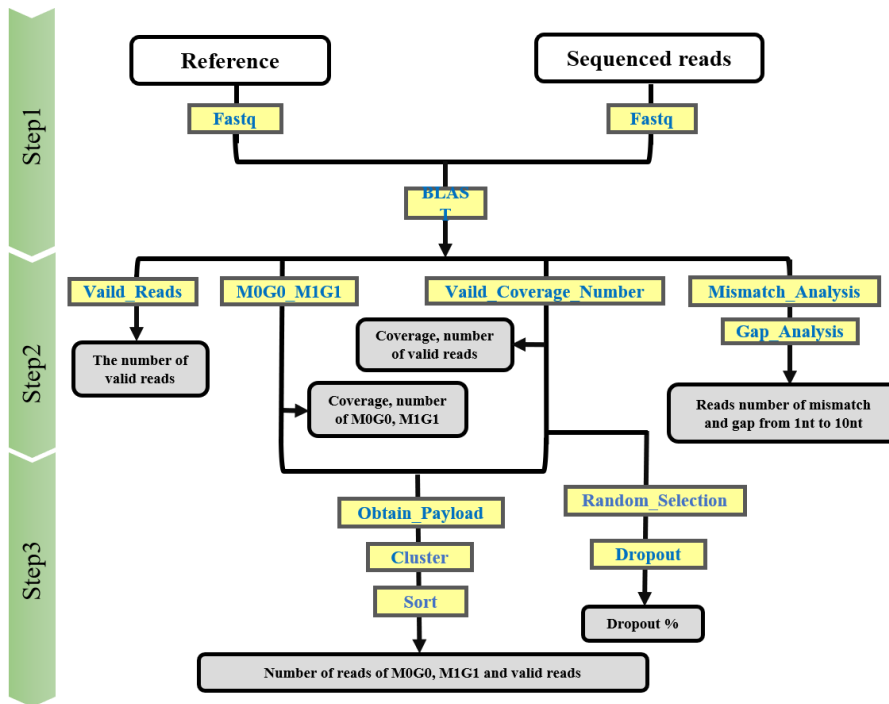

335

336

337 **Supplementary Figure 30**

338 The workflow of bioinformatic statistical analysis.

339 Bioinformatics analysis programs are in the yellow boxes. Results generated by bioinformatics

340 analysis programs are gray boxes.

341

342

343

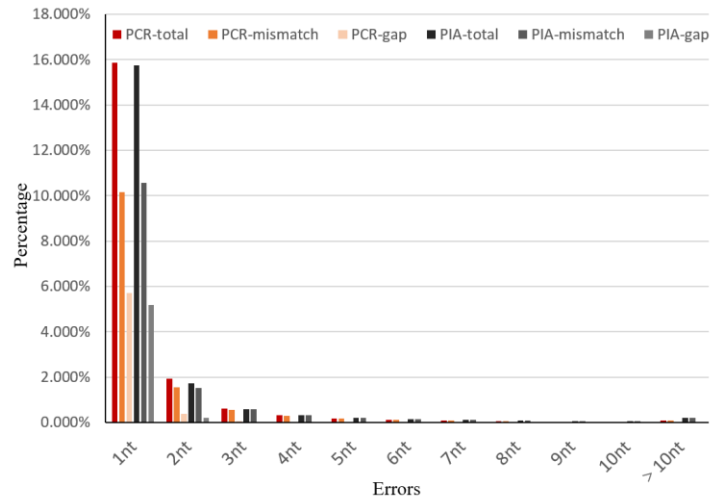

344  
345

346 **Supplementary Figure 31**

347 Errors containing mismatch and indel in #1 PCR and #1 iDR.

348 The percentage of the reads with errors containing base substitution and indel among total reads  
349 respectively in #1 PCR and #1 iDR (Pool 1, Twist Bioscience).

350  
351



352

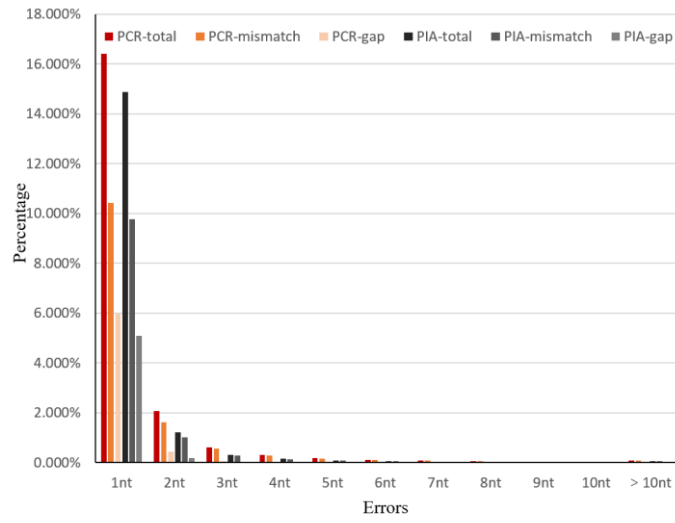

353  
354

355 **Supplementary Figure 32**

356 Errors containing mismatch and indel in #5 PCR and #5 iDR.

357 The percentage of the reads with errors containing substitution and indel among total reads  
358 respectively in #5 PCR and #5 iDR (Pool 1, Twist Bioscience).

359

360

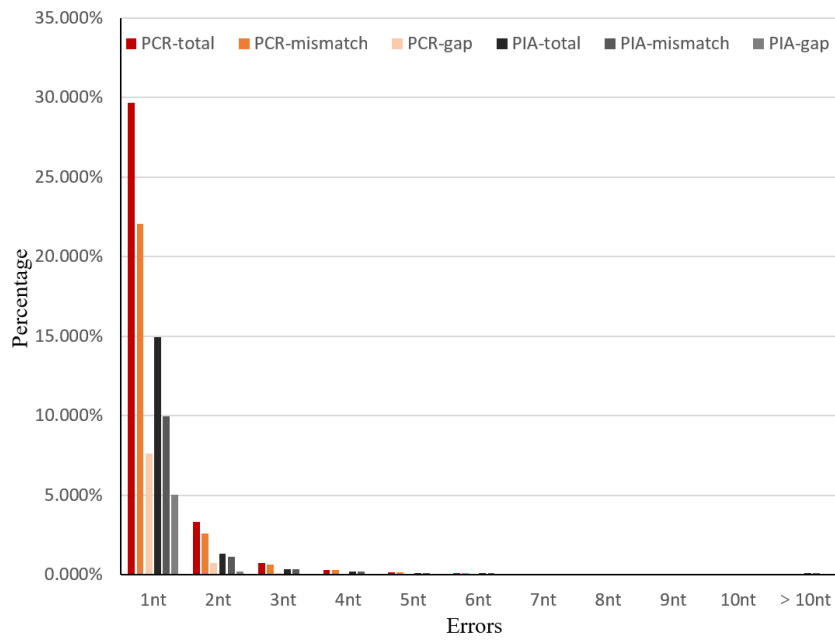

361

362

363 **Supplementary Figure 33**

364 Errors containing mismatch and indel in #10 PCR and #10 iDR.

365 The percentage of the reads with errors containing substitution and indel among total reads  
366 respectively in #10 PCR and #10 iDR (Pool 1, Twist Bioscience).

367

368

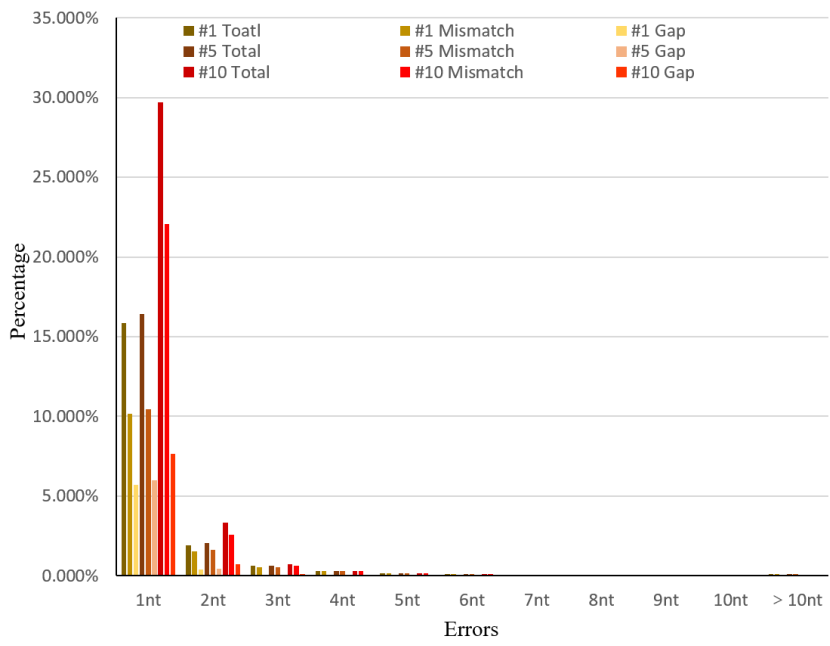

369

370

371 **Supplementary Figure 34**

372 Errors containing mismatch and indel in #1, #5 and #10 PCR.

373 The percentage of the reads with errors containing substitution and indel among total reads

374 respectively in repetitive #1, #5, #10 PCR (Pool 1, Twist Bioscience).

375

376

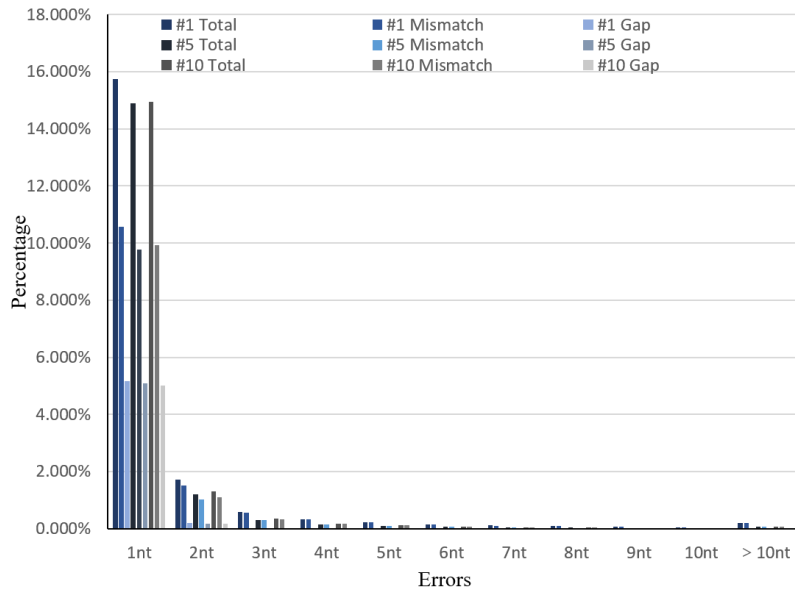

377

378

379 **Supplementary Figure 35**

380 Errors containing mismatch and indel in #1, #5 and #10 PCR.

381 The percentage of the reads with errors containing substitution and indel among total reads

382 respectively in #1, #5, #10 iDR (Pool 1, Twist Bioscience).

383

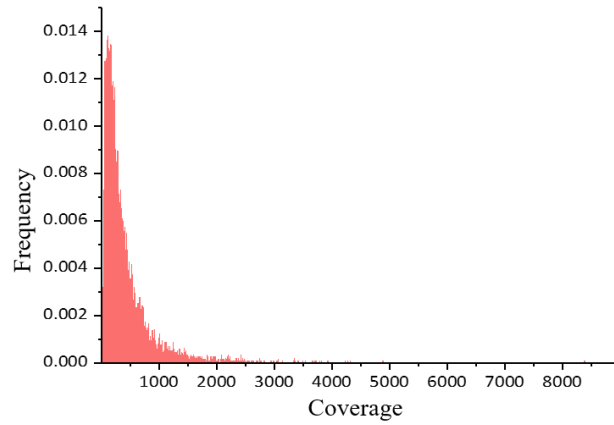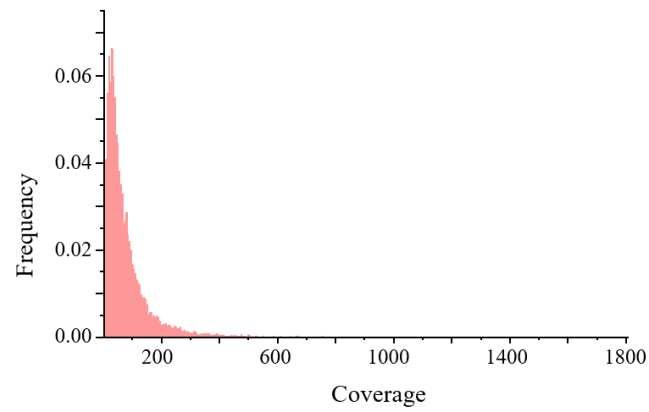

385

386

387 **Supplementary Figure 36**

388 The distribution of the number of reads per each given sequences of PCR.

389 The distribution of the number of reads per each given sequence of total sequenced reads (the

390 upper portion) and per million sequenced reads (the lower part) of PCR-amplified the oligo

391 pool (Pool 1, Twist Bioscience).

392

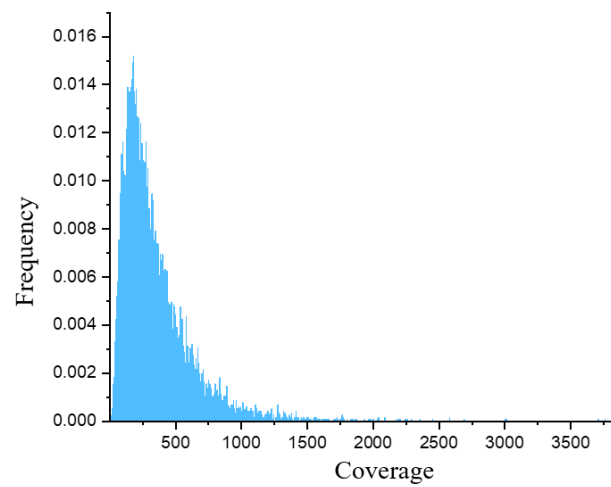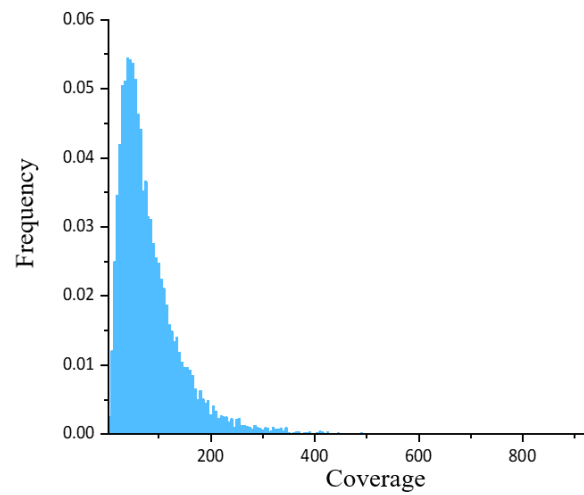

394

395

396 **Supplementary Figure 37**

397 The distribution of the number of reads per each given sequence of iDR.

398 The distribution of the number of reads per each given sequence of total sequenced reads (the

399 upper portion) and per million sequenced reads (the lower part) of iDR-amplified the oligo

400 pool (Pool 1, Twist Bioscience).

401

402

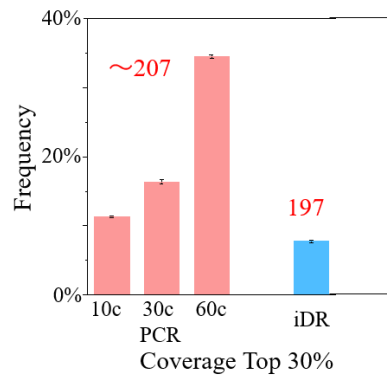

403

404 **Supplementary Figure 38**

405 The percentage of reads with having a large coverage (the top 30% of coverage).

406 The percentage increased significantly from 11.31% to 34.52% as the number of PCR cycles  
407 increased from 10 to 60 while the number of these reads stabilized at 207. Meanwhile the  
408 number of these reads with a large coverage was 197 and these reads accounted for 7.77% of  
409 per million sequenced reads. Error bars represent the mean  $\pm$  s.d., where  $n = 3$ .

410

411

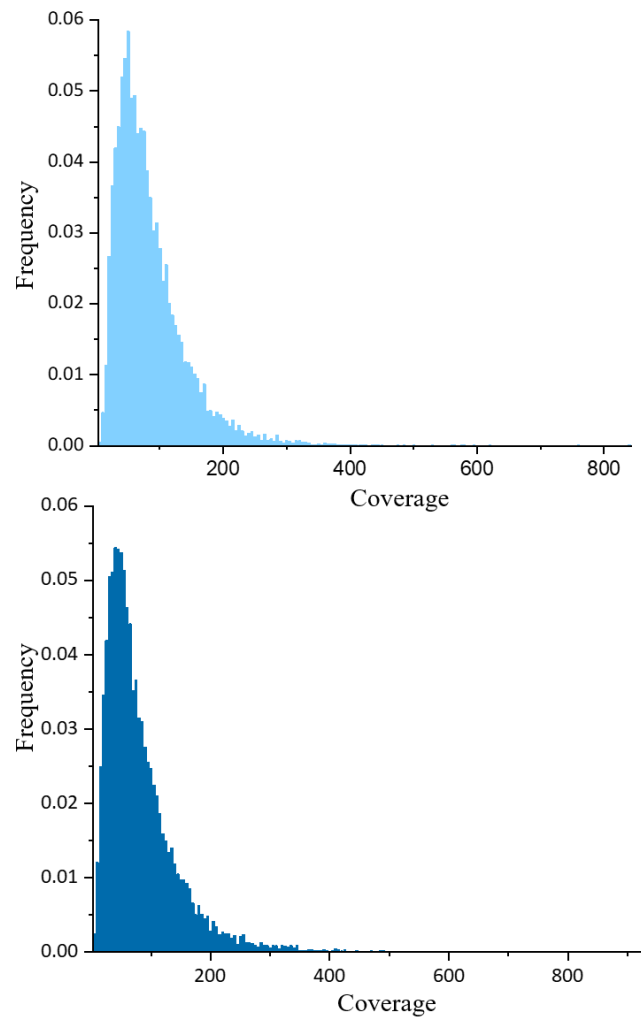

412

413

414 **Supplementary Figure 39**

415 The distribution of the number of reads per each given sequence per million sequenced reads  
416 of free-iDR and iDR.

417 The distribution of the number of reads per each given sequence of free-iDR (without  
418 Streptavidin magnetic beads, the upper portion) and iDR-amplified (the lower part) the oligo  
419 pool (Pool 1, Twist Bioscience).

420



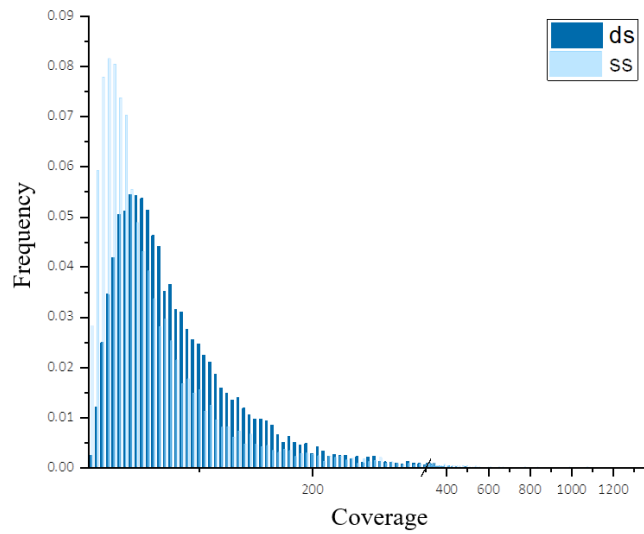

421

422

423 **Supplementary Figure 40**

424 The distribution of the number of reads per each given sequence per million sequenced reads  
425 of double-strand DNA product (blue) and single-strand DNA product (light blue) of iDR  
426 amplified the oligo pool (Pool 1, Twist Bioscience).

427

428

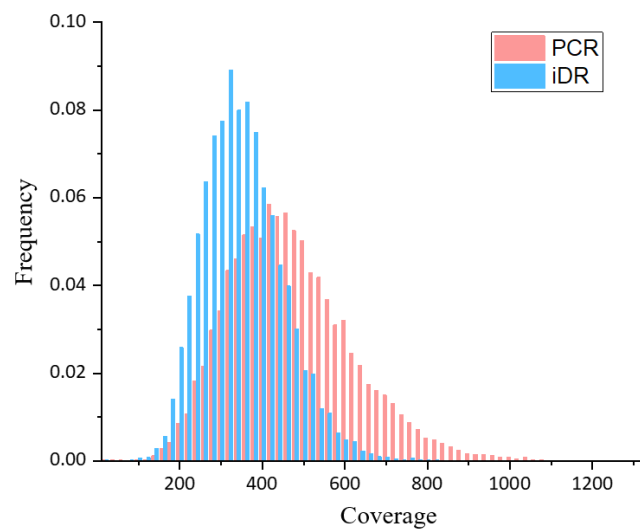

429

430

431 **Supplementary Figure 41**

432 The distribution of the number of reads per each given sequence of PCR and iDR-amplified  
433 the oligo pool (Pool 2, Twist Bioscience).

434

435

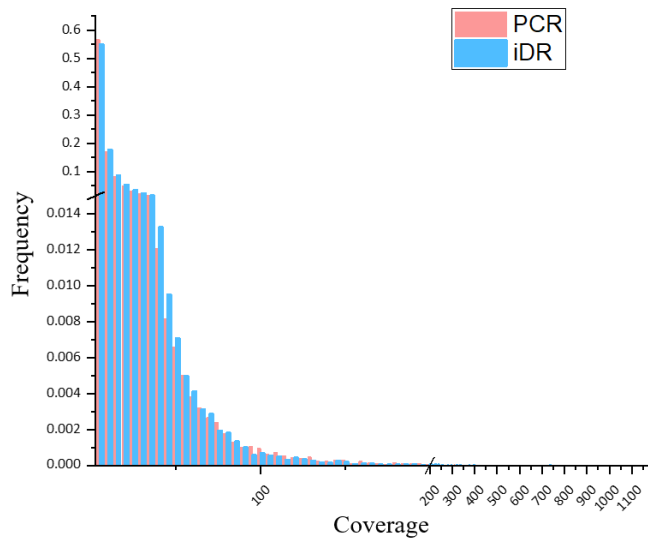

436

437

438 **Supplementary Figure 42**

439 The distribution of the number of reads per each given sequence of PCR and iDR-amplified  
440 the oligo pool (Pool 3, CustomArray).

441

442

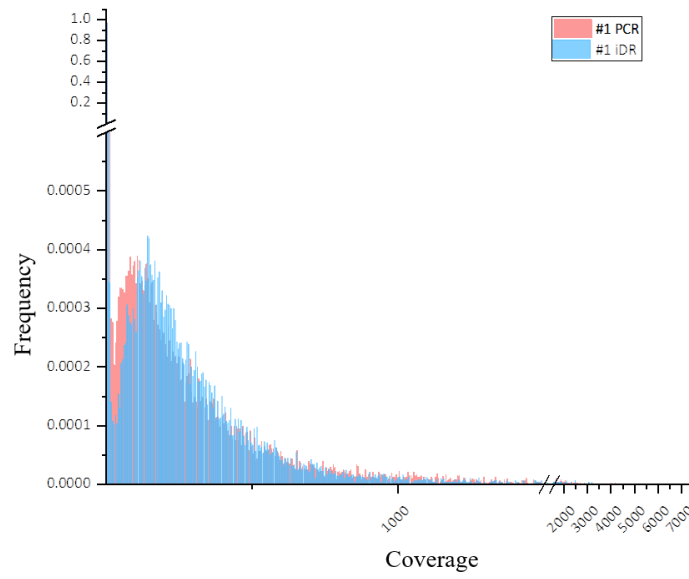

443

444

445 **Supplementary Figure 43**

446 The distribution of the number of reads of PCR and iDR –amplified the oligo pool (Pool 1,  
447 Twist Bioscience).

448

449

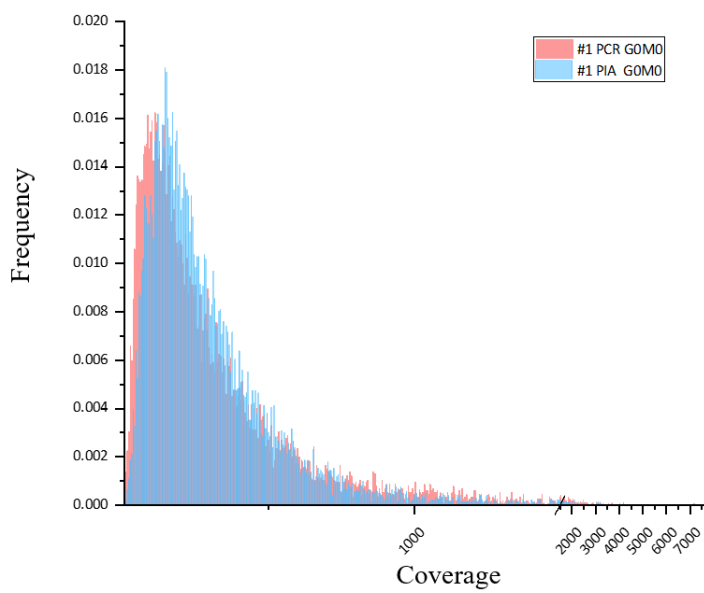

450

451

452 **Supplementary Figure 44**

453 The distribution of the number of M0G0 reads of PCR and iDR –amplified the oligo pool (Pool

454 1, Twist Bioscience).

455

456

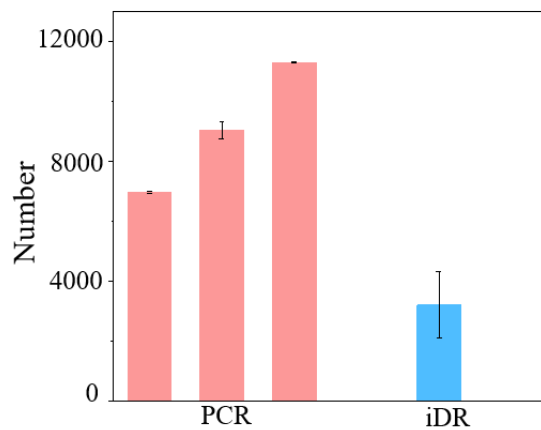

457

458 **Supplementary Figure 45**

459 The number of sequences affected by the M1G1 in the process of decoding.

460 The number increased significantly from  $6958 \pm 32$  to  $11289 \pm 8$  as the number of PCR cycles

461 increased from 10 to 60. The number of iDR was kept at  $3216 \pm 1111$ . Error bars represent the

462 mean  $\pm$  s.d., where  $n = 3$ .

463

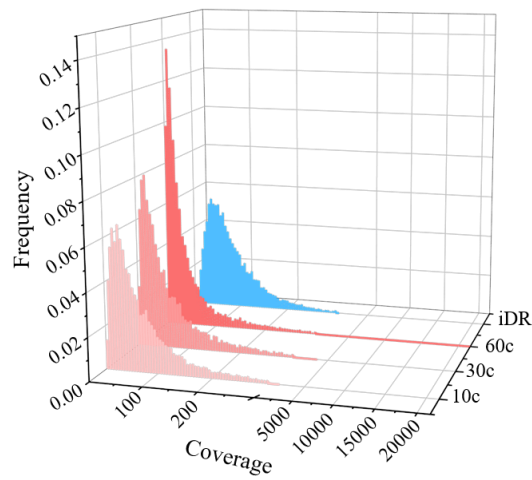

465

466 **Supplementary Figure 46**

467 The distribution of the number of reads per each given sequence per million sequenced reads  
468 of PCR and iDR-amplified the oligo pool (12K-1 oligo pool, Twist Bioscience).

469 The distribution of the number of reads per each given sequence per million sequenced reads  
470 of PCR with 10 cycles (light red), PCR with 30 cycles (red), PCR with 60 cycles (dark red)  
471 and iDR (blue)-amplified the oligo pool (Pool 1, Twist Bioscience).

472

473

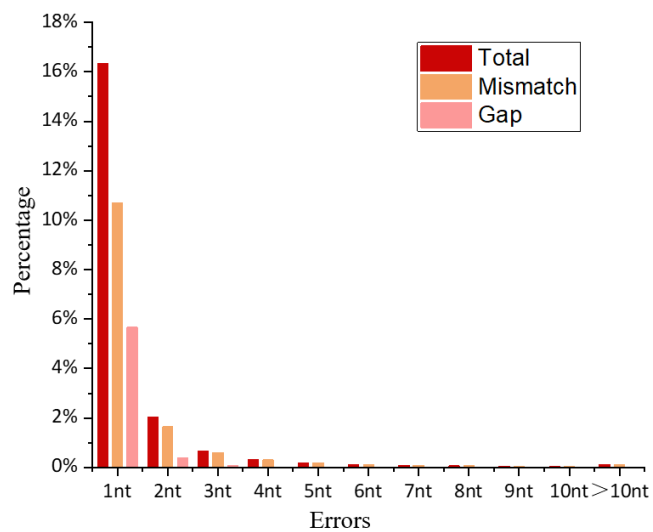

474

475

476 **Supplementary Figure 47**

477 The percentage of the reads with errors containing substitution and indel ranging from 1 to 10

478 nt and more than 10 nt among total reads respectively in PCR with 30 cycles.

479



480

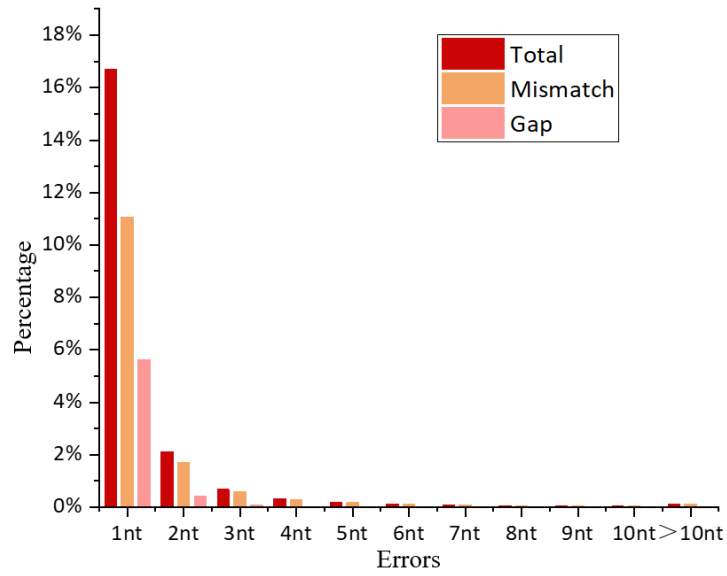

481

482

483 **Supplementary Figure 48**

484 The percentage of the reads with errors containing substitution and indel ranging from 1 to 10

485 nt and more than 10 nt among total reads respectively in PCR with 60 cycles.

486

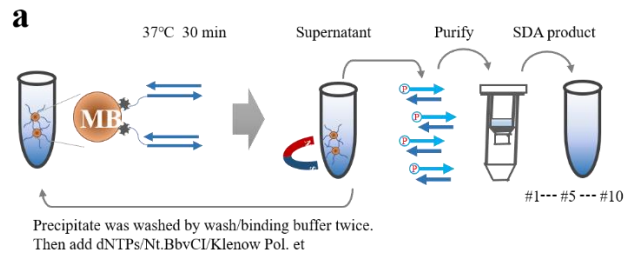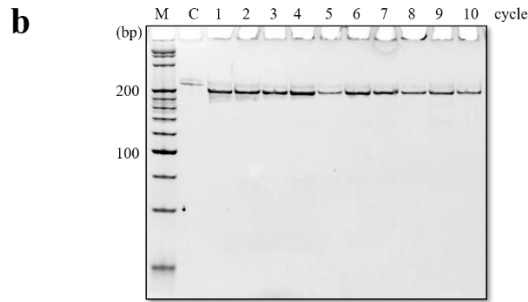

488

489

490 **Supplementary Figure 49**

491 Experimental procedures of repeated iDR-amplified the oligo (SDA28).

492 **(a)** Workflow of 10 consecutive amplification of iDR. **(b)** 10% native PAGE results of iDR

493 products. Lane M: 20bp DNA ladder; lane C: DNA template of iDR; lane 1: iDR #1; lane 2:

494 iDR #2; lane 3: iDR #3; lane 4: iDR #4; lane 5: iDR #5; lane 6: iDR #6; lane 7: iDR #7; lane

495 8: iDR #8; lane 9: iDR #9; lane 10: iDR #10.

496

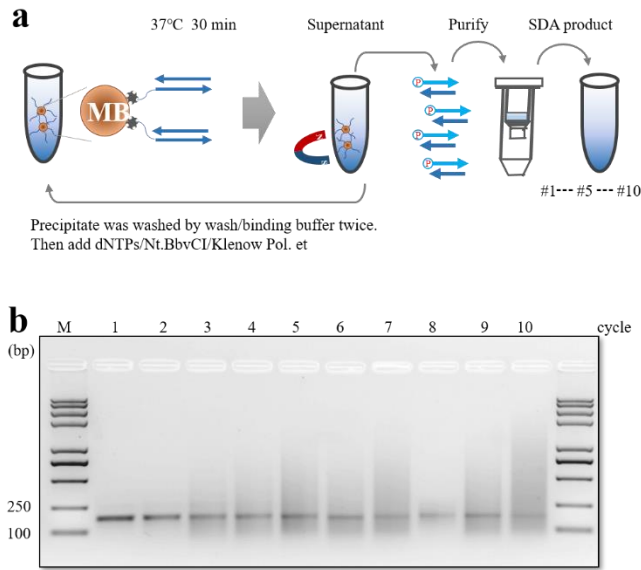

498

499

500 **Supplementary Figure 50**

501 Experimental procedures of repeated iDR-amplified the oligo pool (Pool 1, Twist Bioscience).

502 **(a)** Workflow of 10 consecutive amplification of iDR. **(b)** 2% agarose results of iDR products.

503 Lane M: Trans2K Plus II DNA Maker; lane 1: iDR #1; lane 2: iDR #2; lane 3: iDR #3; lane 4:

504 iDR #4; lane 5: iDR #5; lane 6: iDR #6; lane 7: iDR #7; lane 8: iDR #8; lane 9: iDR #9; lane 10:

505 iDR #10.

506

507

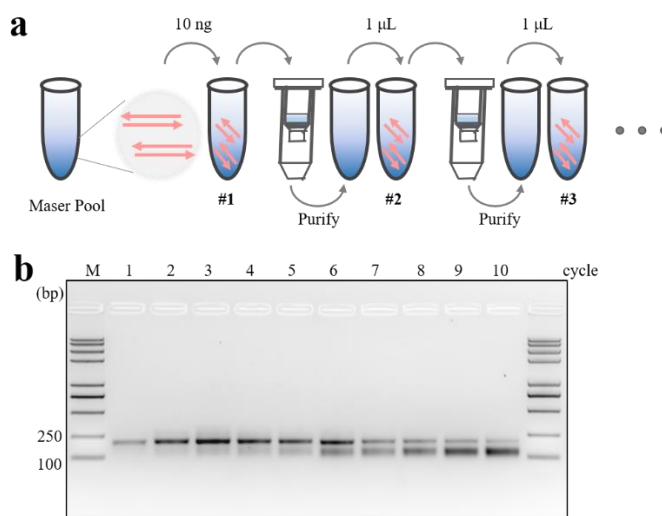

508  
509

510 **Supplementary Figure 51**

511 Experimental procedures of repeated PCR-amplified the oligo pool (Pool 1, Twist Bioscience).

512 **(a)** Workflow of 10 consecutive amplification of PCR. **(b)** 2% agarose results of PCR products.

513 Lane M: Trans2K Plus II DNA Maker; lane 1: PCR #1; lane 2: PCR #2; lane 3: PCR #3; lane  
514 4: PCR #4; lane 5: PCR #5; lane 6: PCR #6; lane 7: PCR #7; lane 8: PCR #8; lane 9: PCR #9;  
515 lane 10: PCR #10.

516

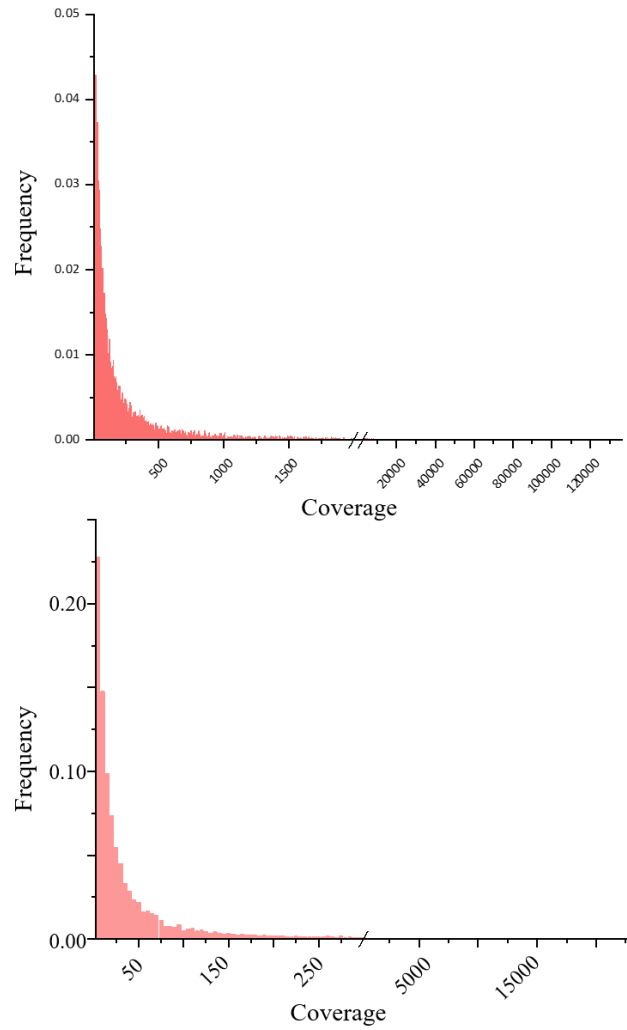

518

519

520 **Supplementary Figure 52**

521 The distribution of the number of reads per each given sequence of #5 PCR.

522 The distribution of the number of reads per each given sequence of total sequenced reads (the

523 upper portion) and per million sequenced reads (the lower part) of PCR-amplified the oligo

524 pool (Pool 1, Twist Bioscience).

525

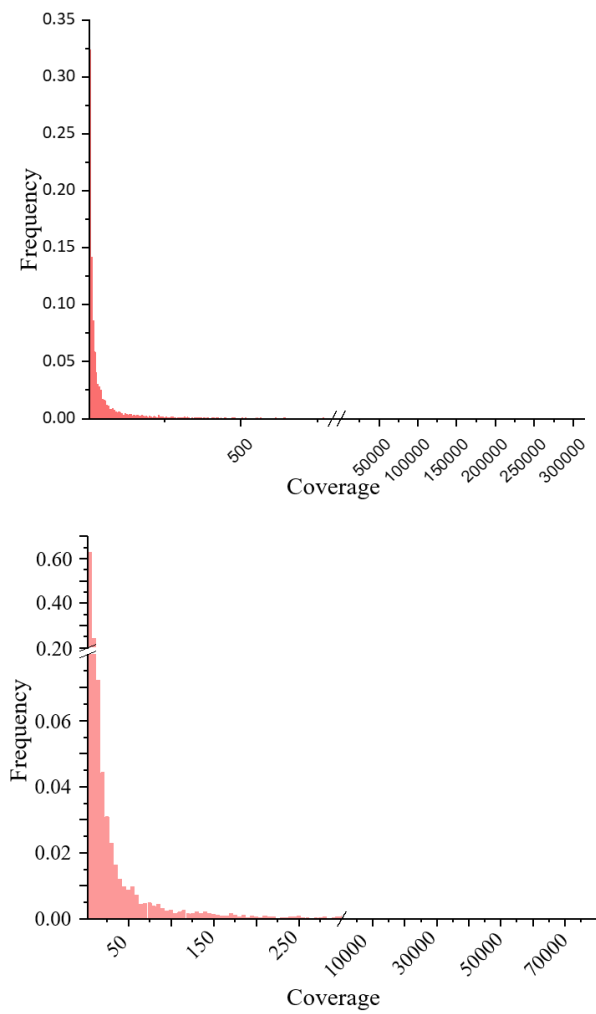

527

528

529 **Supplementary Figure 53**

530 The distribution of the number of reads per each given sequence of #10 PCR.

531 The distribution of the number of reads per each given sequence of total sequenced reads (the

532 upper portion) and per million sequenced reads (the lower part) of PCR-amplified the oligo

533 pool (Pool 1, Twist Bioscience).

534

535

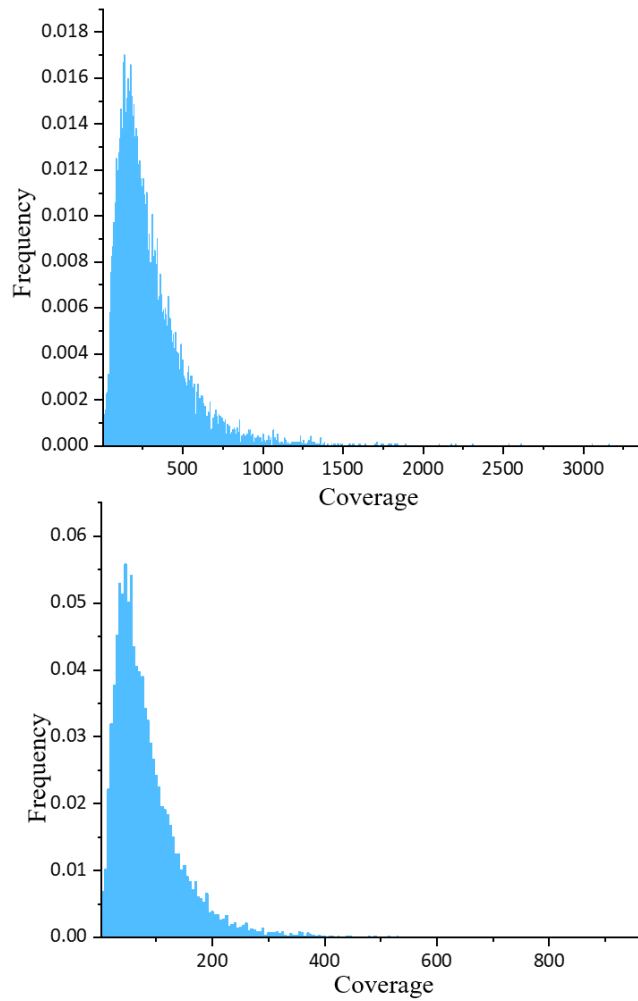

536

537

538 **Supplementary Figure 54**

539 The distribution of the number of reads per each given sequence of #5 iDR.

540 The distribution of the number of reads per each given sequence of total sequenced reads (the

541 upper portion) and per million sequenced reads (the lower part) of PCR-amplified the oligo

542 pool (Pool 1, Twist Bioscience).

543

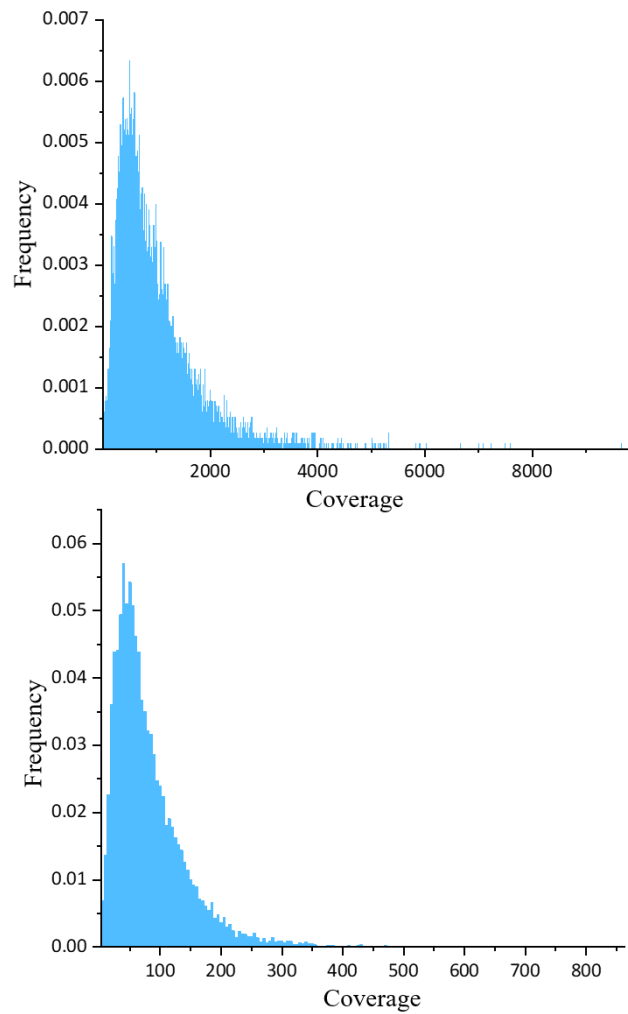

545

546

547 **Supplementary Figure 55**

548 The distribution of the number of reads per each given sequence of #10 iDR.

549 The distribution of the number of reads per each given sequence of total sequenced reads (the

550 upper portion) and per million sequenced reads (the lower part) of PCR-amplified the oligo

551 pool (Pool 1, Twist Bioscience).

552



553

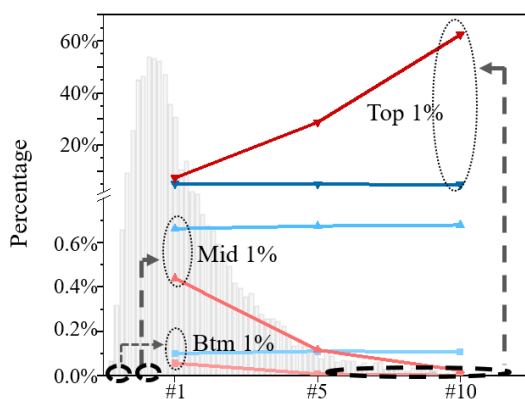

554

555

### 556 **Supplementary Figure 56**

557 The percentage of some certain sequences (1% of total number) with the bottom, middle and  
558 top coverage in PCR #1 and iDR #1 was investigated in ten serial PCR and iDR separately  
559 (Supplementary Note 9).

560 The frequency of 116 oligos (1% of the total number, dark red) with the top coverage rose to  
561 62.3% (#10 PCR), compared with 7.4% (#1 PCR). But, the frequency of 116 strands (1% of  
562 the total number) with the middle (Pink) and bottom (light pink) coverage was down to 0.011%  
563 and 0.0002% separately in #10 PCR. However, the frequency of 116 oligos whatever the  
564 coverage was had remained stable in iDR (blue-colored items).

565

566

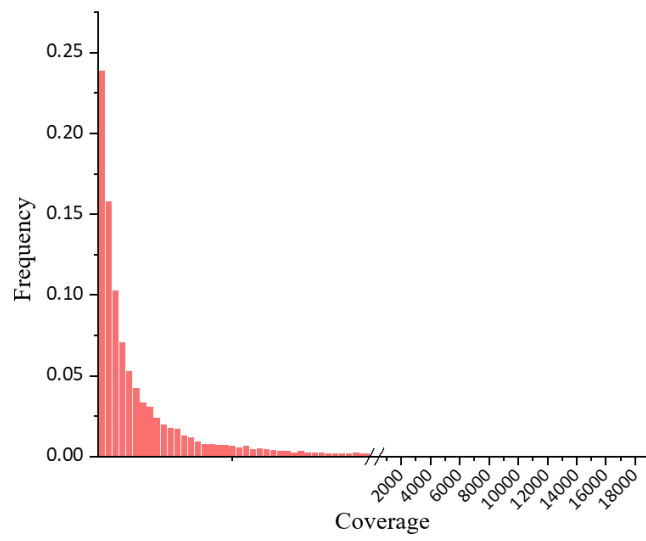

567

568

569 **Supplementary Figure 57**

570 The distribution of the number of M1G1 reads per each given sequence of #5 PCR amplified

571 the oligo pool (Pool 1, Twist Bioscience).

572

573

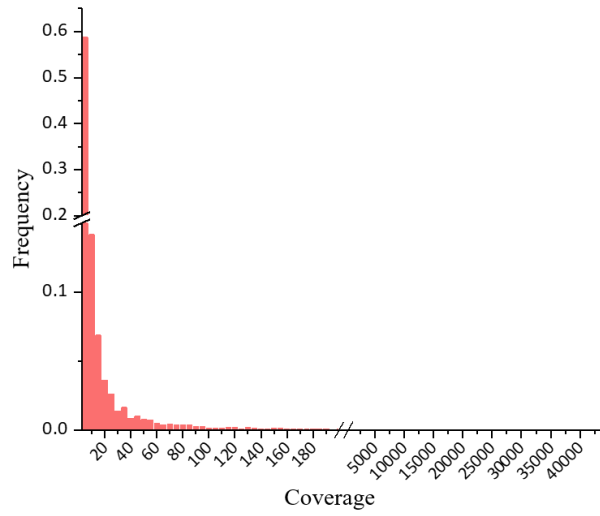

574

575

576 **Supplementary Figure 58**

577 The distribution of the number of M1G1 reads per each given sequence of #10 PCR amplified

578 the oligo pool (Pool 1, Twist Bioscience).

579

580

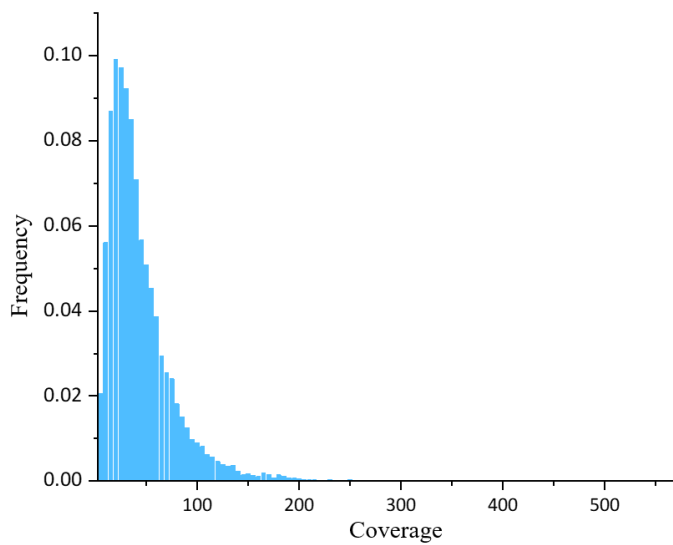

581

582

583 **Supplementary Figure 59**

584 The distribution of the number of M1G1 reads per each given sequence of #5 iDR amplified

585 the oligo pool (Pool 1, Twist Bioscience).

586

587

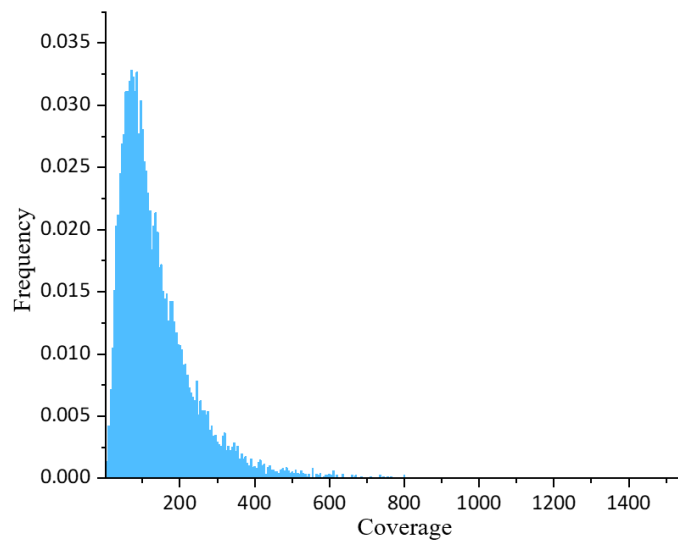

588

589

590 **Supplementary Figure 60**

591 The distribution of the number of M1G1 reads per each given sequence of #5 PCR amplified  
592 the oligo pool (Pool 1, Twist Bioscience).

593

594

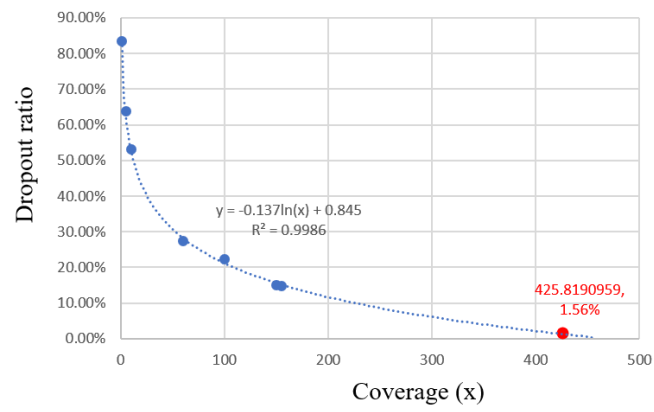

595

596

### 597 **Supplementary Figure 61**

598 The coverage – dropout ratio curve of #10 PCR.

599 The dropout ratio is 1.56%, the limit of our decoder, at an average coverage of 426 x (red dot).

600

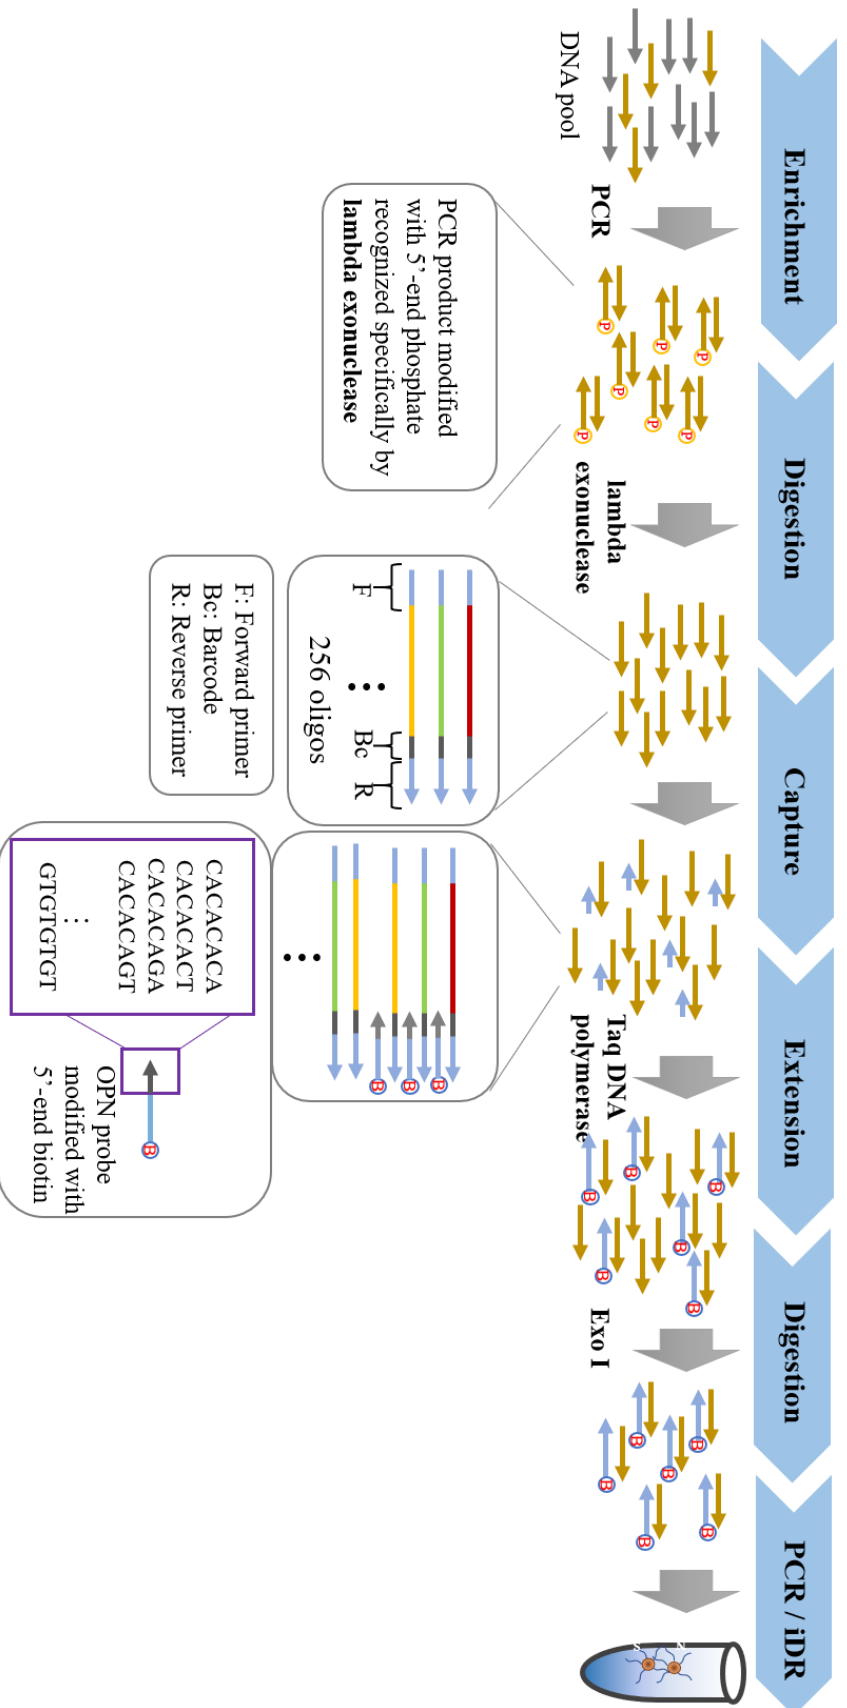

Figure S62

Workflow of single-stranded oligo pool amplification (SOA) and oligo pool normalizing (OPN).

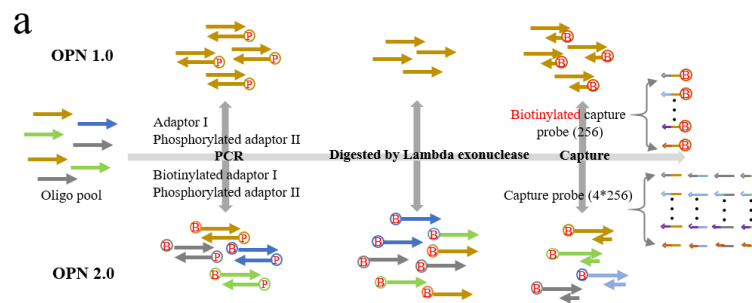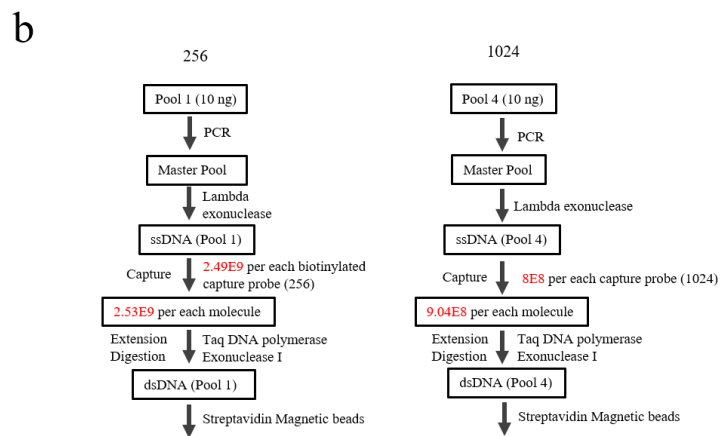

605  
606  
607

608 **Supplementary Figure 63**

609 A comparison of Oligo Pool Normalizing (OPN) 1.0 and 2.0 and the workflow of OPN 1.0 and  
610 2.0 in detail.

611 **(a)** Improved the process of oligo pool normalizing. **(b)** The workflow of OPN 1.0 and OPN  
612 2.0 containing some specific parameter in our experiments.

613  
614



615

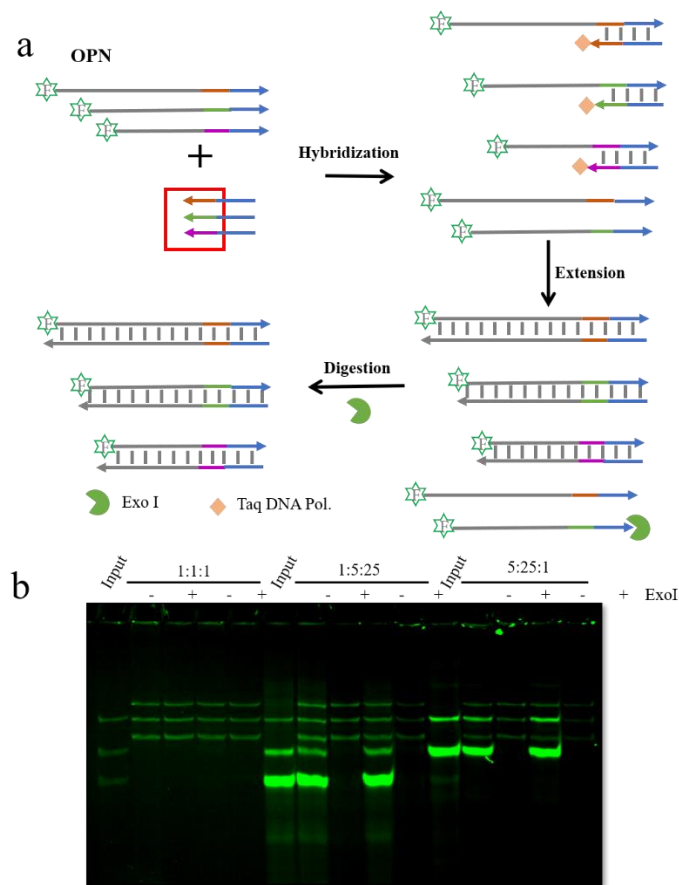

616

617

618 **Supplementary Figure 64**

619 Fluorescence PAGE to visualize the uniformity after the process of OPN through three oligos  
620 of different length bearing 3' FAM-label.

621 **(a)** Workflow of characterizing OPN probe using three FAM-labeled oligos of different lengths.

622 **(b)** 12% native PAGE results of OPN products. Input: the initial quantity of oligos.

623

624

625

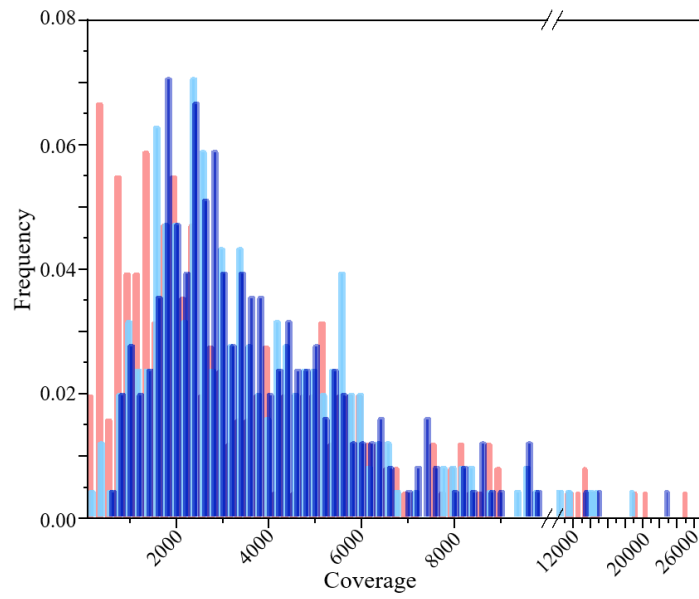

626

627

628 **Supplementary Figure 65**

629 The distribution of the number of reads per each given sequence per million sequenced reads

630 of PCR-amplified (red), iDR-amplified (cambridge blue) and OPN-iDR-amplified (dark blue)

631 the oligo pool (Pool 1-OPN), normalized to 1 million sequenced reads.

632

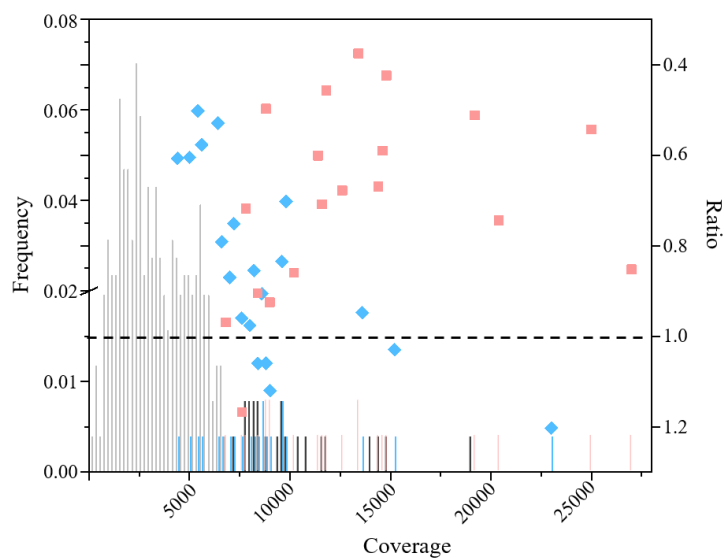

634

635

636 **Supplementary Figure 66**

637 The coverage ratio of the sequences with a large coverage before and after OPN.

638 The distribution of the number of reads per each given sequence per million sequenced reads

639 of iDR-amplified (gray) the oligo pool and 26 sequences with a large coverage of the given

640 sequences are labeled black. The distribution of the number of reads per each given 26

641 sequences per million sequenced reads of PCR-amplified (red) and OPN-iDR (blue) the oligo

642 pool (Pool 1- OPN). Blue diamond represents the coverage ratio of OPN-iDR to iDR; red

643 square represents the coverage ratio of OPN-iDR to PCR.

644

645

646

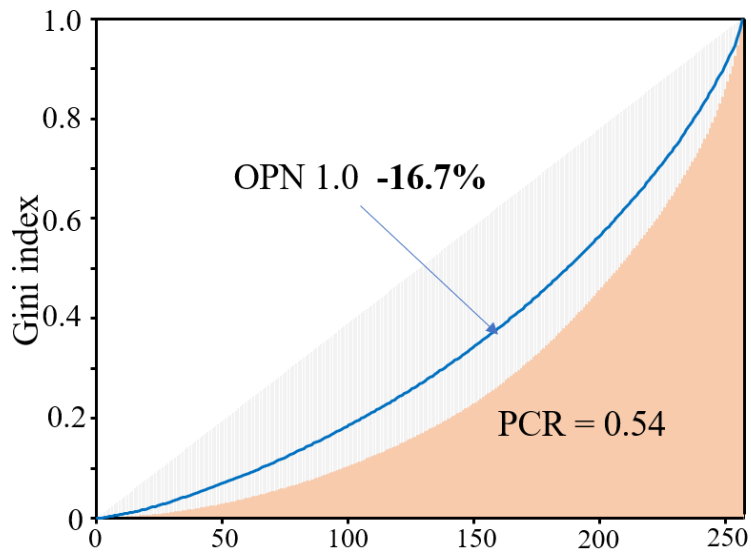

647  
648

649 **Supplementary Figure 67**

650 Lorenz curve showing the cumulative concentration distribution of the OPN-iDR products  
651 from grossly biased oligo pool.

652 From this figure, we determined that the OPN process reduces the Gini inequality coefficient  
653 from 0.54 to 0.45.

654

655

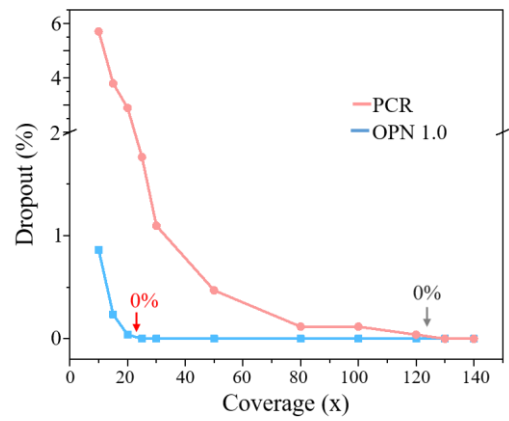

656

657

658 **Supplementary Figure 68**

659 Coverage depth of random sequenced reads was plotted to its dropout rate.

660 For 10x coverage depth, the dropout rate for PCR is 5.70% and 0.86% for OPN 1.0-iDR. The

661 dropout rate became 0 at coverage of about 20 (red arrow) for OPN 1.0 iDR and 120 (gray

662 arrow) for PCR.

663

664

665

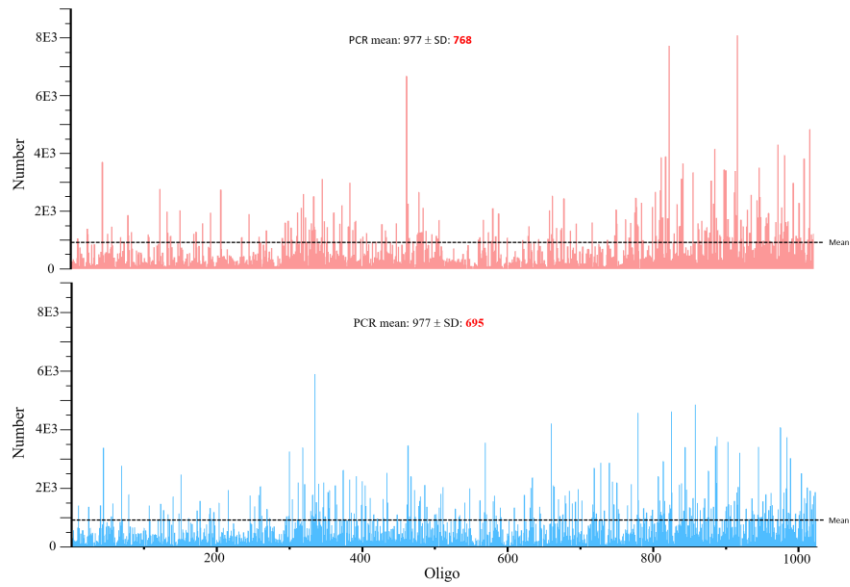

666

667

668 **Supplementary Figure 69**

669 The copy number per oligo before (red) and after (blue) OPN 2.0 per million the noisy reads.

670 The standard deviation of coverage which the sequenced oligo pool did not proceed the process

671 of OPN 2.0 was larger than that the sequenced oligo pool was carried out the process of OPN.

672

673

674

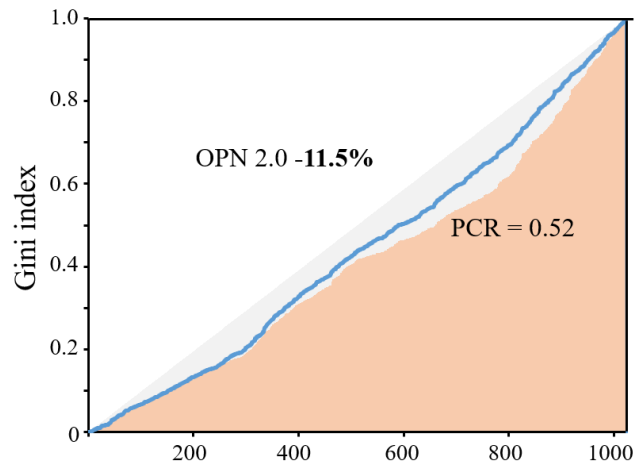

675

676

677 **Supplementary Figure 70**

678 Lorenz curve showing the cumulative concentration distribution of the OPN 2.0-iDR products

679 from grossly biased oligo pool (1024).

680 From this figure, we determined that the OPN process reduces the Gini inequality coefficient

681 from 0.52 to 0.46.

682

683

684

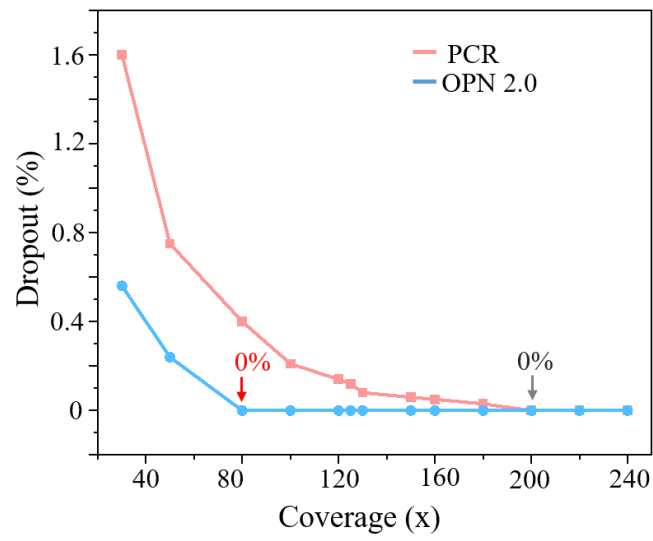

685

686

687 **Supplementary Figure 71**

688 Coverage depth of random sequenced reads was plotted to its dropout rate.

689 The dropout rate became 0 at coverage of about 80 (red arrow) for OPN 1.0 iDR and 200 (gray

690 arrow) for PCR.

691

692



693

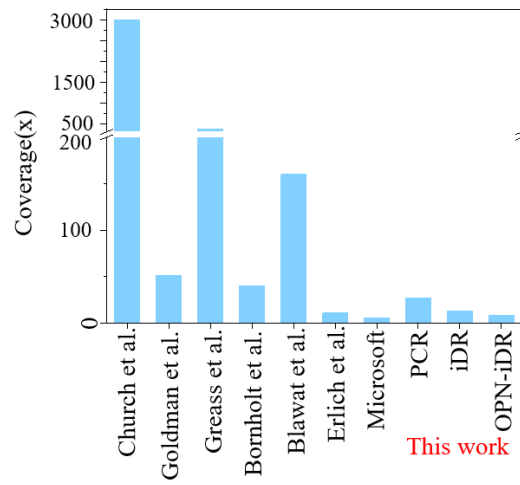

694

695

696 **Supplementary Figure 72**

697 Minimum coverages for decoding compared with prior work.

698

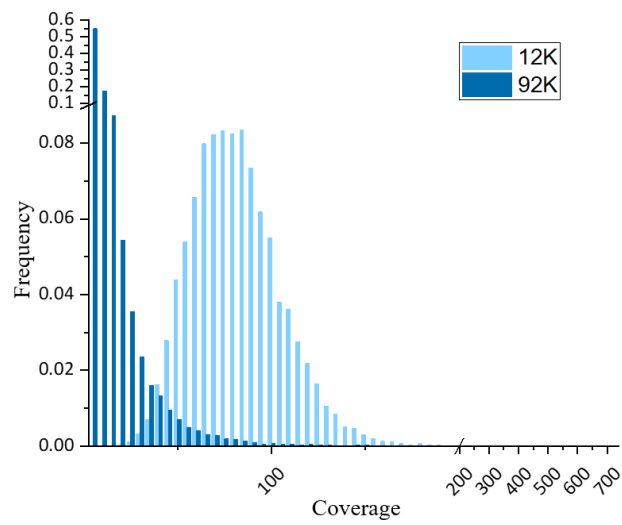

700

701

702 **Supplementary Figure 73**

703 The distribution of the number of reads per each given sequence per million sequenced reads

704 of iDR-amplified the oligo pool (Pool 2, Twist Bioscience, light blue) and oligo pool (Pool 3,

705 CustomArray, dark blue).

706

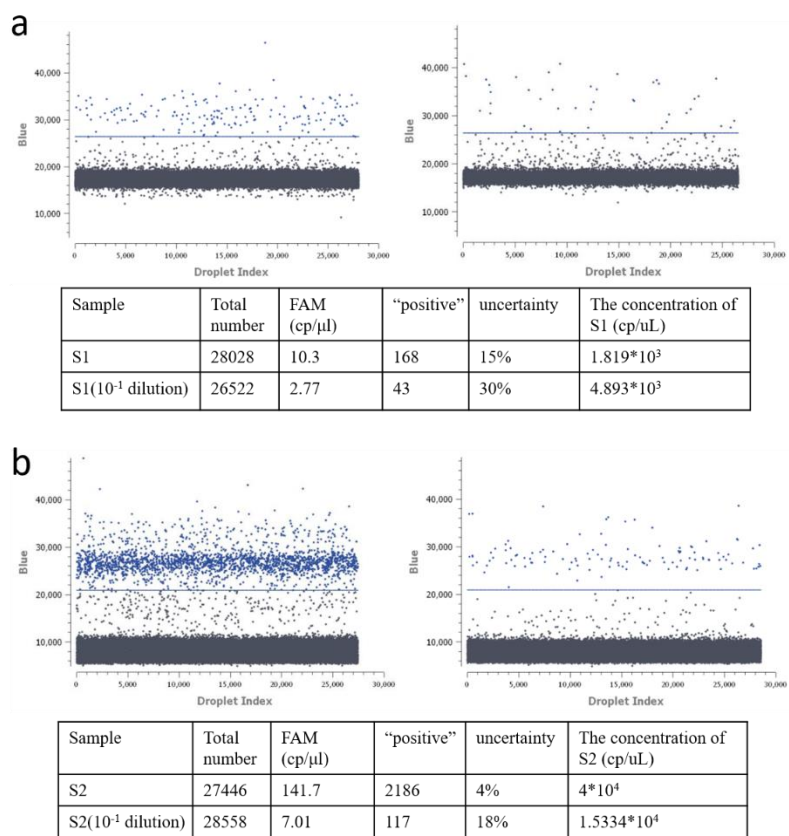

708

709

710 **Supplementary Figure 74**

711 The number of molecules determined by digital PCR.

712 **(a).** The result of oligo pool (Pool 3, CustomArray, 170 nt). Sample without dilution on the left;713 Sample with being diluted 10-folds on the right. **(b).** The result of oligo pool (Pool 1, Twist

714 Bioscience, 180 nt) in the bottom part. Sample without dilution on the left; Sample with being

715 diluted 10-folds on the right. The average copy number of oligo pool 3 is an order of magnitude

716 less than that in oligo pool 1 when the mass of DNA of both oligo pool was 7 ng. The results

717 indicated that the quality of oligo pool from different synthesis platform is different.

718

719

720

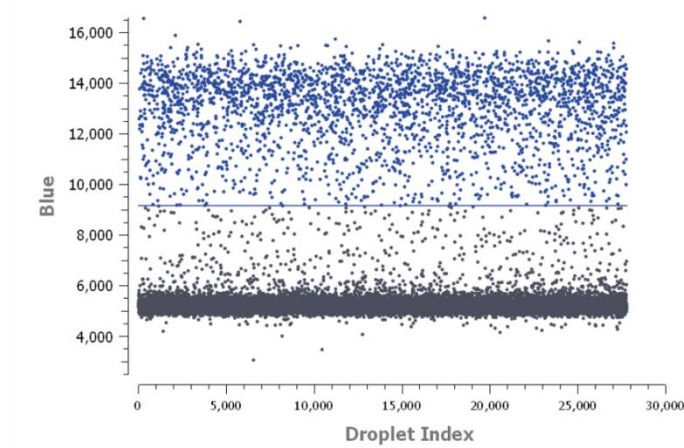

| Sample                        | Total number | FAM (cp/μl) | “positive” | uncertainty | The concentration of S1 (cp/uL) |
|-------------------------------|--------------|-------------|------------|-------------|---------------------------------|
| S1(dilution 10 <sup>3</sup> ) | 27772        | 180.6       | 2788       | 4%%         | 2.26*10 <sup>6</sup>            |

721

722

723 **Supplementary Figure 75**

724 The number of molecules of oligo pool (1024) determined by digital PCR.

725 The result of oligo pool (Pool 4, CustomArray). Sample with being diluted 10<sup>3</sup>-folds. The

726 average copy number of oligo pool 4 is 2.26\*10<sup>6</sup> when the mass of DNA of both oligo pool

727 was 7 ng.

728

729

730

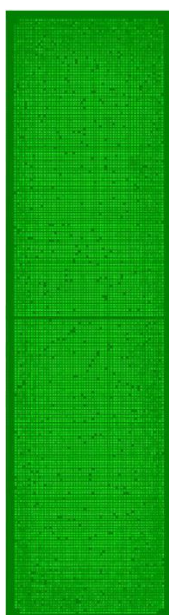

731

732

733 **Supplementary Figure 76**

734 The image of quality control of oligo pool 4 (1024).

735

736

| D.Y. Zhang et al.*            |            | Ours                         |            |
|-------------------------------|------------|------------------------------|------------|
| Component                     | Cost       | Component                    | Cost       |
| Capture probe (256 sequences) | \$5,026.60 | Capture probe (OPN 1.0)      | \$5,026.60 |
|                               |            | Capture probe (OPN 2.0)      | \$1,290.97 |
| Oligo pool (256 precursors)   | \$3,041.93 | Oligo pool (12K)             | \$1,956.27 |
| USER Enzyme (2U)              | \$3.23     | Lambda exonuclease (7.5U)    | \$0.58     |
|                               |            | Exonuclease I (5U)           | \$0.13     |
| Total cost                    | \$8,071.76 | Total cost (OPN 1.0)         | \$6,983.58 |
|                               |            | Total cost (OPN 2.0)         | \$3,247.95 |
| Total base                    | 17,920 nt  | Total base (OPN 1.0)         | 46,080 nt  |
|                               |            | Total base (OPN 2.0)         | 153,600 nt |
| Cost per each base            | \$0.450    | Cost per each base (OPN 1.0) | \$0.152    |
|                               |            | Cost per each base (OPN 2.0) | \$0.021    |

737

738

739 **Supplementary Figure 77**

740 The cost of oligo pool normalizing using OPN 1.0 and OPN 2.0 is inexpensive, compared to

741 SNOP<sup>1</sup>.

742

743

744 **Supplementary Table 1. Sequences were avoided in the process of encoding.**

745

| Serial number | Sequences   |
|---------------|-------------|
| 1             | GCTCTTC     |
| 2             | GAAGAGC     |
| 3             | GCTGAGG     |
| 4             | CCTCAGC     |
| 5             | CCTAAGC     |
| 6             | GCTTAGG     |
| 7             | CCTTAGC     |
| 8             | GCTAAGG     |
| 9             | CCTGAGC     |
| 10            | GCTCAGG     |
| 11            | CCTCAGT     |
| 12            | ACTGAGG     |
| 13            | CCTCAGG     |
| 14            | GCGGCCGC    |
| 15            | CTTAAAGCGCT |
| 16            | AGATAG      |
| 17            | TGTTGG      |
| 18            | GAGCTG      |
| 19            | AGTCTG      |

746

747

748 **Supplementary Table 2. Primer sequences used.**

749

| Name           | Sequence (5'→3')                                                                                                                                                                                                                              | For oligo pool |
|----------------|-----------------------------------------------------------------------------------------------------------------------------------------------------------------------------------------------------------------------------------------------|----------------|
| Forward primer | <i>GTCCCGCTCATGCATCACCTACCTCAGCTCAACTCACT</i>                                                                                                                                                                                                 | Pool 1         |
| Adaptor 2      | TCCACGACGATCAGACT                                                                                                                                                                                                                             |                |
| Adaptor 2-1    | Biotin-AAAAATCCACGACGATCAGACT                                                                                                                                                                                                                 |                |
| Adaptor 2      | AGCGCTTTAAGCCAACA                                                                                                                                                                                                                             | Pool 1-OPN     |
| Adaptor 2-1    | Biotin-AAAAAAGCGCTTTAAGCCAACA                                                                                                                                                                                                                 |                |
| Adaptor 2-2    | Phosphate-AGCGCTTTAAGCCAACA                                                                                                                                                                                                                   |                |
| Adaptor 1      | <i>C*T*A*CTCCACTCGTCTATCT</i>                                                                                                                                                                                                                 | Ligation       |
| probe          | FAM-AGATCAATTAATACGATACCTGCGTTT                                                                                                                                                                                                               |                |
| splint         | CTCGGAAGAGCTGAAAACGCAGGTATCG                                                                                                                                                                                                                  |                |
| T1             | GTCGCTAACAGAGTAACCTCCTCAGCTCTTCCGAGTCGGC<br>AGCACTGCATAATTCTCTTACTGTCATGCCATCCGTAAGAT<br>GCTTTCTGTGACTGGTGAGTACTCAACCAAGTCATTCTGAG<br>AATAGTGTATGCGGCGACCGAGTTGCTCTTGCCCGGCGTC<br>AATACGGGATAATACCGCGCCACATAGCAGAACTTATGAG<br>TGGAGGTGTAAAGTG |                |
| Forward primer | <i>TGCATCACCTACCTCAGC</i>                                                                                                                                                                                                                     | Pool 2         |
| Adaptor 2      | TCCACGACGATCAGACT                                                                                                                                                                                                                             |                |
| Adaptor 2-1    | Biotin-AAAAATCCACGACGATCAGACT                                                                                                                                                                                                                 |                |
| Forward primer | <i>GTGCCTTCTCCTCAGC</i>                                                                                                                                                                                                                       | Pool 3         |
| Adaptor 2      | AGCGCTTTAAGCCAACA                                                                                                                                                                                                                             |                |
| Adaptor 2-1    | Biotin-AAAAAAGCGCTTTAAGCCAACA                                                                                                                                                                                                                 |                |
| Forward primer | Biotin-AAAAACACTTTACACCTCCACTCAT                                                                                                                                                                                                              | Pool 4         |
| Adaptor 2-1    | Phosphate-TCACCATCCACTCTAAACAC                                                                                                                                                                                                                |                |
| Adaptor 2-2    | Phosphate-CTTCCGACCACTATACTCT                                                                                                                                                                                                                 |                |
| Adaptor 2-3    | Phosphate-ACTCCACTCACCTATATCC                                                                                                                                                                                                                 |                |
| Adaptor 2-4    | Phosphate-CTACTCCACTACTACCACA                                                                                                                                                                                                                 |                |

750

751 Note: Forward primer were comprised of Adaptor I marked with italic and recognition

752 sequences of nickase marked with bold fonts. Adaptor 1-1 was phosphorothioate modified,

753 marked with '\*', to prevent 5'-exonucleolytic degradation by Lambda exonuclease.

754

755



## SUPPLEMENTARY INFORMATION

756

### 757 **Supplementary Note 1. BASIC code strategies.**

758 **Distributed Storage Systems in application to DNA storage.** DNA coding is a new type of  
759 distributed storage system. In a distributed storage system, data redundancy is the most basic  
760 strategy for ensuring system reliability and improving data availability. By storing multiple  
761 instances of the same data file with different nodes to ensure data availability, even some of the  
762 data is unavailable, the remaining nodes can still reconstruct the original data. Redundancy  
763 strategies must consider two points: firstly, how to create redundant data, and secondly, how to  
764 reconstruct data when some nodes fail. Currently, widely used redundancy strategies are  
765 replication and erasure coding. Replication distributes multiple copies of a file to different  
766 nodes in the system. As long as one of these copies is valid, the whole file can be obtained.  
767 This method has high reading and writing efficiency, but it has low storage utilization and is  
768 not suitable for DNA coding. Erasure Coding is another important redundancy strategy.  $(N, K)$   
769 erasure code matrix divides an original file of size  $M$  into  $K$  blocks, each block with size of  
770  $M/K$ ; then the  $K$  block files are encoded into  $N$  code blocks and distributed to  $N$  nodes. The  
771 original file can be reconstructed from any  $K$  code blocks in the  $N$  code blocks. Erasure coding  
772 requires less storage than replication, whereas the calculation is relatively complex. BASIC  
773 code is a kind of distributed erasure code designed for DNA coding, aiming at maximizing  
774 storage utilization and effectively guaranteeing the reliability of the storage system.

775 This section briefly introduces the binary cyclic code. Let  $p$  be a prime number greater  
776 than  $N$  and the ring  $R_p$  is defined as  $R_p := \mathbb{F}_2[z]/(1 + z^p)$ , where the element  $\sum_{i=0}^{p-1} a_i z^i$   
777 in  $R_p$  is called polynomial, and the vector  $(a_0, a_1, \dots, a_{p-1}) \in \mathbb{F}_2^p$  is a codeword of

778 polynomial  $\sum_{i=0}^{p-1} a_i z^i$ . A binary cyclic code of length  $p$  is a subset of additions and  $z$ -multiplier  
779 closures defined in  $R_p$ , where addition is an XOR operation and  $z$  multiplication is a cyclic  
780 right shift operation.

781 In this paper, we consider the parity code  $C_p$ , which represents the set of polynomials for  
782 which all non-zero coefficient entries in  $R_p$  are even.  $C_p$  is formalized as:

$$\begin{aligned}
783 \quad C_p &:= \left\{ \sum_{i=0}^{p-1} a_i z^i \in R_p \mid a_0 + a_1 + \dots + a_{p-1} = 0 \right\} \\
784 \quad &= \{a(z) \in R_p \mid a(z) \equiv 0 \text{ mod } (1+z)\} \\
785 \quad &= \{a(z)(1+z) \mid a(z) \in R_p\}
\end{aligned}$$

786 The coefficient of the highest term of the element  $a(z)$  in  $C_p$  is the sum of the former  $m-1$   
787 coefficients, i.e.,  $a_{p-1} = \sum_{i=0}^{p-2} a_i$ . It can be verified that  $C_p$  satisfies the addition and  $z$   
788 multiplication closure. Because the operations in the domain  $C_p$  are only XOR and the right-  
789 shifted loop, it can be well applied to design the encoding system.

790 The addition defined in  $C_p$  is an XOR operation, which will not be described in detail here.  
791 The  $z$ -multiplication operation in  $C_p$  is defined as  $z_p: R_p \times C_p \rightarrow C_p$ .  $z_p(2^i, c) = 2^i *  
792 c \text{ mod } (2^p + 1)$ , that is, the loop shifts right by  $i$  bits. For example, the codeword is  
793  $z_3(2^1, 101) = 011$ ;  $z_3(2^1 + 2^0, 101) = z_3(2^1, 101) + z_3(2^0, 101) = 011 + 101 = 110$ .

794 Vandermonde matrix is  $V = [v_{i,j}]_{n \times k}$ , where  $v_{i,j} = \alpha_j^{i-1}$ . The determinant of an  $N$ -order  
795 Vandermonde square matrix can be represented as  $\det(V) = \prod_{1 \leq i < j \leq n} (\alpha_j - \alpha_i)$ . When  $\alpha_i$   
796 are not the same,  $\det(V)$  is not zero. The Vandermonde matrix has many interesting features.  
797 The most important thing here is that the sub-polynomials formed by any row and column are  
798 invertible. The Vandermonde matrix and its transformation matrix ensure that the encoding

799 data can be decoded. For convenience, note that  $v_i = (v_{i,1}, v_{i,2}, \dots, v_{i,n}) =$   
800  $(\alpha_1^{i-1}, \alpha_2^{i-1}, \dots, \alpha_n^{i-1})$  is the  $i$ th row vector of  $V$ .

801 **Constraints in encoding DNA digital information.** GC content was restricted in the range  
802 between 45% and 55%. Meanwhile, long homopolymers (i.e., AAAA, TTTT, GGGG, CCCC)  
803 were dropped. More than 6-bp self-sequence complementarity and 10bp inter-sequence  
804 complementarity were avoided. Certain sequences were circumvented (Supplementary Table  
805 1).

806 **The distributed storage system coding strategy.** The goal was to transform the input file to  
807 DNA sequence reads with biochemical constraints. DNA basic code should enable error-  
808 detection, error-correction and full recovery. There were two key steps: (a) erasure coding, (b)  
809 RS coding. Since the sequence reads needed to satisfy the biochemical constraints, both  
810 processes included the step of filtering the sequences.

811 **Erasure coding.** The algorithm divided the file into non-overlapping groups of length  $K \cdot L$   
812 bits, each group containing  $K$  binary data of length  $L$ . In the subsequent encoding step, the  
813 algorithm processed the data in groups.  $K$  and  $L$  were arbitrarily defined. Here we used  $K=252$ ,  
814  $L=256$  bits (32 bytes) because this parameter setting was compatible with the standard  
815 computing environment and was within the capabilities of actual manufacturing. The BASIC  
816 encoding was shown as follows.

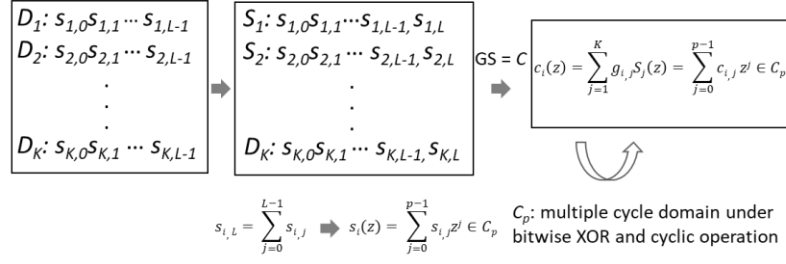

817

818 For each group, we proposed BASIC code to encode the K pieces of data one by one. The

819 BASIC code used codeword as the encoding and decoding unit, a codeword was a binary data

820 of L bits. K codewords of length L were encoded into N codewords by polynomial matrix

821 operations on the polynomial cycle domain  $C_p$ , where  $N > K$ ,  $N - K$  was the maximum number

822 of error sequences per group. Actually, N was 256, which meant each group of data allowed a

823 maximum of 4 reads to be lost or corrupted. For simplicity of discussion, a codeword is

824 represented as  $D_i$  or  $C_i$ . The input data was regarded as a vector  $D = (D_1, D_2, \dots, D_K)$ , and

825 the encoded data was a vector  $C = (C_1, C_2, \dots, C_N)$ . The generation matrix G is a matrix defined

826 on  $R_p$ , which was an improvement of the Vandermonde matrix. The reason for using the

827 Vandermonde matrix was that the BASIC data recovery algorithm required the encoding matrix

828 to be reversible by any  $n \times n$  submatrix. The specific process was as follows:

829 1) In order to ensure that the obtained  $s_i(z)$  was in  $C_p$ , for a set of  $K \times L$  data  $D =$

830  $(D_1, D_2, \dots, D_K)$ , first added a parity bit at the end of each sequence read. The parity bit was

831 calculated as  $s_{i,p-1} = \sum_{j=0}^{p-2} s_{i,j}$  (where the addition is an exclusive-OR operation). After

832 that, the codeword was  $S = (S_1, S_2, \dots, S_K)$ . And p was 257 here.

833 2) Initialize the generation matrix G as follows:

$$834 \quad \mathbf{G} = \begin{bmatrix} 2^0 & 2^1 & \dots & 2^{K-1} \\ 2^{0 \times 2} & 2^{1 \times 2} & \dots & 2^{(K-1) \times 2} \\ \vdots & \vdots & \ddots & \vdots \\ 2^{0 \times N} & 2^{1 \times N} & \dots & 2^{(K-1) \times N} \end{bmatrix} \text{mod } (2^p + 1) = [g_{i,j} = 2^{(j-1) \times i \text{ mod } p}]_{N \times K}$$

835 First, a constant S was added to all codewords, because zero-by-zero multiplication was  
 836 still zero, which could cause the algorithm to not terminate. Next, initialized  $C_i$ , got  $C_i \leftarrow$   
 837  $g_i S^T, g_i = (g_{i,1}, g_{i,2}, \dots, g_{i,K})$  was the i-th row of G. Finally, for any  $C_i$ , the last parity bit was  
 838 removed and its first L bits were saved.

839 **RS Encoding.** In order to ensure the accuracy of data storage in DNA, RS codes were used to  
 840 increase error correction and repair capabilities. Here, for each sequence reads, 2 bytes were  
 841 allocated for the RS codes, which could detect errors within 2 bytes and correct errors within  
 842 1 byte.

843 **Filtering.** Each codeword  $C_i$  consisted of three parts: the sequence number of the group, the  
 844 sequence number within the group, and the number of adjustments to  $G_i$ . The index part was  
 845 allocated a total of 4 bytes, in which the first 8 bits represented the group address, the middle  
 846 8 bits represented the address within each group, and the last 16 bits represented the number of  
 847 adjustments of  $G_i$ .

848 All sequence reads must meet the biochemical constraints, which meant that the sequence  
 849 could not contain any avoidance sequences. For the sequences obtained after the erasure coding,  
 850 we generated a number of random equal length sequences, so that the encoding sequences  
 851 didn't contain any avoidance sequence after exclusive-OR operation with one of the random  
 852 sequences. It could be proved by experiments that the upper 8 bits of the 16 bits, which  
 853 represent the number of adjustments of  $G_i$ , were always 0. Thus, we used these bits to store

854 the sequence number of the random sequence that was XORed for each encoding sequence.  
855 When decoding, it was only necessary to find a random sequence according to the serial number  
856 for XOR. The same process was performed for the individual RS codes. A number of random  
857 sequences with the same length of the RS code were generated for XOR operation. Since there  
858 were no bits to store the sequence number of the RS XOR sequence, we built a mapping table  
859 to store the RS code and its corresponding sequence number. It should be noted that all RS  
860 codes in the mapping table were unique.

861 **Decoding.** The decoding process was reversed step by step according to the encoding process.  
862 XOR operation was performed according to the mapping table to restore the RS code, and then  
863 the RS code was used for error correction to ensure that each sequence was accurate. Restore  
864 the BASIC code sequence. For each group of data, it was decoded according to the BASIC  
865 decoding algorithm.

866 1) Find K lossless sequences for each group. A parity bit is added for each codeword,  
867 which is denoted as  $C' = (C'_1, C'_2, \dots, C'_K)$ .

868 2) Construct a generation matrix G' according to the intragroup address and the  
869 number of adjustments of  $G_i$ . Calculate G's inverse matrix  $G'^{-1} = [f_{i,j}]_{K \times K}$ .

870 3) Decode  $D'_i = \sum_{j=1}^k f_{i,j} * C'_j$  according to the matrix  $G'^{-1}$ . Remove the last  
871 parity bit and finally recover the original data.

872 The decoding processes are shown as follows.

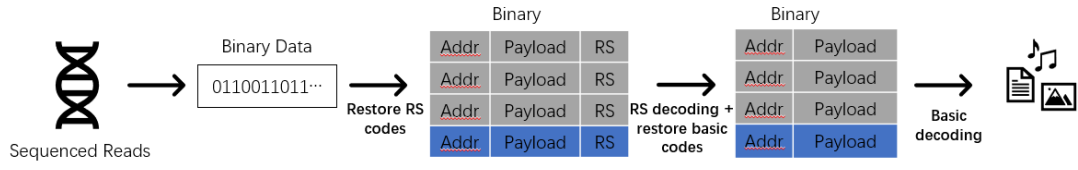

873

874

875

876 **Supplementary Note 2. Genome sequence were converted to binary information.**

877 Human mitochondrial genome containing Chinese (16,570 bp), Italy (16,569 bp), Native  
878 American (16,570 bp), and South African (16,567 bp) were converted to binary data by a  
879 simple rule (Supplementary Fig. 4). Genome information comes from mtDB – Human  
880 Mitochondrial Genome Database (<http://www.mtodb.igp.uu.se/sequences.php>). And then the  
881 binary file was encoded to 12K oligo pool (Twist Bioscience).

882 The 1.08-Mbp *M. mycoides* JCVI-syn1.0 genome sequence (accession CP002027) were  
883 also converted and encoded to 92K oligo pool (CustomArray) (Supplementary Figs. 4, 9).

884



885 **Supplementary Note 3. Sequencing on an Illumina Hiseq 4000 platform.**

886 **Sample collection and preparation.** DNA degradation and contamination were monitored on  
887 2% agarose gels. DNA purity was checked using the NanoPhotometer spectrophotometer  
888 (IMPLEN, CA, USA). DNA concentration was measured using Qubit DNA Assay Kit in Qubit  
889 2.0 Fluorometer (Life Technologies, CA, USA).

890 **Library preparation for sequencing.** A total amount of 700ng DNA per sample was used as  
891 input material for the DNA sample preparations. Sequencing libraries were generated using  
892 NEB Next® Ultra DNA Library Prep Kit for Illumina® (NEB, USA) following manufacturer's  
893 recommendations and index codes were added to attribute sequences to each sample. Briefly,  
894 the Chip DNA was purified using AMPure XP system (Beckman Coulter, Beverly, USA). After  
895 adenylation of 3' ends of DNA fragments, the NEB Next Adaptor with hairpin loop structure  
896 were ligated to prepare for hybridization. Then electrophoresis was used to select DNA  
897 fragments specified in length. 3 µL USER Enzyme (NEB, USA) was used with size-selected,  
898 adaptor-ligated DNA at 37°C for 15 min. At last, the products were purified (AMPure XP  
899 system) and library quality was assessed on the Agilent Bioanalyzer 2100 system.

900 **Clustering and sequencing.** The clustering of the index-coded samples was performed on a  
901 cBot Cluster Generation System using HiSeq 4000 PE Cluster Kit (Illumina) according to the  
902 manufacturer's instructions. After cluster generation, the library preparations were sequenced  
903 on an Illumina Hiseq 4000 platform and 150bp paired-end reads were generated.

904

905

906 **Supplementary Note 4. Optimizing the reaction conditions for iDR.**

907 To obtain the highest yield of iDR product, we investigated the effects of several factors  
908 including the combination of nickase and polymerase with strand displacement activity,  
909 nickase to polymerase ratio, reaction buffer, and additives et. al on iDR.

910 **Effects of combination of nickase and polymerase with strand displacement activity**

911 **on iDR.** We chose these nickases (e.g. Nt.BstNBI, Nt.BspQI, and Nt.BbvCI) of which the  
912 length of recognition sequences is more than 5 nt for encoding in convenience (Supplementary  
913 Fig. 10). Meanwhile, we used the polymerases with strand displacement activity such as Bst  
914 2.0 WarmStart DNA polymerase (Bst), Vent DNA polymerase (Vent), Bsu DNA polymerase  
915 (Bsu), Klenow fragment (3'→5' exo-, KF) and Phi29 DNA polymerase (Phi29)  
916 (Supplementary Fig. 11). Due to the different optimal temperature of nickases and polymerases,  
917 we chose the combination of Nt.BspQI and Bst/Vent which can be carried out at 55°C  
918 (Supplementary Fig. 12). And when performed at 37°C, the Nt.BspQI and Bsu/KF, Nt.BbvCI  
919 and Bsu/KF were combined (Supplementary Fig. 13). In addition, we applied Nt.BbvCI and  
920 Phi29 to the iDR. iDR product was not observed on Native PAGE gel (Supplementary Fig. 14).  
921 From the Native PAGE gels results and taking into account the reaction temperature, we  
922 adopted the combination of Nt.BspQI and Bsu DNA polymerase/Klenow fragment (3'→5'  
923 exo-), Nt.BbvCI and Klenow fragment (3'→5' exo-) in subsequent iDR.

924 **Effects of the concentration ratio of nickase and polymerase on iDR.** We assessed the  
925 iDR product in the condition of different concentration ratio of nickase and polymerase  
926 (Supplementary Figs. 15-17). Each reaction was carried out in 25 µL total volume. All reaction

927 components but the nickase and polymerase were assembled. Then nickase and polymerase  
928 were added to the tube respectively based on the concentration ratio designed. The reaction  
929 was then incubated at 37°C for 30 min. The enzyme in iDR were inactive by heating 80°C for  
930 20 min when the DNA template for iDR were not attached to streptavidin magnetic beads.  
931 While the DNA template for iDR were attached to streptavidin magnetic beads, the supernatant  
932 mixture was removed and the proteinase was added into the mixture, then incubated at 50°C  
933 for 30 min to inactive the nickase and polymerase.

934 The results showed that the yield of iDR product was increased with increasing amount  
935 of Nt.BspQI while the by-product was also increased. But the iDR product were slightly  
936 decreased as Bsu DNA polymerase was increased. We considered that the optimal  
937 concentration of Nt.BspQI and Bsu DNA Polymerase, Large Fragment were 0.5U/μL and  
938 0.25U/μL separately. Although the by-product occurred, the product of iDR was largely  
939 increased (Supplementary Fig. 15). Besides, the yield of iDR product was slightly increased  
940 with increasing amount of Nt.BspQI. But the iDR product were unchanged as Bsu DNA  
941 polymerase was increased. We considered that the optimal concentration of Nt.BspQI and  
942 Klenow Fragment (3'→5' exo-) are 0.25 U/μL and 0.25 U/μL separately (Supplementary Fig.  
943 16). The highest yield product of iDR was observed at 0.08 U/μL Nt.BbvCI and 0.16 U/μL  
944 Klenow fragment (3'→5' exo-). The concentration of Nt.BbvCI and KF was applied in  
945 subsequent assays (Supplementary Fig. 17).

946 **Reaction buffer.** Given the effect of the reaction buffer on Nt.BspQI and Klenow  
947 fragment (3'→5' exo-) activity based on product specification from NEB and previous results<sup>2-</sup>  
948 <sup>4</sup>, we proceeded to customize our reaction buffer (Supplementary Fig. 18). The result displayed

949 that the higher iDR product was obtained when the reaction buffer includes 0.5x NEBuffer2  
950 (25 mM NaCl, 5 mM Tris-HCl, 5 mM MgCl<sub>2</sub>, 50 µg/ml BSA) and 0.5x 3.1 Buffer (50 mM  
951 NaCl, 25 mM Tris-HCl, 5 mM MgCl<sub>2</sub>, 50 µg/ml BSA). Because the activity of Nt.BbvCI in  
952 NEBuffer 2.1 which is the optimal reaction buffer for Klenow fragment (3'→5' exo-) is 100%.  
953 Thus, NEBuffer 2.1 was used as the iDR reaction buffer when Nt.BbvCI and Klenow Fragment  
954 (3'→5' exo-) were applied to iDR amplification.

955 **Additives.** We also explored the effects of additives including DMSO and SSB protein  
956 (T4 Gene 32 Protein) on iDR as previous reported<sup>5</sup>. Each reaction was carried out in 10 µL  
957 total volume. All reaction components but the additive were assembled in 9.4 µL. Then 0.6 µL  
958 of 100% DMSO (6%) and 67 µM T4 gene 32 protein (4 µM) was added into a corresponding  
959 tube respectively. The result show that the iDR product was largely increased and the by-  
960 product was decreased and even disappeared with addition of T4 gene 32 protein  
961 (Supplementary Fig. 19). The ssDNA product of iDR appeared “ladder” band. This was  
962 probably because T4 gene 32 protein bound to single-strand DNA.

963 **Effects of DNA fragment (as DNA template) length on iDR.** We studied the effect of  
964 DNA fragment (as template for iDR) length on iDR (Supplementary Fig. 20). The iDR reaction  
965 using Nt.BspQI and Bsu DNA polymerase was not related to the length of DNA fragment.  
966 However, the iDR reaction using Nt.BstNBI and Bst DNA polymerase, large fragment had a  
967 preference for the DNA with less than 200bp.

968 **Adaptor I length.** We investigated the effect of adaptor I length (“primer”, sequence  
969 region at the front of the recognition site of nickase) on iDR (Supplementary Fig. 21). The

970 adaptor I length of booster was 13nt which was enough stable for avoiding the adaptor I  
971 dissociating.

972 **Effects of variation in recognition region on the nicking efficiency of nickase.** We  
973 explored fidelity of Nt.BspQI and Nt.BbvCI by nick the DNA templates containing a base error  
974 at the recognition region (Supplementary Figs. 22-23). The iDR product was observed when  
975 GCTCTTC, recognition sequence of Nt.BspQI, was converted into GCTCTTA. It  
976 demonstrated that Nt.BspQI was not specifically to recognize GCTCTTC (Supplementary Fig.  
977 22). Meanwhile, the iDR product was observed when CCTCAGC, recognition sequence of  
978 Nt.BspQI, was converted into CCTAAGC. It demonstrated that Nt.BspQI was not specifically  
979 to recognize CCTCAGC (Supplementary Fig. 23). Thus, GCTCTTN and CCTNAGC was  
980 evaded in the sequence we encoded.

981 **Effects of DNA templates attached to the streptavidin magnetic beads on iDR.** DNA  
982 templates modified with biotin and attached to the streptavidin magnetic beads had no influence  
983 on iDR reaction (Supplementary Fig. 24).

984 Note: DNA sequences used in the process of systematic optimization are in  
985 Supplementary table 3.

986

987 **Supplementary Note 5. OPN probe design.**

988 OPN probe comprises two parts, from 5' to 3': a universal sequence (Adaptor 2/2-1/2-  
989 2/2-3/2-4) and a barcode sequence.

990 Each barcode sequence was comprised of a number of commutative strong (C or G) and  
991 weak (T or A) nucleotides according to earlier report<sup>1</sup>. Here, the length of barcode was 8  
992 nucleotides, corresponding to a total of  $2^8 = 256$  barcode instances.

993 Universal sequences (namely primer) can be designed based on previous report<sup>6</sup>. Here, a  
994 universal sequence was used and there are 256 probes in OPN 1.0 (Supplementary Table 4).  
995 And four universal sequences were used and there are 1024 ( $4*256$ ) probes in OPN 2.0  
996 (Supplementary Table 5). According to a number of heuristic design criteria, we can obtain an  
997 estimated maximum library size of 14,000 20-mer primer pairs. Thus, an oligo pool containing  
998 up to 3 million oligos can be manipulated by using a combination of universal sequences and  
999 the barcodes ( $14,000*256 = 3,584,000$ ).

1000

1001 **Supplementary Note 6. Calculating logical density and redundancy for DNA storage**  
1002 **systems.**

1003 Logical density calculated for previous studies is taken from Organick et al.<sup>6</sup> Logical  
1004 redundancy for previous studies is taken from Anavy, L. et al.<sup>7</sup> Redundancy for Organick et  
1005 al.<sup>6</sup> is taken from their report.

1006 In this work, due to adjustable system parameter K and L, we take standard system  
1007 parameter (K=252, L=256) as example. Here, we have used 10,752 DNA sequences (a part of  
1008 DNA sequences in Pool 2) of length 200 with payload of length 152 to store 329KB yielding a  
1009 net density of approximately 1.65 bits per base (1.25 bits per base including primers).  
1010 According to our encoding strategy which allows a maximum of 4 DNA sequences to be lost  
1011 or corrupted in each group (each group contains 256 DNA sequences), the redundancy can be  
1012 calculated ideally as:  $4/256=1.56\%$ .

1013

1014 **Supplementary Note 7. Energy consumption.**

1015 We assumed that the system was thermally insulated and there was no energy consumption  
1016 during the state of constant temperature. Energy consumption  $Q = c * v * (T_2 - T_1)$  (c is the  
1017 specific heat capacity of the solution; the volume of the system is v;  $T_1, T_2$  is the initial and the  
1018 final temperature respectively) when the reaction is exothermic. Energy consumption  $Q = c * v * (T_1 - T_2)$  while the reaction is endothermic.

1020 We took 25  $\mu$ L of water as an example. We supposed that the specific heat capacity is  
1021 equivalent to water's (c,  $c = 4.2 * 10^3$  J/(kg \*  $^{\circ}$ C)) and the initial temperature ( $T_0$ ) is 25 $^{\circ}$ C. The  
1022 thermocycling conditions of PCR were as follows: 5 min at 98 $^{\circ}$ C; 10 cycles of: 30s at 98 $^{\circ}$ C,  
1023 30s at 58 $^{\circ}$ C, 10s at 72 $^{\circ}$ C, followed by a 5 min.

1024 25-98  $Q = 4.2 * 10^3 * 25 * 10^{-6} * (98 - 25) = 7.665$  J

1025 98-58  $Q = 4.2 * 10^3 * 25 * 10^{-6} * (98 - 58) = 4.2$  J

1026 58-72  $Q = 4.2 * 10^3 * 25 * 10^{-6} * (72 - 58) = 1.47$  J

1027 72-98  $Q = 4.2 * 10^3 * 25 * 10^{-6} * (98 - 72) = 2.73$  J

1028 10 cycles  $Q_{\text{total}} = 7.665 + (4.2 + 1.47) * 10 + 2.73 * 9 = 88.9$  J

1029 The thermocycling conditions of iDR was as follows: 30 min at 37 $^{\circ}$ C.

1030 25-37  $Q = 4.2 * 10^3 * 25 * 10^{-6} * (37 - 25) = 1.26$  J

1031 To highlight the difference, we've doubled the energy consumption.

1032

1033



1034 **Supplementary Note 8. DNA decay caused by thermal condition.**

1035 Half-life of DNA extrapolate according to the Arrhenius Equation with activation energies  
1036 of  $155 \pm 10 \text{ KJ mol}^{-1}$  and compared to literature data on DNA stability in solution previously  
1037 reported<sup>8</sup> (Supplementary Fig. 29).

1038

1039 **Supplementary Note 9. The bioinformatic statistical analysis.**

1040 We stitched the reads pairs using PEAR<sup>9</sup> used for oligo copy distribution, error and  
1041 dropout ratio analysis.

1042 The sequenced reads were aligned with the given sequences (synthesized by Twist  
1043 Bioscience and CustomArray) by BLAST. Here, the reads without error containing substitution  
1044 and indel were defined as M0G0 reads, and the reads with an error including substitution or  
1045 indel and with two errors including substitution and indel were defined as M1G1 reads whose  
1046 coverage, number and DNA sequences can be obtained via M0G0\_M1G1.pl (Supplementary  
1047 Fig. 30). The M0G0 and M1G1 reads were considered as valid reads.

1048 The coverage and number could be achieved by Valid\_Coverage\_Number.pl  
1049 (Supplementary Fig. 29). The frequency was achieved via the number dividing by total number  
1050 of given sequences. Then the distribution of number of reads per each given sequence was  
1051 displayed (Supplementary Figs.36-37, 41-42, 46,57-60).

1052 The distribution of the number of reads was displayed through analyzing coverage and  
1053 number obtained by Obtain\_Payload.pl (for obtaining valid DNA sequence namely payload),  
1054 Cluster.pl and Sort.pl (Supplementary Figs. 30, 43-44). The frequency was obtained through  
1055 the number dividing by the sum of these numbers.

1056 The coverage of aligned sequences was sorted from small to large and numbered them in  
1057 sequence. Top 30% of the serial number was selected and the frequency of these reads was  
1058 calculated (Supplementary Fig. 38).

1059 115 sequences (1% \* number of oligos in file) with top, bottom, and middle (mode value)

1060 coverage of #1 PCR and #1 iDR acted as a reference database. Per million valid sequences of  
1061 both #5, #10 PCR and #5, #10 iDR were aligned with the chosen sequences. Then the  
1062 percentage of reads was calculated via dividing by 1 million valid reads (Supplementary Fig.  
1063 56).

1064 To depict the normality of oligo distribution, we used the piecewise function.

$$1065 \quad M = F(a + \Delta) - F(a - \Delta)$$

1066 or

$$1067 \quad F(a) = \int_{a-\Delta}^{a+\Delta} f(x) dx$$

1068 Here,  $F(x)$  is distribution function,  $f(x)$  is probability density function,  $a$  is the mean of  
1069 oligo distribution,  $M$  is offset by defining  $\Delta$  as the distance ( $\Delta$  can be different values under  
1070 the condition of  $\Delta \leq a$ ). The area under the histogram is 1. In our study,  $\Delta$  is 50.

1071

1072

1073 **Supplementary Note 10. The process of single-stranded oligo pool amplification (SOA)**  
1074 **and OPN.**

1075 **SOA process.** The schematic of SOA process is illustrated (Supplementary Fig. 62). We used  
1076 PCR to amplify an oligonucleotide library with specific barcodes sequences. Mix 20 ng of  
1077 ssDNA pool (10  $\mu$ L, only 256 of 11776 strands) with 2  $\mu$ L of 100  $\mu$ M of the adaptor 1 and 2  
1078  $\mu$ L of 100  $\mu$ M of the adaptor 2-2, 10  $\mu$ L 5x Q5 reaction buffer, 0.2mM dNTPs, and 21.5  $\mu$ L of  
1079 DNase/RNase-free water. Thermocycling protocol were as follows: (1) 98°C for 3 min, (2) 98°C  
1080 for 30 s, (3) 58°C for 30 s, (4) 72°C for 8 s, (5) go to step 2 30 times, (6) 72°C for 5 min. The  
1081 reaction was then purified according to the instructions in Eastep Gel and PCR Cleanup Kit.  
1082 Then, PCR products were degraded from 5' phosphate groups to 3' direction by lambda  
1083 exonuclease, thus conversion of linear double-stranded DNA to single-stranded DNA (ssDNA).  
1084 The reaction was performed in 30  $\mu$ L reaction mixtures including 3  $\mu$ L 10x Lambda  
1085 Exonuclease Reaction Buffer, 600 ng dsDNA, and 7.5U lambda exonuclease. The reaction was  
1086 incubated at 37°C for 90 min, then stopping it by adding EDTA to 10 mM. The mixture was  
1087 purified by Eastep Gel and PCR Cleanup Kit. Eventually, 10% denaturing (7 mol/L urea) PAGE  
1088 was used to analyze the degraded products. The gel was stained with SYBR Gold for 20 min.  
1089 Further, gel band quantitation was used to assess the yield of ssDNA. Azurespot software was  
1090 subsequently used to perform band detection, background subtraction and band quantitation.  
1091 The concentration of ssDNA was defined as  $C = (\text{the gray value of ssDNA}) * (\text{the quality of}$   
1092  $\text{the standard sample}) / ((\text{the gray value of the standard sample}) * (\text{the volume of ssDNA}))$ .  
1093 Further, we could calculate the mean of ssDNA molecules ( $n_1$ ) according to the quality ( $m$ ) and  
1094 the number of the ssDNA pool ( $N$ ) (namely  $n_1 = m * N_A / (M * N)$ ,  $N_A$  - Avogadro's number;

1095 M – the relative molecular mass of ssDNA).

1096 **OPN process.** The schematic of OPN process is illustrated (Supplementary Fig. 61). The oligo  
1097 pool normalizing probes (OPN probes) were synthesized respectively (Supplementary Table 4  
1098 and Supplementary Table 5). Take 256 as an example, an equimolar mixture of OPN probes  
1099 (256), which the number of each OPN probe was less than the mean of ssDNA molecules ( $n_1$ ),  
1100 was applied to capture the corresponding oligo separately. The sample without the process of  
1101 OPN was mixed with adaptor 2-1. The number of adaptor 2-1 was equal to the mean of ssDNA  
1102 molecules ( $n_1$ ) \* 256. In the reaction, 20  $\mu$ L of the ssDNA (1.0769 pmol of ssDNA pool) was  
1103 mixed with 5.3  $\mu$ L of OPN probes (4.134 attomol of each probe) and 24.7  $\mu$ L of hybridization  
1104 buffer (10 mM Tris-EDTA, 0.5 M NaCl, and 0.05% Tween-20 (volume / volume). The mixture  
1105 was denatured at 95°C for 3 min and slowly cooled to 60°C at a ramp of 0.1°C/s, following  
1106 kept for 2 h at 60°C using an Eppendorf Mastercycler instrument. Extension reaction was  
1107 carried out in 65  $\mu$ L reaction mixture. Before use, the pre-reaction mixture was mixed  
1108 containing 6.5  $\mu$ L of 10x EasyTaq Reaction Buffer, 5.2  $\mu$ L of 2.5 mM of dNTPs, 2.5 U EasyTaq,  
1109 and 2.3  $\mu$ L DNase/RNase-water. To ensure temperature uniformity, the pre-reaction mixture  
1110 was also pre-heated to 60°C before addition to the ssDNA/OPN probe mixture. The resulting  
1111 mixture was incubated for another 15 min at 60°C to extend completely. Then, 5 U Exo I was  
1112 added to the resulting mixture. And the resulting mixture was incubated at 37°C for 3 h, then  
1113 80°C for 20 min to inactivate Exo I. The resulting mixture after being digested by Exo I was  
1114 incubated for another 30 min at 37°C at shaker to allow the biotin-streptavidin capture reaction  
1115 to proceed. Magnet was applied to side of tube for approximately 30 seconds, then the  
1116 supernatant was removed and discarded. Finally, the precipitate was washed by Wash/Binding

1117 Buffer twice and resuspended as the template for iDR using 20  $\mu$ L 0.5x TE Buffer.

1118

1119

1120 **Supplementary Note 11. Calculating error rate.**

1121 All sequenced reads were aligned with the actual reference sequences by basic sequence  
1122 alignment program BLAST to screen out these reads with errors containing substitution,  
1123 insertion, and deletion (henceforth referred to simply as “errors”) at the payload of individual  
1124 sequences. And the number of reads with an error, two errors, three errors, ....., ten errors,  
1125 more than ten errors in individual sequences were counted in detail by Mismatch\_Analysis.pl  
1126 and Gap\_Analysis.pl and the frequency were calculated through the number of these reads  
1127 dividing by the total number of noisy reads (Supplementary Figs. 31-35).

1128

1129 **Supplementary Note 12. Minimum sequencing resource for perfect decoding.**

1130 Taking pool 1 as an example. 12K oligo pool is composed of 11520 oligos. We  
1131 theoretically recovered the file at a coverage of 426 x in #10 PCR. We successfully retrieved  
1132 the file at a coverage of 12 x in #10 iDR and 8 x in OPN-iDR. The percentage of valid reads  
1133 are 48.58%, 92.21%, and 94.1% among corresponding noisy reads of #10 PCR, #10 iDR, and  
1134 OPN-iDR respectively. Therefore, the total noisy reads which recovered the information with  
1135 100% accuracy required  $11520 \times 426 / 48.58\% = 10,101,935$ ,  $11520 \times 12 / 92.21\% = 149,919$ ; and  
1136  $11520 \times 8 / 94.1\% = 97,938$  of PCR, iDR, and OPN-iDR separately. The ratio of noisy reads  
1137 needed for successful decoding of #10 PCR to #10 iDR was 67-folds, and the ratio of #10 PCR  
1138 to OPN-iDR was 103-folds.

1139



1140 **References**

- 1141 1. Pinto, A., Chen, S.X. & Zhang, D.Y. Simultaneous and stoichiometric purification of  
1142 hundreds of oligonucleotides. *Nat Commun* **9**, 2467 (2018).
- 1143 2. Walker, G.T. Empirical aspects of strand displacement amplification. *PCR Methods*  
1144 *Appl* **3**, 1-6 (1993).
- 1145 3. Zhou, X. & Xing, D. Amplified electrochemiluminescence detection of nucleic acids  
1146 by hairpin probe-based isothermal amplification. *Analyst* **137**, 4188-4192 (2012).
- 1147 4. Ehses, S., Ackermann, J. & McCaskill, J.S. Optimization and design of oligonucleotide  
1148 setup for strand displacement amplification. *J Biochem Biophys Methods* **63**, 170-186  
1149 (2005).
- 1150 5. Mok, E., Wee, E., Wang, Y. & Trau, M. Comprehensive evaluation of molecular  
1151 enhancers of the isothermal exponential amplification reaction. *Sci Rep* **6**, 37837 (2016).
- 1152 6. Organick, L. et al. Random access in large-scale DNA data storage. *Nat Biotechnol* **36**,  
1153 242-248 (2018).
- 1154 7. Anavy, L., Vaknin, I., Atar, O., Amit, R. & Yakhini, Z. Data storage in DNA with fewer  
1155 synthesis cycles using composite DNA letters. *Nat Biotechnol* (2019).
- 1156 8. Grass, R.N., Heckel, R., Puddu, M., Paunescu, D. & Stark, W.J. Robust chemical  
1157 preservation of digital information on DNA in silica with error-correcting codes.  
1158 *Angewandte Chemie* **54**, 2552-2555 (2015).
- 1159 9. Zhang, J., Kobert, K., Flouri, T. & Stamatakis, A. PEAR: a fast and accurate Illumina  
1160 Paired-End reAd mergeR. *Bioinformatics* **30**, 614-620 (2014).

1161

1162
